# Supplementary material for: Deficiency of nucleotide excision repair is associated with mutational signature observed in cancer
Source: HighWire-hosted journal article supplement (doi:10.1101/gr.246223.118), 2019-06-20
Supplement: Supplemental_Data_S1.xlsx [file Supplemental_Data_S1.xlsx]

## Sheet: repair_genes
Supplemental Data S1. Expression of DNA repair genes in liver and small intestine of WT and Ercc1-/Δ mice.
		Liver					Small intestine
Ensembl gene ID	Gene symbol	Mean expression (WT)	Mean expression (Ercc1-/Δ)	log2FoldChange	P-value	Adjusted P-value	Mean expression (WT)	Mean expression (Ercc1-/Δ)	log2FoldChange	P-value	Adjusted P-value
ENSMUSG00000035960	Apex1	2249.48	2773.49	0.302114	0.888339	1	1538.37	1261.74	-0.285985	0.383061	0.979726
ENSMUSG00000025269	Apex2	182.942	136.488	-0.422616	0.381538	1	128.425	134.689	0.0687053	0.773553	0.979726
ENSMUSG00000030528	Blm	291.438	240.176	-0.279094	0.481652	1	421.51	377.849	-0.157759	0.510768	0.979726
ENSMUSG00000017146	Brca1	355.484	305.993	-0.216283	0.737683	1	498.38	518.112	0.0560178	0.853659	0.979726
ENSMUSG00000041147	Brca2	196.39	224.122	0.190563	0.572056	1	312.316	311.352	-0.00446044	0.966462	1
ENSMUSG00000024740	Ddb1	10130.5	9140.72	-0.148328	0.777717	1	8705.07	9107.84	0.0652528	0.731345	0.979726
ENSMUSG00000002109	Ddb2	187.092	274.513	0.553127	0.227158	1	245.113	265.28	0.114069	0.81538	0.979726
ENSMUSG00000030400	Ercc2	885.379	466.555	-0.924248	0.0198339	1	572.147	369.417	-0.631134	0.0430555	0.979726
ENSMUSG00000024382	Ercc3	1020.28	894.386	-0.189992	0.615449	1	841.985	855.523	0.0230115	0.843012	0.979726
ENSMUSG00000022545	Ercc4	353.895	285.837	-0.308131	0.612824	1	288.418	301.885	0.0658388	0.713821	0.979726
ENSMUSG00000026048	Ercc5	842.775	699.26	-0.269318	0.647913	1	450.483	522.562	0.21413	0.499418	0.979726
ENSMUSG00000054051	Ercc6	595.982	568.048	-0.0692547	0.993836	1	408.673	399.639	-0.0322509	0.964648	1
ENSMUSG00000021694	Ercc8	130.418	117.215	-0.153976	0.681014	1	146.417	135.559	-0.111161	0.79735	0.979726
ENSMUSG00000039748	Exo1	315.324	268.634	-0.231193	0.534691	1	355.722	322.607	-0.140972	0.642791	0.979726
ENSMUSG00000032815	Fanca	373.285	252.194	-0.565745	0.237923	1	305.418	240.27	-0.346131	0.462906	0.979726
ENSMUSG00000021461	Fancc	236.008	193.343	-0.287673	0.454094	1	155.191	140.887	-0.1395	0.714783	0.979726
ENSMUSG00000007570	Fance	393.823	340.93	-0.208071	0.635575	1	327.989	233.93	-0.487574	0.154285	0.979726
ENSMUSG00000092118	Fancf	89.3772	92.97	0.0568584	1	1	100.359	79.203	-0.341539	0.358585	0.979726
ENSMUSG00000028453	Fancg	145.632	124.644	-0.224511	0.724077	1	200.637	171.913	-0.222911	0.580875	0.979726
ENSMUSG00000024742	Fen1	659.229	595.11	-0.147624	0.519516	1	757.429	555.25	-0.447975	0.438591	0.979726
ENSMUSG00000026934	Lhx3	0	0	NA	NA	NA	0.210891	0	NA	NA	NA
ENSMUSG00000056394	Lig1	1269.65	1052.62	-0.270447	0.379992	1	1995.56	1520.71	-0.392045	0.168931	0.979726
ENSMUSG00000020697	Lig3	758.834	702.952	-0.11036	0.856433	1	822.128	866.808	0.076349	0.765289	0.979726
ENSMUSG00000049717	Lig4	242.595	243.833	0.00734719	0.960902	1	215.069	211.875	-0.0215872	0.949101	1
ENSMUSG00000030322	Mbd4	107.556	109.295	0.0231355	0.869133	1	132.455	137.993	0.0590971	0.845848	0.979726
ENSMUSG00000054612	Mgmt	654.258	706.765	0.11137	0.974454	1	141.785	174.72	0.301338	0.433143	0.979726
ENSMUSG00000032498	Mlh1	404.747	367.165	-0.140591	0.768521	1	401.284	428.148	0.0934871	0.740445	0.979726
ENSMUSG00000021245	Mlh3	291.971	312.942	0.100073	0.690823	1	245.935	313.661	0.350928	0.246673	0.979726
ENSMUSG00000020287	Mpg	396.074	403.859	0.0280835	0.951549	1	363.85	274.823	-0.404839	0.195575	0.979726
ENSMUSG00000031928	Mre11a	548.416	567.263	0.0487466	0.992812	1	604.115	646.576	0.0979967	0.777769	0.979726
ENSMUSG00000024151	Msh2	1278.08	1398.14	0.129535	0.849288	1	1601.5	1657.04	0.0491868	0.90377	0.988122
ENSMUSG00000014850	Msh3	424.287	454.989	0.10079	0.822284	1	305.896	294.811	-0.0532511	0.837958	0.979726
ENSMUSG00000007035	Msh5	62.9857	72.5636	0.204222	0.538446	1	84.4388	91.0613	0.108932	0.616011	0.979726
ENSMUSG00000005370	Msh6	1459.81	1664.73	0.18951	0.744349	1	1593.47	1436.82	-0.149293	0.502197	0.979726
ENSMUSG00000028687	Mutyh	81.5433	51.6974	-0.657474	0.28388	1	82.8107	58.249	-0.507582	0.211373	0.979726
ENSMUSG00000028224	Nbn	293.184	316.694	0.111283	0.770915	1	396.033	477.989	0.271355	0.409478	0.979726
ENSMUSG00000032298	Neil1	161.926	149.918	-0.111161	0.828039	1	210.182	172.398	-0.285898	0.435903	0.979726
ENSMUSG00000041429	Nthl1	87.9669	136.381	0.632607	0.322596	1	96.3924	97.2605	0.0129353	0.994298	1
ENSMUSG00000030271	Ogg1	227.533	235.633	0.0504655	0.929966	1	216.416	195.193	-0.148903	0.701763	0.979726
ENSMUSG00000026496	Parp1	1578.12	1284.07	-0.297485	0.575873	1	1486.77	1308.1	-0.184705	0.533325	0.979726
ENSMUSG00000027342	Pcna	2467.27	3068.76	0.314737	0.60878	1	3717.65	3320.86	-0.162836	0.45939	0.979726
ENSMUSG00000026098	Pms1	71.0585	97.0318	0.44945	0.41688	1	153.771	175.089	0.187308	0.636407	0.979726
ENSMUSG00000075569	Pms2	2.66128	6.79182	1.35168	0.558301	1	2.41334	3.58667	0.571614	0.732865	0.979726
ENSMUSG00000079109	Pms2	196.22	169.282	-0.213043	0.727016	1	198.891	211.007	0.0853192	0.798324	0.979726
ENSMUSG00000031536	Polb	533.292	568.363	0.0918882	0.954315	1	451.531	548.195	0.279864	0.364961	0.979726
ENSMUSG00000038644	Pold1	810.187	615.583	-0.396301	0.350501	1	1198.92	880.251	-0.44575	0.139534	0.979726
ENSMUSG00000020471	Pold2	873.209	774.781	-0.172538	0.594562	1	1160.28	779.937	-0.573044	0.0463101	0.979726
ENSMUSG00000030726	Pold3	821.622	902.735	0.135827	0.810476	1	891.071	834.386	-0.0948254	0.731719	0.979726
ENSMUSG00000024854	Pold4	595.039	781.608	0.393461	0.354668	1	2215.49	2023.8	-0.130557	0.850951	0.979726
ENSMUSG00000097508	Pold4	0	0	NA	NA	NA	0	0	NA	NA	NA
ENSMUSG00000007080	Pole	574.993	415.847	-0.467493	0.336012	1	746.84	663.551	-0.170591	0.604427	0.979726
ENSMUSG00000020974	Pole2	360.661	383.623	0.0890435	0.91902	1	280.955	237.282	-0.243737	0.38276	0.979726
ENSMUSG00000028394	Pole3	768.698	796.455	0.0511764	0.839502	1	633.196	521.751	-0.279291	0.325985	0.979726
ENSMUSG00000022248	Rad1	207.595	245.555	0.242278	0.728079	1	224.023	214.746	-0.061017	0.809036	0.979726
ENSMUSG00000021635	Rad17	371.302	375.769	0.0172529	0.960057	1	323.132	421.438	0.383196	0.236312	0.979726
ENSMUSG00000020380	Rad50	953.12	1028.02	0.10914	0.635358	1	1130.04	1256.69	0.153247	0.599641	0.979726
ENSMUSG00000027323	Rad51	404.821	424.879	0.0697686	0.962037	1	498.913	422.475	-0.239922	0.385127	0.979726
ENSMUSG00000007646	Rad51c	70.6094	64.5905	-0.12854	0.830995	1	127.202	94.9707	-0.42157	0.218978	0.979726
ENSMUSG00000030166	Rad52	176.023	178.165	0.0174503	0.803272	1	212.008	223.57	0.0766097	0.860967	0.979726
ENSMUSG00000030243	Recql	254.506	392.705	0.625747	0.284325	1	229.968	452.05	0.97505	0.0277187	0.979726
ENSMUSG00000033762	Recql4	108.483	73.1068	-0.569393	0.275886	1	149.24	94.0399	-0.666289	0.265186	0.979726
ENSMUSG00000020752	Recql5	383.232	323.017	-0.24661	0.612871	1	347.302	322.02	-0.109038	0.828373	0.979726
ENSMUSG00000029191	Rfc1	1124.11	1092.45	-0.0412103	1	1	1397.82	1453.34	0.056193	0.820812	0.979726
ENSMUSG00000023104	Rfc2	1109.35	1084.62	-0.0325288	0.723255	1	963.414	804.31	-0.260404	0.370068	0.979726
ENSMUSG00000033970	Rfc3	476.223	498.393	0.0656462	0.904617	1	498.983	369.255	-0.434372	0.279652	0.979726
ENSMUSG00000022881	Rfc4	192.936	312.246	0.694561	0.478797	1	324.476	371.164	0.193944	0.670654	0.979726
ENSMUSG00000029363	Rfc5	571.946	672.276	0.233175	0.697971	1	623.97	615.678	-0.0193	0.872195	0.979726
ENSMUSG00000000751	Rpa1	1272.29	1049.55	-0.277647	0.439042	1	1226.03	1001.14	-0.292346	0.317771	0.979726
ENSMUSG00000028884	Rpa2	571.223	586.12	0.0371438	0.809773	1	663.27	471.021	-0.493807	0.195792	0.979726
ENSMUSG00000012483	Rpa3	504.691	679.034	0.428084	0.676433	1	711.622	746.225	0.0685012	0.987227	1
ENSMUSG00000036061	Smug1	358.385	295.561	-0.278053	0.676631	1	344.848	330.112	-0.0630067	0.933245	1
ENSMUSG00000034674	Tdg	694.773	537.903	-0.369195	0.413064	1	646.537	585.753	-0.14244	0.593615	0.979726
ENSMUSG00000029591	Ung	328.976	280.246	-0.231286	0.397506	1	379.868	274.091	-0.470844	0.125581	0.979726
ENSMUSG00000031583	Wrn	198.446	249.035	0.3276	0.444648	1	435.411	530.722	0.28558	0.309978	0.979726
ENSMUSG00000028329	Xpa	241.339	425.278	0.817348	0.310318	1	221.024	304.552	0.462486	0.149651	0.979726
ENSMUSG00000030094	Xpc	591.86	648.138	0.131045	0.656736	1	389.274	399.616	0.0378268	0.83079	0.979726
ENSMUSG00000051768	Xrcc1	706.421	457.106	-0.627998	0.107035	1	499.321	397.542	-0.32886	0.352954	0.979726
ENSMUSG00000028933	Xrcc2	103.704	69.5879	-0.575558	0.351396	1	85.9481	74.7741	-0.200927	0.587243	0.979726
ENSMUSG00000021287	Xrcc3	87.3135	76.4595	-0.191508	0.733659	1	91.1085	74.8674	-0.283247	0.492769	0.979726
ENSMUSG00000021615	Xrcc4	192.588	293.945	0.610025	0.22864	1	141.345	210.074	0.571674	0.100576	0.979726
ENSMUSG00000026187	Xrcc5	994.588	1106.09	0.153302	0.911603	1	613.949	725.658	0.241172	0.365974	0.979726
ENSMUSG00000022471	Xrcc6	689.967	635.689	-0.118208	0.811765	1	802.562	754.023	-0.0900053	0.677996	0.979726
ENSMUSG00000001065	Zfp276	325.56	355.466	0.126791	0.648829	1	311.834	312.14	0.00141771	0.888883	0.984979
