# Supplementary material for: Deficiency of nucleotide excision repair is associated with mutational signature observed in cancer
Source: HighWire-hosted journal article supplement (doi:10.1101/gr.246223.118), 2019-06-20
Supplement: Supplemental_Data_S2.xlsx [file Supplemental_Data_S2.xlsx]

## Sheet: ercc1_positions
Supplemental Data S2. Validation of base subsitutions in both WT and Ercc1-/Δ mice.
CHR	POS	REF	ALT_DESIGN	ALT_VCF	FILTER	Ercc1-/Δ1Liver	Ercc1-/Δ1SI	Ercc1-/Δ2Liver	Ercc1-/Δ2SI	Ercc1-/Δ3Liver	Ercc1-/Δ3SI	WT2SI	WT3Liver	WT3SI	WT1Tail	WT1Liver	WT2Liver	COUNT_REF	MATCH_ORIGINAL	AUTO_VALIDATED	MANUAL_VALIDATED	VALIDATED
1	3005877	A	G	G	PASS	0/0	0/0	0/0	0/0	0/0	0/0	0/0	0/0	0/1	0/0	0/0	0/0	11	1	TRUE		TRUE
1	3157307	T	A	A	PASS	0/0	0/0	1/1	0/0	0/0	0/0	0/0	0/0	0/0	0/0	0/0	0/0	11	1	2		TRUE
1	3250246	A	T	T	PASS	0/0	0/1	0/0	0/0	0/0	0/0	0/0	0/0	0/0	0/0	0/0	0/0	11	1	3		TRUE
1	3326991	C	T	T	PASS	0/0	0/0	0/0	0/0	0/0	0/1	0/0	0/0	0/0	0/0	0/0	0/0	11	1	4		TRUE
1	3376744	G	A	A	PASS	0/0	0/0	0/0	0/0	0/0	0/0	0/0	0/0	0/0	0/0	0/0	0/1	11	1	5		TRUE
1	4645475	C	A	A	PASS	0/0	0/0	0/0	0/0	0/0	0/0	0/0	0/1	0/0	0/0	0/0	0/0	11	1	6		TRUE
1	4979835	C	A	A	PASS	0/0	0/0	0/0	0/0	0/0	0/0	0/1	0/0	0/0	0/0	0/0	0/0	11	1	7		TRUE
1	5326664	C	T	T	PASS	0/0	0/0	0/0	0/0	0/1	0/0	0/0	0/0	0/0	0/0	0/0	0/0	11	1	8		TRUE
1	6822961	G	T	T	PASS	0/1	0/0	0/0	0/0	0/0	0/0	0/0	0/0	0/0	0/0	0/0	0/0	11	1	9		TRUE
1	7043991	T	A	A	PASS	0/0	0/0	0/1	0/0	0/0	0/0	0/0	0/0	0/0	0/0	0/0	0/0	11	1	10		TRUE
1	7639437	C	A	A	PASS	0/1	0/0	0/0	0/0	0/0	0/0	0/0	0/0	0/0	0/0	0/0	0/0	11	1	11		TRUE
1	8449941	C	A	A	PASS	0/0	0/0	0/0	0/0	0/1	0/0	0/0	0/0	0/0	0/0	0/0	0/0	11	1	12		TRUE
1	10727392	G	T	T	PASS	0/0	0/0	0/1	0/0	0/0	0/0	0/0	0/0	0/0	0/0	0/0	0/0	11	1	13		TRUE
1	11472702	G	T	T	PASS	0/0	0/0	0/0	0/0	0/0	0/1	0/0	0/0	0/0	0/0	0/0	0/0	11	1	14		TRUE
1	11614071	T	A	A	PASS	0/0	0/0	0/0	0/0	0/0	0/0	0/0	0/0	0/0	0/0	0/1	0/0	11	1	15		TRUE
1	11662231	T	A	A	PASS	0/0	0/0	0/0	0/0	0/0	0/0	0/1	0/0	0/0	0/0	0/0	0/0	11	1	16		TRUE
1	11697032	A	T	T	PASS	0/0	0/0	0/0	0/0	0/1	0/0	0/0	0/0	0/0	0/0	0/0	0/0	11	1	17		TRUE
1	11763778	A	C	C	PASS	0/0	0/1	0/0	0/0	0/0	0/0	0/0	0/0	0/0	0/0	0/0	0/0	11	1	18		TRUE
1	12307908	C	A	A	PASS	0/0	0/0	0/0	0/0	0/0	0/0	0/0	0/0	0/1	0/0	0/0	0/0	11	1	19		TRUE
1	12758582	C	T	T	PASS	0/0	0/0	0/0	0/0	0/1	0/0	0/0	0/0	0/0	0/0	0/0	0/0	11	1	20		TRUE
1	13861216	C	T	T	PASS	0/0	0/0	0/0	0/0	0/0	0/0	0/0	0/0	0/1	0/0	0/0	0/0	11	1	21		TRUE
1	13942075	A	G	G	SnpCluster	0/0	0/0	0/0	0/0	0/0	0/0	0/0	0/1	0/0	0/0	0/0	0/0	11	1	FALSE	TRUE	TRUE
1	13942076	G	T	T	SnpCluster	0/0	0/0	0/0	0/0	0/0	0/0	0/0	0/1	0/0	0/0	0/0	0/0	11	1	FALSE	TRUE	TRUE
1	13942089	T	A	A	SnpCluster	0/0	0/0	0/0	0/0	0/0	0/0	0/0	0/0	0/1	0/0	0/0	0/0	11	1	FALSE	TRUE	TRUE
1	14742464	C	T	T	PASS	0/0	0/0	0/0	0/0	0/1	0/0	0/0	0/0	0/0	0/0	0/0	0/0	11	1	22		TRUE
1	15156994	G	T	T	PASS	0/1	0/0	0/0	0/0	0/0	0/0	0/0	0/0	0/0	0/0	0/0	0/0	11	1	23		TRUE
1	15175218	A	G	G	PASS	0/0	0/0	0/0	0/0	0/0	0/1	0/0	0/0	0/0	0/0	0/0	0/0	11	1	24		TRUE
1	16421863	G	A	A	PASS	0/0	0/0	0/0	0/0	0/0	0/0	0/0	0/0	0/1	0/0	0/0	0/0	11	1	25		TRUE
1	17093024	A	G	G	PASS	0/0	0/0	0/0	0/0	0/0	0/0	0/0	0/1	0/0	0/0	0/0	0/0	11	1	26		TRUE
1	17276708	C	T	T	PASS	0/0	0/0	0/0	0/0	0/0	0/0	0/0	0/0	0/1	0/0	0/0	0/0	11	1	27		TRUE
1	18511282	C	A	A	PASS	0/1	0/0	0/0	0/0	0/0	0/0	0/0	0/0	0/0	0/0	0/0	0/0	11	1	28		TRUE
1	18633709	C	T	T	PASS	0/0	0/0	0/0	0/0	0/0	0/0	0/0	0/0	0/1	0/0	0/0	0/0	11	1	29		TRUE
1	18765916	C	A	A	PASS	0/0	0/0	0/0	0/0	0/0	0/0	0/0	0/1	0/0	0/0	0/0	0/0	11	1	30		TRUE
1	19348056	G	A	A	PASS	0/0	0/0	0/0	0/0	0/0	0/0	0/0	0/0	0/1	0/0	0/0	0/0	11	1	31		TRUE
1	19963547	C	A	A	PASS	0/1	0/0	0/0	0/0	0/0	0/0	0/0	0/0	0/0	0/0	0/0	0/0	11	1	32		TRUE
1	19963548	C	T	T	PASS	0/1	0/0	0/0	0/0	0/0	0/0	0/0	0/0	0/0	0/0	0/0	0/0	11	1	33		TRUE
1	20164262	T	G	G	PASS	0/0	0/0	0/0	0/0	0/1	0/0	0/0	0/0	0/0	0/0	0/0	0/0	11	1	34		TRUE
1	20303170	A	G	G	PASS	0/0	0/0	0/0	0/0	0/0	0/0	0/0	0/0	0/1	0/0	0/0	0/0	11	1	35		TRUE
1	20444537	T	A	A	PASS	0/1	0/0	0/0	0/0	0/0	0/0	0/0	0/0	0/0	0/0	0/0	0/0	11	1	36		TRUE
1	21300470	C	A	A	PASS	0/1	0/0	0/0	0/0	0/0	0/0	0/0	0/0	0/0	0/0	0/0	0/0	11	1	37		TRUE
1	21463064	C	T	T	PASS	0/1	0/0	0/0	0/0	0/0	0/0	0/0	0/0	0/0	0/0	0/0	0/0	11	1	38		TRUE
1	21734215	G	T	T	PASS	0/0	0/0	0/1	0/0	0/0	0/0	0/0	0/0	0/0	0/0	0/0	0/0	11	1	39		TRUE
1	22010075	C	T	T	PASS	0/0	0/0	0/1	0/0	0/0	0/0	0/0	0/0	0/0	0/0	0/0	0/0	11	1	40		TRUE
1	22073152	T	A	A	PASS	0/1	0/0	0/0	0/0	0/0	0/0	0/0	0/0	0/0	0/0	0/0	0/0	11	1	41		TRUE
1	22765025	C	A	A	PASS	0/0	0/0	0/0	0/0	0/0	0/0	0/0	0/0	0/0	0/0	0/0	0/1	11	1	42		TRUE
1	24352852	G	T	T	PASS	0/0	0/0	0/0	0/0	0/0	0/0	0/0	0/0	0/0	0/0	0/0	0/1	11	1	43		TRUE
1	25156604	C	T	T	PASS	0/1	0/0	0/0	0/0	0/0	0/0	0/0	0/0	0/0	0/0	0/0	0/0	11	1	44		TRUE
1	25307356	C	A	A	PASS	0/0	0/0	0/0	0/0	0/0	0/0	0/0	0/0	0/0	0/0	0/0	0/1	11	1	45		TRUE
1	25483749	C	T	T	PASS	0/0	0/0	0/0	0/0	0/0	0/1	0/0	0/0	0/0	0/0	0/0	0/0	11	1	46		TRUE
1	25537770	A	T	T	PASS	0/0	0/0	0/1	0/0	0/0	0/0	0/0	0/0	0/0	0/0	0/0	0/0	11	1	47		TRUE
1	25762627	G	A	A	PASS	0/1	0/0	0/0	0/0	0/0	0/0	0/0	0/0	0/0	0/0	0/0	0/0	11	1	48		TRUE
1	26123912	T	A	A	PASS	0/0	0/0	0/0	0/0	0/0	0/0	0/0	0/0	0/1	0/0	0/0	0/0	11	1	49		TRUE
1	26241472	T	C	C	PASS	0/1	0/0	0/0	0/0	0/0	0/0	0/0	0/0	0/0	0/0	0/0	0/0	11	1	50		TRUE
1	26562491	C	A	A	PASS	0/0	0/0	0/0	0/0	0/0	0/0	0/0	0/1	0/0	0/0	0/0	0/0	11	1	51		TRUE
1	26608045	A	T	T	PASS	0/0	0/0	0/0	0/0	0/1	0/0	0/0	0/0	0/0	0/0	0/0	0/0	11	1	52		TRUE
1	26942023	C	A	A	PASS	0/0	0/0	0/1	0/0	0/0	0/0	0/0	0/0	0/0	0/0	0/0	0/0	11	1	53		TRUE
1	27401647	G	A	A	PASS	0/0	0/0	0/0	0/0	0/1	0/0	0/0	0/0	0/0	0/0	0/0	0/0	11	1	54		TRUE
1	27499058	G	C	C	PASS	0/0	0/1	0/0	0/0	0/0	0/0	0/0	0/0	0/0	0/0	0/0	0/0	11	1	55		TRUE
1	27559592	G	A	A	PASS	0/0	0/0	0/0	0/0	0/0	0/0	0/0	0/0	0/0	0/0	0/1	0/0	11	1	56		TRUE
1	27597229	A	C	C	PASS	0/0	0/0	0/1	0/0	0/0	0/0	0/0	0/0	0/0	0/0	0/0	0/0	11	1	57		TRUE
1	27895364	C	T	T	PASS	0/0	0/0	0/0	0/1	0/0	0/0	0/0	0/0	0/0	0/0	0/0	0/0	11	1	58		TRUE
1	27921711	A	G	G	PASS	0/0	0/0	0/0	0/1	0/0	0/0	0/0	0/0	0/0	0/0	0/0	0/0	11	1	59		TRUE
1	28148724	G	T	T	PASS	0/0	0/0	0/1	0/0	0/0	0/0	0/0	0/0	0/0	0/0	0/0	0/0	11	1	60		TRUE
1	28148726	G	T	T	PASS	0/0	0/0	0/1	0/0	0/0	0/0	0/0	0/0	0/0	0/0	0/0	0/0	11	1	61		TRUE
1	28237227	A	G	G	PASS	0/0	0/0	0/0	0/0	0/1	0/0	0/0	0/0	0/0	0/0	0/0	0/0	11	1	62		TRUE
1	28331941	A	T	T	PASS	0/0	0/1	0/0	0/0	0/0	0/0	0/0	0/0	0/0	0/0	0/0	0/0	11	1	63		TRUE
1	28596958	C	G	G	PASS	0/0	0/0	0/0	0/1	0/0	0/0	0/0	0/0	0/0	0/0	0/0	0/0	11	1	64		TRUE
1	28866259	G	A	A	PASS	0/0	./.	0/0	0/1	./.	0/0	0/0	./.	0/0	./.	./.	0/0	6	1	FALSE	?	FALSE
1	29045112	G	T	T	PASS	0/1	0/0	0/0	0/0	0/0	0/0	0/0	0/0	0/0	0/0	0/0	0/0	11	1	65		TRUE
1	29090562	T	C	C	PASS	0/0	0/1	0/0	0/0	0/0	0/0	0/0	0/0	0/0	0/0	0/0	0/0	11	1	66		TRUE
1	29167421	C	T	T	PASS	0/0	0/0	0/0	0/0	0/1	0/0	0/0	0/0	0/0	0/0	0/0	0/0	11	1	67		TRUE
1	29212743	C	A	A	PASS	0/0	0/0	0/0	0/1	0/0	0/0	0/0	0/0	0/0	0/0	0/0	0/0	11	1	68		TRUE
1	29213689	C	A	A	PASS	0/0	0/0	0/1	0/0	0/0	0/0	0/0	0/0	0/0	0/0	0/0	0/0	11	1	69		TRUE
1	29353585	A	G	G	PASS	0/0	0/0	0/1	0/0	0/0	0/0	0/0	0/0	0/0	0/0	0/0	0/0	11	1	70		TRUE
1	29899146	C	T	T	PASS	0/0	0/1	0/0	0/0	0/0	0/0	0/0	0/0	0/0	0/0	0/0	0/0	11	1	71		TRUE
1	30114503	T	C	C	PASS	0/1	0/1	0/0	0/1	0/0	0/1	0/1	0/1	0/1	0/1	0/0	0/1	3	1	FALSE	TRUE	TRUE
1	30114504	C	G	G	PASS	0/1	0/1	0/0	0/1	0/0	0/1	0/1	0/1	0/1	0/1	0/0	0/1	3	1	FALSE	TRUE	TRUE
1	30507994	A	G	G	PASS	0/0	0/0	0/0	0/0	0/1	0/0	0/0	0/0	0/0	0/0	0/0	0/0	11	1	72		TRUE
1	30566266	A	C	C	PASS	0/0	0/0	0/1	0/0	0/0	0/0	0/0	0/0	0/0	0/0	0/0	0/0	11	1	73		TRUE
1	30794714	C	A	A	PASS	0/0	0/0	0/0	0/0	0/0	0/0	0/0	0/0	0/1	0/0	0/0	0/0	11	1	74		TRUE
1	32573144	C	T	T	PASS	0/0	0/0	0/0	0/0	0/0	0/0	0/0	0/0	0/1	0/0	0/0	0/0	11	1	75		TRUE
1	32600001	C	T	T	PASS	0/0	0/1	0/0	0/0	0/0	0/0	0/0	0/0	0/0	0/0	0/0	0/0	11	1	76		TRUE
1	32766706	A	G	G	PASS	0/0	0/1	0/0	0/0	0/0	0/0	0/0	0/0	0/0	0/0	0/0	0/0	11	1	77		TRUE
1	33218250	G	A	A	PASS	0/0	0/0	0/0	0/0	0/0	0/0	0/0	0/0	0/0	0/0	0/1	0/0	11	1	78		TRUE
1	33320981	T	G	G	PASS	0/0	0/0	0/0	0/1	0/0	0/0	0/0	0/0	0/0	0/0	0/0	0/0	11	1	79		TRUE
1	33401052	T	C	C	PASS	0/1	0/0	0/0	0/0	0/0	0/0	0/0	0/0	0/0	0/0	0/0	0/0	11	1	80		TRUE
1	33822066	C	T	T	PASS	0/0	0/0	0/0	0/0	0/1	0/0	0/0	0/0	0/0	0/0	0/0	0/0	11	1	81		TRUE
1	34241479	C	A	A	PASS	0/1	0/0	0/0	0/0	0/0	0/0	0/0	0/0	0/0	0/0	0/0	0/0	11	1	82		TRUE
1	37063505	C	T	T	PASS	0/0	0/0	0/1	0/0	0/0	0/0	0/0	0/0	0/0	0/0	0/0	0/0	11	1	83		TRUE
1	37602977	C	T	T	SNP_LowQualityDepth	0/0	0/1	0/0	0/0	0/0	0/0	0/0	0/0	0/0	0/0	0/0	0/0	11	1	FALSE	TRUE	TRUE
1	37621928	G	A	A	PASS	0/0	0/0	0/0	0/0	0/1	0/0	0/0	0/0	0/0	0/0	0/0	0/0	11	1	84		TRUE
1	41518019	G	C	C	PASS	0/0	0/0	0/1	0/0	0/0	0/0	0/0	0/0	0/0	0/0	0/0	0/0	11	1	85		TRUE
1	41955323	C	G	G	PASS	0/1	0/0	0/0	0/0	0/0	0/0	0/0	0/0	0/0	0/0	0/0	0/0	11	1	86		TRUE
1	42398053	T	A	A	PASS	0/0	0/0	0/1	0/0	0/0	0/0	0/0	0/0	0/0	0/0	0/0	0/0	11	1	87		TRUE
1	44226361	C	A	A	PASS	0/0	0/0	0/0	0/0	0/1	0/0	0/0	0/0	0/0	0/0	0/0	0/0	11	1	88		TRUE
1	44520626	C	T	T	PASS	0/0	0/0	0/0	0/0	0/0	0/0	0/1	0/0	0/0	0/0	0/0	0/0	11	1	89		TRUE
1	45425410	T	A	A	PASS	0/0	0/0	0/0	0/0	0/0	0/0	0/0	0/1	0/0	0/0	0/0	0/0	11	1	90		TRUE
1	45512649	G	T	T	PASS	0/0	0/0	0/1	0/0	0/0	0/0	0/0	0/0	0/0	0/0	0/0	0/0	11	1	91		TRUE
1	46505952	G	T	T	PASS	0/0	0/1	0/0	0/0	0/0	0/0	0/0	0/0	0/0	0/0	0/0	0/0	11	1	92		TRUE
1	46609763	A	C	C	PASS	0/0	0/0	0/0	0/0	0/1	0/0	0/0	0/0	0/0	0/0	0/0	0/0	11	1	93		TRUE
1	46967170	C	A	A	PASS	0/1	0/0	0/0	0/0	0/0	0/0	0/0	0/0	0/0	0/0	0/0	0/0	11	1	94		TRUE
1	47047825	G	A	A	PASS	0/0	0/0	0/0	0/0	0/0	0/0	0/0	0/1	0/0	0/0	0/0	0/0	11	1	95		TRUE
1	47182556	T	A	A	PASS	0/0	0/0	0/0	0/0	0/0	0/0	0/0	0/0	0/0	0/0	0/1	0/0	11	1	96		TRUE
1	47433028	G	T	T	PASS	0/0	0/0	0/0	0/0	0/0	0/0	0/0	0/1	0/0	0/0	0/0	0/0	11	1	97		TRUE
1	47662956	G	A	A	PASS	0/0	0/0	0/0	0/0	0/1	0/0	0/0	0/0	0/0	0/0	0/0	0/0	11	1	98		TRUE
1	47805275	C	A	A	PASS	0/0	1/1	0/0	0/0	0/0	0/0	0/0	0/0	0/0	0/0	0/0	0/0	11	1	99		TRUE
1	48579383	A	C	C	PASS	0/0	0/0	0/0	0/1	0/0	0/0	0/0	0/0	0/0	0/0	0/0	0/0	11	1	100		TRUE
1	48670429	G	T	T	PASS	0/1	0/0	0/0	0/0	0/0	0/0	0/0	0/0	0/0	0/0	0/0	0/0	11	1	101		TRUE
1	48805463	A	T	T	PASS	0/0	0/0	0/1	0/0	0/0	0/0	0/0	0/0	0/0	0/0	0/0	0/0	11	1	102		TRUE
1	48890232	G	C	C	PASS	0/1	0/0	0/0	0/0	0/0	0/0	0/0	0/0	0/0	0/0	0/0	0/0	11	1	103		TRUE
1	48911764	C	A	A	PASS	0/0	0/0	0/0	0/0	0/1	0/0	0/0	0/0	0/0	0/0	0/0	0/0	11	1	104		TRUE
1	49193832	A	T	T	PASS	0/0	0/0	0/1	0/0	0/0	0/0	0/0	0/0	0/0	0/0	0/0	0/0	11	1	105		TRUE
1	49290276	C	A	A	PASS	0/0	0/1	0/0	0/0	0/0	0/0	0/0	0/0	0/0	0/0	0/0	0/0	11	1	106		TRUE
1	49398121	G	A	A	PASS	0/0	0/0	0/0	0/0	0/0	0/0	0/1	0/0	0/0	0/0	0/0	0/0	11	1	107		TRUE
1	49518988	C	T	T	PASS	0/0	0/1	0/0	0/0	0/0	0/0	0/0	0/0	0/0	0/0	0/0	0/0	11	1	108		TRUE
1	49730720	G	T	T	PASS	0/0	0/0	0/0	0/0	0/0	0/0	0/0	0/1	0/0	0/0	0/0	0/0	11	1	109		TRUE
1	49817893	G	A	A	PASS	0/0	0/0	0/0	0/0	0/0	0/0	0/0	0/0	0/1	0/0	0/0	0/0	11	1	110		TRUE
1	49828142	C	T	T	PASS	0/0	0/1	0/0	0/0	0/0	0/0	0/0	0/0	0/0	0/0	0/0	0/0	11	1	111		TRUE
1	50615058	T	C	C	SNP_LowQualityDepth	0/0	0/0	0/0	0/0	0/0	0/0	0/0	0/0	0/1	0/0	0/0	0/0	11	1	FALSE	TRUE	TRUE
1	51081282	T	A	A	PASS	0/1	0/0	0/0	0/0	0/0	0/0	0/0	0/0	0/0	0/0	0/0	0/0	11	1	112		TRUE
1	52445538	T	G	G	PASS	0/0	0/0	0/0	0/0	0/1	0/0	0/0	0/0	0/0	0/0	0/0	0/0	11	1	113		TRUE
1	52558854	C	A	A	PASS	0/0	0/0	0/0	0/0	0/0	0/0	0/0	0/0	0/0	0/0	0/0	0/1	11	1	114		TRUE
1	52929095	A	T	T	PASS	0/0	0/1	0/0	0/0	0/0	0/0	0/0	0/0	0/0	0/0	0/0	0/0	11	1	115		TRUE
1	53590673	T	G	G	PASS	0/1	0/0	0/0	0/0	0/0	0/0	0/0	0/0	0/0	0/0	0/0	0/0	11	1	116		TRUE
1	53689876	C	A	A	PASS	0/0	0/0	0/0	0/0	0/0	0/1	0/0	0/0	0/0	0/0	0/0	0/0	11	1	117		TRUE
1	55296487	C	T	T	PASS	0/0	0/0	0/1	0/0	0/0	0/0	0/0	0/0	0/0	0/0	0/0	0/0	11	1	118		TRUE
1	55702401	T	C	C	PASS	0/0	0/0	0/1	0/0	0/0	0/0	0/0	0/0	0/0	0/0	0/0	0/0	11	1	119		TRUE
1	55840122	C	G	G	PASS	0/1	0/0	0/0	0/0	0/0	0/0	0/0	0/0	0/0	0/0	0/0	0/0	11	1	120		TRUE
1	57028264	T	A	A	PASS	0/0	0/0	0/0	0/1	0/0	0/0	0/0	0/0	0/0	0/0	0/0	0/0	11	1	121		TRUE
1	57120816	G	T	T	PASS	0/0	0/0	0/0	0/0	0/0	0/0	0/1	0/0	0/0	0/0	0/0	0/0	11	1	122		TRUE
1	57733668	A	C	C	PASS	0/1	0/0	0/0	0/0	0/0	0/0	0/0	0/0	0/0	0/0	0/0	0/0	11	1	123		TRUE
1	58601668	A	C	C	PASS	0/0	0/0	0/0	0/0	0/0	0/0	0/0	0/0	0/0	0/0	0/1	0/0	11	1	124		TRUE
1	59400345	T	A	#N/A	#N/A	#N/A	#N/A	#N/A	#N/A	#N/A	#N/A	#N/A	#N/A	#N/A	#N/A	#N/A	#N/A	0	0	FALSE	FALSE	FALSE
1	61327871	C	A	A	PASS	0/0	0/0	0/1	0/0	0/0	0/0	0/0	0/0	0/0	0/0	0/0	0/0	11	1	125		TRUE
1	62243392	G	A	A	PASS	0/0	0/0	0/0	0/1	0/0	0/0	0/0	0/0	0/0	0/0	0/0	0/0	11	1	126		TRUE
1	63031164	G	C	C	PASS	0/0	0/0	0/0	0/0	0/1	0/0	0/0	0/0	0/0	0/0	0/0	0/0	11	1	127		TRUE
1	63056764	A	T	T	PASS	0/0	0/0	0/1	0/0	0/0	0/0	0/0	0/0	0/0	0/0	0/0	0/0	11	1	128		TRUE
1	64129394	C	A	A	PASS	0/0	0/0	0/1	0/0	0/0	0/0	0/0	0/0	0/0	0/0	0/0	0/0	11	1	129		TRUE
1	64428345	C	A	A	PASS	0/0	0/0	0/0	0/0	0/1	0/0	0/0	0/0	0/0	0/0	0/0	0/0	11	1	130		TRUE
1	65872486	G	T	T	PASS	0/0	0/0	0/0	0/0	0/1	0/0	0/0	0/0	0/0	0/0	0/0	0/0	11	1	131		TRUE
1	66135075	C	G	G	PASS	0/0	0/0	0/0	0/1	0/0	0/0	0/0	0/0	0/0	0/0	0/0	0/0	11	1	132		TRUE
1	66225804	C	T	T	PASS	0/0	0/1	0/0	0/0	0/0	0/0	0/0	0/0	0/0	0/0	0/0	0/0	11	1	133		TRUE
1	66650075	G	T	#N/A	#N/A	#N/A	#N/A	#N/A	#N/A	#N/A	#N/A	#N/A	#N/A	#N/A	#N/A	#N/A	#N/A	0	0	FALSE	?	FALSE
1	66691060	A	G	G	PASS	0/0	0/0	0/0	0/0	0/0	0/0	0/0	0/0	0/0	0/0	0/0	0/1	11	1	134		TRUE
1	67473430	C	T	T	PASS	0/1	0/0	0/0	0/0	0/0	0/0	0/0	0/0	0/0	0/0	0/0	0/0	11	1	135		TRUE
1	68374474	T	C	C	SNP_LowQualityDepth	0/0	0/0	0/0	0/0	0/0	0/0	0/0	0/0	0/0	0/0	0/0	0/1	11	1	FALSE	TRUE	TRUE
1	68578013	G	A	A,*	PASS	0/2	0/2	0/2	0/2	0/2	0/2	0/2	0/1	0/2	0/0	0/2	0/2	1	0	FALSE	TRUE	TRUE
1	68968991	T	A	A	PASS	0/0	0/0	0/0	0/1	0/0	0/0	0/0	0/0	0/0	0/0	0/0	0/0	11	1	136		TRUE
1	69443771	G	T	T	PASS	0/0	0/0	0/0	0/0	0/0	0/0	0/0	0/1	0/0	0/0	0/0	0/0	11	1	137		TRUE
1	69539906	C	A	A	PASS	0/0	0/0	0/0	0/0	0/1	0/0	0/0	0/0	0/0	0/0	0/0	0/0	11	1	138		TRUE
1	69629580	A	G	G	PASS	0/0	0/0	0/0	0/0	0/1	0/0	0/0	0/0	0/0	0/0	0/0	0/0	11	1	139		TRUE
1	69901291	C	A	A	PASS	0/0	0/1	0/0	0/0	0/0	0/0	0/0	0/0	0/0	0/0	0/0	0/0	11	1	140		TRUE
1	69915857	T	G	G	PASS	0/0	0/1	0/0	0/0	0/0	0/0	0/0	0/0	0/0	0/0	0/0	0/0	11	1	141		TRUE
1	70194474	G	A	A	PASS	0/0	0/0	0/0	0/0	0/0	0/0	0/0	0/0	0/1	0/0	0/0	0/0	11	1	142		TRUE
1	70524205	G	T	T	PASS	0/0	0/0	0/1	0/0	0/0	0/0	0/0	0/0	0/0	0/0	0/0	0/0	11	1	143		TRUE
1	70717350	A	T	T	PASS	0/0	0/0	0/0	0/0	0/0	0/0	0/0	0/1	0/0	0/0	0/0	0/0	11	1	144		TRUE
1	70747609	A	T	T	PASS	0/0	0/0	0/0	0/0	0/1	0/0	0/0	0/0	0/0	0/0	0/0	0/0	11	1	145		TRUE
1	71709967	G	A	A	PASS	0/0	0/0	0/0	0/0	0/0	0/1	0/0	0/0	0/0	0/0	0/0	0/0	11	1	146		TRUE
1	72247201	T	G	G	PASS	0/0	0/0	0/0	0/0	0/0	0/0	0/0	0/0	0/0	0/0	0/1	0/0	11	1	147		TRUE
1	72686609	A	T	T	PASS	0/0	0/0	0/0	0/0	0/1	0/0	0/0	0/0	0/0	0/0	0/0	0/0	11	1	148		TRUE
1	72807376	C	T	T	PASS	0/0	0/0	0/0	0/0	0/0	0/0	0/1	0/0	0/0	0/0	0/0	0/0	11	1	149		TRUE
1	73894204	A	G	G	PASS	0/0	0/0	0/0	0/0	0/0	0/0	0/0	0/0	0/1	0/0	0/0	0/0	11	1	150		TRUE
1	73949376	A	G	G	PASS	0/0	0/0	0/0	0/0	0/0	0/0	0/1	0/0	0/0	0/0	0/0	0/0	11	1	151		TRUE
1	75469777	G	A	A	PASS	0/0	0/0	0/0	0/1	0/0	0/0	0/0	0/0	0/0	0/0	0/0	0/0	11	1	152		TRUE
1	75648952	G	T	T	PASS	0/0	0/0	0/0	0/0	0/0	0/0	0/0	0/1	0/0	0/0	0/0	0/0	11	1	153		TRUE
1	75751298	G	T	T	PASS	0/0	0/0	0/1	0/0	0/0	0/0	0/0	0/0	0/0	0/0	0/0	0/0	11	1	154		TRUE
1	76152923	C	A	A	PASS	0/0	0/1	0/0	0/0	0/0	0/0	0/0	0/0	0/0	0/0	0/0	0/0	11	1	155		TRUE
1	76608785	A	T	T	PASS	0/1	0/0	0/0	0/0	0/0	0/0	0/0	0/0	0/0	0/0	0/0	0/0	11	1	156		TRUE
1	77898343	T	G	G	PASS	0/0	0/0	0/0	0/0	0/0	0/1	0/0	0/0	0/0	0/0	0/0	0/0	11	1	157		TRUE
1	78628235	G	T	T	PASS	0/0	0/0	0/0	0/0	0/1	0/0	0/0	0/0	0/0	0/0	0/0	0/0	11	1	158		TRUE
1	78933198	T	A	A	PASS	0/0	0/0	0/0	0/0	0/1	0/0	0/0	0/0	0/0	0/0	0/0	0/0	11	1	159		TRUE
1	79144657	G	C	C	PASS	0/1	0/0	0/0	0/0	0/0	0/0	0/0	0/0	0/0	0/0	0/0	0/0	11	1	160		TRUE
1	80186917	C	A	A	PASS	0/0	0/0	0/0	0/1	0/0	0/0	0/0	0/0	0/0	0/0	0/0	0/0	11	1	161		TRUE
1	81037891	G	A	A	PASS	0/0	0/0	0/0	0/0	0/0	0/0	0/0	0/0	0/0	0/0	0/1	0/0	11	1	162		TRUE
1	81218738	T	A	A	PASS	0/0	0/0	0/0	0/0	0/1	0/0	0/0	0/0	0/0	0/0	0/0	0/0	11	1	163		TRUE
1	81520620	A	G	G	PASS	0/1	0/0	0/0	0/0	0/0	0/0	0/0	0/0	0/0	0/0	0/0	0/0	11	1	164		TRUE
1	81668683	A	C	#N/A	#N/A	#N/A	#N/A	#N/A	#N/A	#N/A	#N/A	#N/A	#N/A	#N/A	#N/A	#N/A	#N/A	0	0	FALSE	FALSE	FALSE
1	81748858	G	A	A	PASS	0/0	0/1	0/0	0/0	0/0	0/0	0/0	0/0	0/0	0/0	0/0	0/0	11	1	165		TRUE
1	81825137	A	G	G	PASS	0/1	0/0	0/0	0/0	0/0	0/0	0/0	0/0	0/0	0/0	0/0	0/0	11	1	166		TRUE
1	81875069	G	T	T	PASS	0/0	0/0	0/1	0/0	0/0	0/0	0/0	0/0	0/0	0/0	0/0	0/0	11	1	167		TRUE
1	81976434	T	A	A	PASS	0/1	0/0	0/0	0/0	0/0	0/0	0/0	0/0	0/0	0/0	0/0	0/0	11	1	168		TRUE
1	83756445	C	A	A	PASS	0/1	0/0	0/0	0/0	0/0	0/0	0/0	0/0	0/0	0/0	0/0	0/0	11	1	169		TRUE
1	83803132	A	C	C	PASS	0/0	0/0	0/1	0/0	0/0	0/0	0/0	0/0	0/0	0/0	0/0	0/0	11	1	170		TRUE
1	84167750	A	T	T	PASS	0/0	0/0	0/0	0/0	0/1	0/0	0/0	0/0	0/0	0/0	0/0	0/0	11	1	171		TRUE
1	84786809	C	T	T	PASS	0/0	0/0	0/0	0/0	0/0	0/0	0/0	0/0	0/1	0/0	0/0	0/0	11	1	172		TRUE
1	85193770	G	T	T	PASS	0/0	0/0	0/1	0/0	0/0	0/0	0/0	0/0	0/0	0/0	0/0	0/0	11	1	173		TRUE
1	88259088	T	G	#N/A	#N/A	#N/A	#N/A	#N/A	#N/A	#N/A	#N/A	#N/A	#N/A	#N/A	#N/A	#N/A	#N/A	0	0	FALSE	FALSE	FALSE
1	88259089	T	G	#N/A	#N/A	#N/A	#N/A	#N/A	#N/A	#N/A	#N/A	#N/A	#N/A	#N/A	#N/A	#N/A	#N/A	0	0	FALSE	FALSE	FALSE
1	89400369	G	T	T	PASS	0/0	0/0	0/0	0/0	0/0	0/0	0/0	0/0	0/1	0/0	0/0	0/0	11	1	174		TRUE
1	89549296	G	T	T	PASS	0/0	0/0	0/0	0/0	0/1	0/0	0/0	0/0	0/0	0/0	0/0	0/0	11	1	175		TRUE
1	90456888	G	A	A	PASS	0/0	0/0	0/0	0/0	0/1	0/0	0/0	0/0	0/0	0/0	0/0	0/0	11	1	176		TRUE
1	90468376	C	A	A	PASS	0/0	0/0	0/0	0/0	0/0	0/0	0/0	0/1	0/0	0/0	0/0	0/0	11	1	177		TRUE
1	94161226	G	T	T	PASS	0/0	0/0	0/1	0/0	0/0	0/0	0/0	0/0	0/0	0/0	0/0	0/0	11	1	178		TRUE
1	94565773	G	A	A	PASS	0/0	0/0	0/1	0/0	0/0	0/0	0/0	0/0	0/0	0/0	0/0	0/0	11	1	179		TRUE
1	95104210	T	A	A	PASS	0/0	0/0	0/0	0/0	0/1	0/0	0/0	0/0	0/0	0/0	0/0	0/0	11	1	180		TRUE
1	95213285	G	T	T	PASS	0/0	0/0	0/0	0/0	0/0	0/1	0/0	0/0	0/0	0/0	0/0	0/0	11	1	181		TRUE
1	96083588	G	A	A	PASS	0/0	0/0	0/0	0/0	0/1	0/0	0/0	0/0	0/0	0/0	0/0	0/0	11	1	182		TRUE
1	96136204	T	A	A	PASS	0/0	0/0	0/0	0/0	0/0	0/0	0/0	0/0	0/1	0/0	0/0	0/0	11	1	183		TRUE
1	96318044	C	T	T	PASS	0/0	0/1	0/0	0/0	0/0	0/0	0/0	0/0	0/0	0/0	0/0	0/0	11	1	184		TRUE
1	98659914	G	T	T	PASS	0/0	0/0	0/0	0/0	0/1	0/0	0/0	0/0	0/0	0/0	0/0	0/0	11	1	185		TRUE
1	98683915	T	G	G	PASS	0/0	0/0	0/1	0/0	0/0	0/0	0/0	0/0	0/0	0/0	0/0	0/0	11	1	186		TRUE
1	98910400	T	A	A	PASS	0/1	0/0	0/0	0/0	0/0	0/0	0/0	0/0	0/0	0/0	0/0	0/0	11	1	187		TRUE
1	98997426	C	T	T	PASS	0/0	0/0	0/1	0/0	0/0	0/0	0/0	0/0	0/0	0/0	0/0	0/0	11	1	188		TRUE
1	99011266	G	A	A	PASS	0/0	0/0	0/0	0/0	0/1	0/0	0/0	0/0	0/0	0/0	0/0	0/0	11	1	189		TRUE
1	99131198	G	A	A	PASS	0/0	0/0	0/0	0/0	0/0	0/1	0/0	0/0	0/0	0/0	0/0	0/0	11	1	190		TRUE
1	99624046	G	A	A	PASS	0/0	0/0	0/0	0/0	0/0	0/0	0/1	0/0	0/0	0/0	0/0	0/0	11	1	191		TRUE
1	99779227	T	C	C	PASS	0/0	0/0	0/0	0/1	0/0	0/0	0/0	0/0	0/0	0/0	0/0	0/0	11	1	192		TRUE
1	99887328	C	T	T	PASS	0/0	0/0	0/0	0/0	0/0	0/0	0/0	0/0	0/1	0/0	0/0	0/0	11	1	193		TRUE
1	100045345	A	C	C	PASS	0/0	0/0	0/1	0/0	0/0	0/0	0/0	0/0	0/0	0/0	0/0	0/0	11	1	194		TRUE
1	100604928	G	T	T	PASS	0/0	0/0	0/0	0/1	0/0	0/0	0/0	0/0	0/0	0/0	0/0	0/0	11	1	195		TRUE
1	100614204	C	A	A	PASS	0/0	0/0	0/0	0/1	0/0	0/0	0/0	0/0	0/0	0/0	0/0	0/0	11	1	196		TRUE
1	100820629	A	T	T	PASS	0/0	0/0	0/1	0/0	0/0	0/0	0/0	0/0	0/0	0/0	0/0	0/0	11	1	197		TRUE
1	100823106	A	T	T	PASS	0/0	0/0	0/1	0/0	0/0	0/0	0/0	0/0	0/0	0/0	0/0	0/0	11	1	198		TRUE
1	100941045	G	T	T	PASS	0/1	0/0	0/0	0/0	0/0	0/0	0/0	0/0	0/0	0/0	0/0	0/0	11	1	199		TRUE
1	101074194	A	G	G	PASS	0/0	0/0	0/0	0/0	0/0	0/0	0/0	0/0	0/1	0/0	0/0	0/0	11	1	200		TRUE
1	101537772	T	C	C	PASS	0/0	0/0	0/0	0/0	0/0	0/0	0/0	0/0	0/0	0/0	0/0	0/1	11	1	201		TRUE
1	101581640	C	G	G	PASS	0/0	0/0	0/1	0/0	0/0	0/0	0/0	0/0	0/0	0/0	0/0	0/0	11	1	202		TRUE
1	101822412	T	G	G	PASS	0/0	0/0	0/0	0/1	0/0	0/0	0/0	0/0	0/0	0/0	0/0	0/0	11	1	203		TRUE
1	101890845	G	T	T	PASS	0/0	0/0	0/0	0/0	0/1	0/0	0/0	0/0	0/0	0/0	0/0	0/0	11	1	204		TRUE
1	101895624	T	C	C	PASS	0/0	0/0	0/1	0/0	0/0	0/0	0/0	0/0	0/0	0/0	0/0	0/0	11	1	205		TRUE
1	101939010	C	A	A	PASS	0/0	0/0	0/1	0/0	0/0	0/0	0/0	0/0	0/0	0/0	0/0	0/0	11	1	206		TRUE
1	101946412	C	G	G	PASS	0/0	0/0	0/0	0/0	0/0	0/1	0/0	0/0	0/0	0/0	0/0	0/0	11	1	207		TRUE
1	102062675	G	A	A	PASS	0/0	0/0	0/1	0/0	0/0	0/0	0/0	0/0	0/0	0/0	0/0	0/0	11	1	208		TRUE
1	102195858	C	G	G	PASS	0/1	0/0	0/0	0/0	0/0	0/0	0/0	0/0	0/0	0/0	0/0	0/0	11	1	209		TRUE
1	102234078	C	A	A	PASS	0/0	0/0	0/0	0/0	0/0	0/0	0/0	0/1	0/0	0/0	0/0	0/0	11	1	210		TRUE
1	102665265	A	T	T	PASS	0/0	0/0	0/0	0/0	0/0	0/1	0/0	0/0	0/0	0/0	0/0	0/0	11	1	211		TRUE
1	102915598	T	A	A	PASS	0/0	0/0	0/1	0/0	0/0	0/0	0/0	0/0	0/0	0/0	0/0	0/0	11	1	212		TRUE
1	103072299	C	T	T	PASS	0/0	0/0	0/0	0/0	0/0	0/0	0/0	0/0	0/0	0/0	0/1	0/0	11	1	213		TRUE
1	103520353	A	G	G	PASS	0/0	0/0	0/0	0/0	0/1	0/0	0/0	0/0	0/0	0/0	0/0	0/0	11	1	214		TRUE
1	103989589	G	T	T	PASS	0/1	0/0	0/0	0/0	0/0	0/0	0/0	0/0	0/0	0/0	0/0	0/0	11	1	215		TRUE
1	103996692	T	C	C	PASS	0/0	0/0	0/0	0/1	0/0	0/0	0/0	0/0	0/0	0/0	0/0	0/0	11	1	216		TRUE
1	104043246	C	T	T	PASS	0/0	0/0	0/0	0/0	0/0	0/0	0/0	0/0	0/0	0/0	0/1	0/0	11	1	217		TRUE
1	104305440	G	A	A	PASS	0/0	0/0	0/0	0/1	0/0	0/0	0/0	0/0	0/0	0/0	0/0	0/0	11	1	218		TRUE
1	105331380	T	G	G	PASS	0/0	0/0	0/0	0/0	0/0	0/0	0/0	0/1	0/0	0/0	0/0	0/0	11	1	219		TRUE
1	107340742	G	A	A	PASS	0/1	0/0	0/0	0/0	0/0	0/0	0/0	0/0	0/0	0/0	0/0	0/0	11	1	220		TRUE
1	107463801	C	A	A	PASS	0/0	0/0	0/0	0/0	0/0	0/0	0/0	0/0	0/0	0/0	0/1	0/0	11	1	221		TRUE
1	108086120	G	A	A	PASS	0/0	0/0	0/0	0/0	0/0	0/0	0/0	0/0	0/1	0/0	0/0	0/0	11	1	222		TRUE
1	108161931	T	C	C	PASS	0/0	0/0	0/1	0/0	0/0	0/0	0/0	0/0	0/0	0/0	0/0	0/0	11	1	223		TRUE
1	108249763	C	A	A	PASS	0/0	0/0	0/1	0/0	0/0	0/0	0/0	0/0	0/0	0/0	0/0	0/0	11	1	224		TRUE
1	108288930	G	T	T	PASS	0/0	0/0	0/1	0/0	0/0	0/0	0/0	0/0	0/0	0/0	0/0	0/0	11	1	225		TRUE
1	108558438	C	A	A	PASS	0/0	0/0	0/0	0/1	0/0	0/0	0/0	0/0	0/0	0/0	0/0	0/0	11	1	226		TRUE
1	108872387	G	T	T	PASS	0/0	0/0	0/0	0/0	0/0	0/0	0/1	0/0	0/0	0/0	0/0	0/0	11	1	227		TRUE
1	108922167	T	C	C	PASS	0/0	0/0	0/1	0/0	0/0	0/0	0/0	0/0	0/0	0/0	0/0	0/0	11	1	228		TRUE
1	109137848	A	C	C	PASS	0/1	0/0	0/0	0/0	0/0	0/0	0/0	0/0	0/0	0/0	0/0	0/0	11	1	229		TRUE
1	109253006	A	G	G	PASS	0/1	0/0	0/0	0/0	0/0	0/0	0/0	0/0	0/0	0/0	0/0	0/0	11	1	230		TRUE
1	109259472	G	A	#N/A	#N/A	#N/A	#N/A	#N/A	#N/A	#N/A	#N/A	#N/A	#N/A	#N/A	#N/A	#N/A	#N/A	0	0	FALSE	?	FALSE
1	109288931	G	A	A	PASS	0/0	0/0	0/1	0/0	0/0	0/0	0/0	0/0	0/0	0/0	0/0	0/0	11	1	231		TRUE
1	109370685	A	T	T	PASS	0/0	0/1	0/0	0/0	0/0	0/0	0/0	0/0	0/0	0/0	0/0	0/0	11	1	232		TRUE
1	109431923	G	A	A	PASS	0/0	0/0	0/0	0/0	0/0	0/0	0/0	0/0	0/0	0/0	0/0	0/1	11	1	233		TRUE
1	109549711	A	T	T	PASS	0/0	0/0	0/1	0/0	0/0	0/0	0/0	0/0	0/0	0/0	0/0	0/0	11	1	234		TRUE
1	109600261	A	C	C	PASS	0/0	0/0	0/1	0/0	0/0	0/0	0/0	0/0	0/0	0/0	0/0	0/0	11	1	235		TRUE
1	109643548	G	A	A	PASS	0/0	0/1	0/0	0/0	0/0	0/0	0/0	0/0	0/0	0/0	0/0	0/0	11	1	236		TRUE
1	110247616	C	T	T	PASS	0/0	0/0	0/1	0/0	0/0	0/0	0/0	0/0	0/0	0/0	0/0	0/0	11	1	237		TRUE
1	110548380	G	T	T	PASS	0/0	0/0	0/0	0/0	0/0	0/0	0/0	0/0	0/1	0/0	0/0	0/0	11	1	238		TRUE
1	110760230	C	A	A	PASS	0/0	0/0	0/1	0/0	0/0	0/0	0/0	0/0	0/0	0/0	0/0	0/0	11	1	239		TRUE
1	111093687	T	G	G	PASS	0/0	0/0	0/1	0/0	0/0	0/0	0/0	0/0	0/0	0/0	0/0	0/0	11	1	240		TRUE
1	111268201	G	T	T	PASS	0/0	0/0	0/0	0/0	0/0	0/0	0/1	0/0	0/0	0/0	0/0	0/0	11	1	241		TRUE
1	111604158	T	A	A	PASS	0/0	0/0	0/0	0/0	0/0	0/0	0/0	0/0	0/0	0/0	0/0	0/1	11	1	242		TRUE
1	112030052	G	C	C	PASS	0/0	0/0	0/0	0/0	0/0	0/0	0/0	0/0	0/1	0/0	0/0	0/0	11	1	243		TRUE
1	112453589	T	G	G	PASS	0/1	0/0	0/0	0/0	0/0	0/0	0/0	0/0	0/0	0/0	0/0	0/0	11	1	244		TRUE
1	112559407	C	T	T	PASS	0/1	0/0	0/0	0/0	0/0	0/0	0/0	0/0	0/0	0/0	0/0	0/0	11	1	245		TRUE
1	112636176	A	G	G	PASS	0/0	0/0	0/0	0/0	0/0	0/0	0/0	0/0	0/0	0/0	0/0	0/1	11	1	246		TRUE
1	112724481	C	T	T	PASS	0/0	0/0	0/0	0/1	0/0	0/0	0/0	0/0	0/0	0/0	0/0	0/0	11	1	247		TRUE
1	113202204	A	G	G	PASS	0/0	0/0	0/0	0/1	0/0	0/0	0/0	0/0	0/0	0/0	0/0	0/0	11	1	248		TRUE
1	113309326	G	A	A	PASS	0/0	0/0	0/0	0/0	0/1	0/0	0/0	0/0	0/0	0/0	0/0	0/0	11	1	249		TRUE
1	113540109	T	C	C	PASS	0/0	0/0	0/0	0/0	0/0	0/0	0/0	0/0	0/0	0/0	0/1	0/0	11	1	250		TRUE
1	114199867	A	G	G	PASS	0/0	0/0	0/0	0/0	0/0	0/0	0/0	0/1	0/0	0/0	0/0	0/0	11	1	251		TRUE
1	114218649	C	T	T	PASS	0/0	0/0	0/0	0/0	0/0	0/1	0/0	0/0	0/0	0/0	0/0	0/0	11	1	252		TRUE
1	114355422	C	A	A	PASS	0/1	0/0	0/0	0/0	0/0	0/0	0/0	0/0	0/0	0/0	0/0	0/0	11	1	253		TRUE
1	114751999	A	G	G	PASS	0/0	0/0	0/0	0/1	0/0	0/0	0/0	0/0	0/0	0/0	0/0	0/0	11	1	254		TRUE
1	115185516	C	A	A	PASS	0/0	0/1	0/0	0/0	0/0	0/0	0/0	0/0	0/0	0/0	0/0	0/0	11	1	255		TRUE
1	115716277	T	G	G	PASS	0/0	0/0	0/0	0/0	0/1	0/0	0/0	0/0	0/0	0/0	0/0	0/0	11	1	256		TRUE
1	115960005	G	A	A	PASS	0/0	0/1	0/0	0/0	0/0	0/0	0/0	0/0	0/0	0/0	0/0	0/0	11	1	257		TRUE
1	116179961	G	T	T	PASS	0/0	0/0	0/0	0/0	0/0	0/0	0/1	0/0	0/0	0/0	0/0	0/0	11	1	258		TRUE
1	116220948	G	A	A	PASS	0/0	0/0	0/0	0/0	0/1	0/0	0/0	0/0	0/0	0/0	0/0	0/0	11	1	259		TRUE
1	116574978	G	T	T	PASS	0/0	0/0	0/0	0/0	0/0	0/0	0/1	0/0	0/0	0/0	0/0	0/0	11	1	260		TRUE
1	116850878	T	C	C	PASS	0/0	0/0	0/0	0/0	0/1	0/0	0/0	0/0	0/0	0/0	0/0	0/0	11	1	261		TRUE
1	117530672	T	A	A	PASS	0/0	0/0	0/1	0/0	0/0	0/0	0/0	0/0	0/0	0/0	0/0	0/0	11	1	262		TRUE
1	117640690	C	T	T	PASS	0/0	0/0	0/1	0/0	0/0	0/0	0/0	0/0	0/0	0/0	0/0	0/0	11	1	263		TRUE
1	118074573	G	C	C	SnpCluster	0/0	0/0	0/0	0/0	0/0	0/0	0/0	0/0	0/0	0/0	0/1	0/0	11	1	FALSE	TRUE	TRUE
1	118199667	A	T	T	PASS	0/0	0/0	0/1	0/0	0/0	0/0	0/0	0/0	0/0	0/0	0/0	0/0	11	1	264		TRUE
1	118849439	C	A	A	PASS	0/1	0/0	0/0	0/0	0/0	0/0	0/0	0/0	0/0	0/0	0/0	0/0	11	1	265		TRUE
1	119059081	C	A	A	PASS	0/0	0/0	0/0	0/0	0/0	0/0	0/1	0/0	0/0	0/0	0/0	0/0	11	1	266		TRUE
1	119732861	A	T	T	PASS	0/0	0/0	0/0	0/0	0/0	0/1	0/0	0/0	0/0	0/0	0/0	0/0	11	1	267		TRUE
1	119784286	C	T	T	PASS	0/1	0/0	0/0	0/0	0/0	0/0	0/0	0/0	0/0	0/0	0/0	0/0	11	1	268		TRUE
1	120161096	G	A	A	PASS	0/1	0/0	0/0	0/0	0/0	0/0	0/0	0/0	0/0	0/0	0/0	0/0	11	1	269		TRUE
1	121170798	G	T	T	PASS	0/1	0/0	0/0	0/0	0/0	0/0	0/0	0/0	0/0	0/0	0/0	0/0	11	1	270		TRUE
1	121688501	C	A	A	PASS	0/0	0/0	0/0	0/0	0/0	0/0	0/0	0/0	0/0	0/0	0/0	0/1	11	1	271		TRUE
1	121921807	C	T	T	PASS	0/0	0/0	0/0	0/0	0/0	0/0	0/0	0/0	0/0	0/0	0/1	0/0	11	1	272		TRUE
1	122324114	C	G	G	PASS	0/0	0/0	0/0	0/0	0/1	0/0	0/0	0/0	0/0	0/0	0/0	0/0	11	1	273		TRUE
1	122354070	C	T	#N/A	#N/A	#N/A	#N/A	#N/A	#N/A	#N/A	#N/A	#N/A	#N/A	#N/A	#N/A	#N/A	#N/A	0	0	FALSE	FALSE	FALSE
1	122403755	G	T	T	PASS	0/0	0/0	0/1	0/0	0/0	0/0	0/0	0/0	0/0	0/0	0/0	0/0	11	1	274		TRUE
1	122454839	T	A	A	PASS	0/0	0/0	0/1	0/0	0/0	0/0	0/0	0/0	0/0	0/0	0/0	0/0	11	1	275		TRUE
1	122549312	G	A	A	PASS	0/0	0/0	0/0	0/0	0/0	0/0	0/0	0/0	0/0	0/0	0/1	0/0	11	1	276		TRUE
1	122584924	C	A	A	PASS	0/0	0/0	0/0	0/0	0/0	0/0	0/0	0/0	0/0	0/0	0/1	0/0	11	1	277		TRUE
1	122669844	G	T	T	PASS	0/0	0/0	0/0	0/0	0/0	0/1	0/0	0/0	0/0	0/0	0/0	0/0	11	1	278		TRUE
1	122858723	A	G	G	PASS	0/0	0/0	0/0	0/0	0/0	0/0	0/0	0/0	0/0	0/0	0/1	0/0	11	1	279		TRUE
1	123105303	T	C	C	PASS	0/0	0/0	0/0	0/0	0/0	0/0	0/0	0/0	0/0	0/0	0/1	0/0	11	1	280		TRUE
1	123111945	T	C	C	PASS	0/0	0/0	0/0	0/0	0/0	0/0	0/0	0/0	0/0	0/0	0/1	0/0	11	1	281		TRUE
1	123377365	T	G	#N/A	#N/A	#N/A	#N/A	#N/A	#N/A	#N/A	#N/A	#N/A	#N/A	#N/A	#N/A	#N/A	#N/A	0	0	FALSE	FALSE	FALSE
1	123428099	T	A	A	PASS	0/1	0/0	0/0	0/0	0/0	0/0	0/0	0/0	0/0	0/0	0/0	0/0	11	1	282		TRUE
1	123902220	C	T	T	PASS	0/0	0/0	0/0	0/0	0/0	0/0	0/0	0/1	0/0	0/0	0/0	0/0	11	1	283		TRUE
1	124073004	C	A	A	PASS	0/0	0/0	0/0	0/0	0/0	0/0	0/0	0/1	0/0	0/0	0/0	0/0	11	1	284		TRUE
1	125066716	G	T	#N/A	#N/A	#N/A	#N/A	#N/A	#N/A	#N/A	#N/A	#N/A	#N/A	#N/A	#N/A	#N/A	#N/A	0	0	FALSE	TRUE	TRUE
1	125266606	G	T	T	PASS	0/0	0/0	0/1	0/0	0/0	0/0	0/0	0/0	0/0	0/0	0/0	0/0	11	1	285		TRUE
1	126208131	G	A	A	PASS	0/1	0/0	0/0	0/0	0/0	0/0	0/0	0/0	0/0	0/0	0/0	0/0	11	1	286		TRUE
1	126401141	T	A	A	PASS	0/1	0/0	0/0	0/0	0/0	0/0	0/0	0/0	0/0	0/0	0/0	0/0	11	1	287		TRUE
1	126560526	G	A	A	PASS	0/0	0/0	0/0	0/0	0/0	0/0	0/0	0/1	0/0	0/0	0/0	0/0	11	1	288		TRUE
1	126930543	G	C	C	PASS	0/0	0/0	0/1	0/0	0/0	0/0	0/0	0/0	0/0	0/0	0/0	0/0	11	1	289		TRUE
1	127179045	G	A	A	PASS	0/0	0/0	0/1	0/0	0/0	0/0	0/0	0/0	0/0	0/0	0/0	0/0	11	1	290		TRUE
1	127410601	G	A	A	PASS	0/1	0/0	0/0	0/0	0/0	0/0	0/0	0/0	0/0	0/0	0/0	0/0	11	1	291		TRUE
1	128090282	G	A	A	PASS	0/0	0/0	0/0	0/0	0/1	0/0	0/0	0/0	0/0	0/0	0/0	0/0	11	1	292		TRUE
1	129548803	C	A	A	PASS	0/0	0/0	0/0	0/0	0/1	0/0	0/0	0/0	0/0	0/0	0/0	0/0	11	1	293		TRUE
1	129781740	C	A	A	PASS	0/0	0/0	0/0	0/0	0/0	0/0	0/0	0/1	0/0	0/0	0/0	0/0	11	1	294		TRUE
1	131515820	G	A	A	PASS	0/0	0/0	0/1	0/0	0/0	0/0	0/0	0/0	0/0	0/0	0/0	0/0	11	1	295		TRUE
1	131957068	G	T	T	PASS	0/0	0/0	0/0	0/0	0/0	0/0	0/0	0/0	0/0	0/0	0/1	0/0	11	1	296		TRUE
1	133171546	C	T	T	PASS	0/0	0/0	0/0	0/0	0/0	0/0	0/0	0/0	0/0	0/0	0/1	0/0	11	1	297		TRUE
1	133260444	G	T	T	PASS	0/0	0/1	0/0	0/0	0/0	0/0	0/0	0/0	0/0	0/0	0/0	0/0	11	1	298		TRUE
1	133975360	C	A	A	PASS	0/1	0/0	0/0	0/0	0/0	0/0	0/0	0/0	0/0	0/0	0/0	0/0	11	1	299		TRUE
1	136140050	C	A	A	PASS	0/0	0/0	0/1	0/0	0/0	0/0	0/0	0/0	0/0	0/0	0/0	0/0	11	1	300		TRUE
1	137255800	T	A	A	PASS	0/0	0/0	0/0	0/0	0/0	0/0	0/0	0/0	0/0	0/0	0/1	0/0	11	1	301		TRUE
1	138515664	G	A	A	PASS	0/0	0/1	0/0	0/0	0/0	0/0	0/0	0/0	0/0	0/0	0/0	0/0	11	1	302		TRUE
1	139970772	C	T	T	PASS	0/0	0/0	0/0	0/0	0/0	0/0	0/0	0/0	0/1	0/0	0/0	0/0	11	1	303		TRUE
1	140184620	T	G	G	PASS	0/1	0/0	0/0	0/0	0/0	0/0	0/0	0/0	0/0	0/0	0/0	0/0	11	1	304		TRUE
1	140241236	C	G	G	PASS	0/0	0/0	0/0	0/0	0/1	0/0	0/0	0/0	0/0	0/0	0/0	0/0	11	1	305		TRUE
1	140395679	A	G	G	PASS	0/0	0/0	0/0	0/0	0/0	0/0	0/0	0/0	0/0	0/0	0/0	0/1	11	1	306		TRUE
1	140611614	G	A	A	PASS	0/0	0/0	0/0	0/0	0/0	0/1	0/0	0/0	0/0	0/0	0/0	0/0	11	1	307		TRUE
1	141228263	T	A	A	PASS	0/0	0/1	0/0	0/0	0/0	0/0	0/0	0/0	0/0	0/0	0/0	0/0	11	1	308		TRUE
1	142438668	T	A	A	PASS	0/0	0/0	0/0	0/0	0/1	0/0	0/0	0/0	0/0	0/0	0/0	0/0	11	1	309		TRUE
1	142440337	T	C	C	PASS	0/0	0/0	0/0	0/0	0/0	0/0	0/0	0/0	0/1	0/0	0/0	0/0	11	1	310		TRUE
1	142998135	G	T	T	PASS	0/1	0/0	0/0	0/0	0/0	0/0	0/0	0/0	0/0	0/0	0/0	0/0	11	1	311		TRUE
1	144726449	C	T	T	PASS	0/0	0/1	0/0	0/0	0/0	0/0	0/0	0/0	0/0	0/0	0/0	0/0	11	1	312		TRUE
1	144901305	C	A	A	PASS	0/0	0/0	0/0	0/0	0/0	0/0	0/0	0/0	0/1	0/0	0/0	0/0	11	1	313		TRUE
1	144931725	G	A	A	PASS	0/0	0/0	0/0	0/0	0/0	0/0	0/0	0/0	0/0	0/0	0/1	0/0	11	1	314		TRUE
1	145083829	C	G	G	PASS	0/0	0/0	0/1	0/0	0/0	0/0	0/0	0/0	0/0	0/0	0/0	0/0	11	1	315		TRUE
1	146178590	T	G	G	PASS	0/0	0/0	0/0	0/1	0/0	0/0	0/0	0/0	0/0	0/0	0/0	0/0	11	1	316		TRUE
1	146520999	C	A	A	PASS	0/1	0/0	0/0	0/0	0/0	0/0	0/0	0/0	0/0	0/0	0/0	0/0	11	1	317		TRUE
1	146716353	C	T	T	PASS	0/0	0/0	0/0	0/0	0/0	0/0	0/1	0/0	0/0	0/0	0/0	0/0	11	1	318		TRUE
1	146774824	C	A	A	PASS	0/0	0/0	0/1	0/0	0/0	0/0	0/0	0/0	0/0	0/0	0/0	0/0	11	1	319		TRUE
1	147106585	C	T	T	PASS	0/0	0/0	0/1	0/0	0/0	0/0	0/0	0/0	0/0	0/0	0/0	0/0	11	1	320		TRUE
1	147109284	C	A	A	PASS	0/0	0/0	0/0	0/0	0/0	0/0	0/0	0/0	0/0	0/0	0/1	0/0	11	1	321		TRUE
1	147296341	G	T	T	PASS	0/0	0/1	0/0	0/0	0/0	0/0	0/0	0/0	0/0	0/0	0/0	0/0	11	1	322		TRUE
1	147457340	C	A	A	PASS	0/0	0/0	0/1	0/0	0/0	0/0	0/0	0/0	0/0	0/0	0/0	0/0	11	1	323		TRUE
1	147474623	G	T	T	PASS	0/1	0/0	0/0	0/0	0/0	0/0	0/0	0/0	0/0	0/0	0/0	0/0	11	1	324		TRUE
1	147946606	G	A	A	PASS	0/0	0/0	0/0	0/0	0/0	0/0	0/0	0/0	0/1	0/0	0/0	0/0	11	1	325		TRUE
1	148316993	G	T	T	PASS	0/0	0/0	0/0	0/0	0/0	0/0	0/0	0/0	0/0	0/0	0/1	0/0	11	1	326		TRUE
1	148888866	G	T	T	PASS	0/0	0/0	0/1	0/0	0/0	0/0	0/0	0/0	0/0	0/0	0/0	0/0	11	1	327		TRUE
1	150925241	A	G	G	PASS	0/0	0/1	0/0	0/0	0/0	0/0	0/0	0/0	0/0	0/0	0/0	0/0	11	1	328		TRUE
1	152061455	C	A	A	PASS	0/0	0/0	0/0	0/0	0/1	0/0	0/0	0/0	0/0	0/0	0/0	0/0	11	1	329		TRUE
1	152149390	C	G	G	PASS	0/1	0/0	0/0	0/0	0/0	0/0	0/0	0/0	0/0	0/0	0/0	0/0	11	1	330		TRUE
1	153238370	G	T	T	PASS	0/0	0/0	0/0	0/0	0/1	0/0	0/0	0/0	0/0	0/0	0/0	0/0	11	1	331		TRUE
1	153863808	G	A	A	PASS	0/0	0/0	0/0	0/0	0/0	0/0	0/0	0/0	0/1	0/0	0/0	0/0	11	1	332		TRUE
1	154347682	C	T	T	PASS	0/0	0/0	0/0	0/1	0/0	0/0	0/0	0/0	0/0	0/0	0/0	0/0	11	1	333		TRUE
1	154386574	G	T	T	PASS	0/0	0/0	0/0	0/0	0/1	0/0	0/0	0/0	0/0	0/0	0/0	0/0	11	1	334		TRUE
1	154432854	T	G	G	PASS	0/0	0/0	0/0	0/0	0/0	0/0	0/0	0/1	0/0	0/0	0/0	0/0	11	1	335		TRUE
1	156465402	A	T	T	PASS	0/0	0/0	0/1	0/0	0/0	0/0	0/0	0/0	0/0	0/0	0/0	0/0	11	1	336		TRUE
1	156474441	C	A	A	PASS	0/1	0/0	0/0	0/0	0/0	0/0	0/0	0/0	0/0	0/0	0/0	0/0	11	1	337		TRUE
1	157713290	T	C	C	PASS	0/1	0/0	0/0	0/0	0/0	0/0	0/0	0/0	0/0	0/0	0/0	0/0	11	1	338		TRUE
1	158197506	G	T	T	PASS	0/0	0/0	0/0	0/0	0/0	0/0	0/0	0/0	0/0	0/0	0/1	0/0	11	1	339		TRUE
1	159049418	G	A	A	PASS	0/0	0/0	0/1	0/0	0/0	0/0	0/0	0/0	0/0	0/0	0/0	0/0	11	1	340		TRUE
1	159363052	A	C	#N/A	#N/A	#N/A	#N/A	#N/A	#N/A	#N/A	#N/A	#N/A	#N/A	#N/A	#N/A	#N/A	#N/A	0	0	FALSE	TRUE	TRUE
1	159671734	A	G	G,*	PASS	0/1	0/2	0/2	0/1	0/2	1/2	0/2	0/2	0/0	0/2	0/2	0/2	1	0	FALSE	TRUE	TRUE
1	160591764	G	T	T	PASS	0/0	0/0	0/1	0/0	0/0	0/0	0/0	0/0	0/0	0/0	0/0	0/0	11	1	341		TRUE
1	160833772	C	T	T	PASS	0/0	0/0	0/0	0/0	0/0	0/0	0/0	0/0	0/1	0/0	0/0	0/0	11	1	342		TRUE
1	162023252	G	T	T	PASS	0/1	0/0	0/0	0/0	0/0	0/0	0/0	0/0	0/0	0/0	0/0	0/0	11	1	343		TRUE
1	163033871	C	A	A	PASS	0/1	0/0	0/0	0/0	0/0	0/0	0/0	0/0	0/0	0/0	0/0	0/0	11	1	344		TRUE
1	165124889	G	A	A	PASS	0/0	0/0	0/0	0/0	0/0	0/0	0/0	0/0	0/0	0/0	0/1	0/0	11	1	345		TRUE
1	165263037	G	A	A	PASS	0/0	0/0	0/0	0/0	0/0	0/0	0/0	0/1	0/0	0/0	0/0	0/0	11	1	346		TRUE
1	165867971	A	G	G	PASS	0/0	0/1	0/0	0/0	0/0	0/0	0/0	0/0	0/0	0/0	0/0	0/0	11	1	347		TRUE
1	166307060	C	A	A	PASS	0/0	0/0	0/1	0/0	0/0	0/0	0/0	0/0	0/0	0/0	0/0	0/0	11	1	348		TRUE
1	166905836	G	A	A	PASS	0/1	0/0	0/0	0/0	0/0	0/0	0/0	0/0	0/0	0/0	0/0	0/0	11	1	349		TRUE
1	169949514	A	C	C	PASS	0/0	0/1	0/0	0/0	0/0	0/0	0/0	0/0	0/0	0/0	0/0	0/0	11	1	350		TRUE
1	170325321	G	A	A	PASS	0/0	0/0	0/0	0/0	0/1	0/0	0/0	0/0	0/0	0/0	0/0	0/0	11	1	351		TRUE
1	170470680	G	A	A	PASS	0/0	0/1	0/0	0/0	0/0	0/0	0/0	0/0	0/0	0/0	0/0	0/0	11	1	352		TRUE
1	171924421	C	G	G	PASS	0/0	0/0	0/0	0/0	0/0	0/1	0/0	0/0	0/0	0/0	0/0	0/0	11	1	353		TRUE
1	172467975	C	A	A	PASS	0/0	0/0	0/0	0/0	0/0	0/0	0/0	0/1	0/0	0/0	0/0	0/0	11	1	354		TRUE
1	173439169	G	A	A	PASS	0/1	0/0	0/0	0/0	0/0	0/0	0/0	0/0	0/0	0/0	0/0	0/0	11	1	355		TRUE
1	173949297	A	T	T	PASS	0/0	0/0	0/0	0/0	0/1	0/0	0/0	0/0	0/0	0/0	0/0	0/0	11	1	356		TRUE
1	175910283	G	A	A	PASS	0/0	0/0	0/0	0/0	0/0	0/0	0/0	0/1	0/0	0/0	0/0	0/0	11	1	357		TRUE
1	176280178	G	T	T	PASS	0/0	0/0	0/0	0/0	0/0	0/0	0/0	0/0	0/0	0/0	1/1	0/0	11	1	358		TRUE
1	176295699	C	A	A	PASS	0/0	0/0	0/0	0/0	0/0	0/0	0/0	0/0	0/0	0/0	0/1	0/0	11	1	359		TRUE
1	177237186	G	T	T	PASS	0/0	0/0	0/1	0/0	0/0	0/0	0/0	0/0	0/0	0/0	0/0	0/0	11	1	360		TRUE
1	177642848	G	C	C	PASS	0/0	0/0	0/0	0/0	0/1	0/0	0/0	0/0	0/0	0/0	0/0	0/0	11	1	361		TRUE
1	177783185	T	A	A	PASS	0/0	0/0	0/0	0/0	0/0	0/0	0/0	0/0	0/0	0/0	0/1	0/0	11	1	362		TRUE
1	178300392	G	A	#N/A	#N/A	#N/A	#N/A	#N/A	#N/A	#N/A	#N/A	#N/A	#N/A	#N/A	#N/A	#N/A	#N/A	0	0	FALSE	FALSE	FALSE
1	180349918	C	A	A	PASS	0/0	0/0	0/0	0/0	0/0	0/0	0/0	0/0	0/1	0/0	0/0	0/0	11	1	363		TRUE
1	181229113	G	C	C	PASS	0/0	0/0	0/0	0/0	0/0	0/0	0/0	0/1	0/0	0/0	0/0	0/0	11	1	364		TRUE
1	181873645	G	T	T	PASS	0/0	0/0	0/0	0/0	0/1	0/0	0/0	0/0	0/0	0/0	0/0	0/0	11	1	365		TRUE
1	184225870	C	A	A	PASS	0/1	0/0	0/0	0/0	0/0	0/0	0/0	0/0	0/0	0/0	0/0	0/0	11	1	366		TRUE
1	184792631	G	T	T	PASS	0/1	0/0	0/0	0/0	0/0	0/0	0/0	0/0	0/0	0/0	0/0	0/0	11	1	367		TRUE
1	185814017	C	A	A	PASS	0/0	0/0	0/0	0/0	0/0	0/0	0/0	0/0	0/1	0/0	0/0	0/0	11	1	368		TRUE
1	186056182	G	T	T	PASS	0/1	0/0	0/0	0/0	0/0	0/0	0/0	0/0	0/0	0/0	0/0	0/0	11	1	369		TRUE
1	186368667	C	A	A	PASS	0/0	0/0	0/0	0/0	0/0	0/1	0/0	0/0	0/0	0/0	0/0	0/0	11	1	370		TRUE
1	187302761	C	T	T	PASS	0/0	0/0	0/0	0/0	0/0	0/0	0/0	0/0	0/0	0/0	0/1	0/0	11	1	371		TRUE
1	188219541	G	A	A	PASS	0/0	0/0	0/0	0/0	0/0	0/0	0/0	0/0	0/0	0/0	0/0	0/1	11	1	372		TRUE
1	189829569	A	T	T	PASS	0/1	0/0	0/0	0/0	0/0	0/0	0/0	0/0	0/0	0/0	0/0	0/0	11	1	373		TRUE
1	191824071	G	T	T	PASS	0/0	0/0	0/0	0/0	0/1	0/0	0/0	0/0	0/0	0/0	0/0	0/0	11	1	374		TRUE
1	193940904	A	T	T	PASS	0/0	0/0	0/0	0/0	0/1	0/0	0/0	0/0	0/0	0/0	0/0	0/0	11	1	375		TRUE
2	4362771	T	C	C	PASS	0/1	0/0	0/0	0/0	0/0	0/0	0/0	0/0	0/0	0/0	0/0	0/0	11	1	376		TRUE
2	4413060	C	A	A	PASS	0/0	0/0	0/0	0/0	0/0	0/1	0/0	0/0	0/0	0/0	0/0	0/0	11	1	377		TRUE
2	4673266	C	A	A	PASS	0/0	0/1	0/0	0/0	0/0	0/0	0/0	0/0	0/0	0/0	0/0	0/0	11	1	378		TRUE
2	4931872	G	C	C	PASS	0/0	0/0	0/0	0/0	0/0	0/1	0/0	0/0	0/0	0/0	0/0	0/0	11	1	379		TRUE
2	5303665	T	C	C	PASS	0/0	0/1	0/0	0/0	0/0	0/0	0/0	0/0	0/0	0/0	0/0	0/0	11	1	380		TRUE
2	7073625	G	A	A	PASS	0/1	0/0	0/0	0/0	0/0	0/0	0/0	0/0	0/0	0/0	0/0	0/0	11	1	381		TRUE
2	7285505	G	T	T	PASS	0/0	0/0	0/1	0/0	0/0	0/0	0/0	0/0	0/0	0/0	0/0	0/0	11	1	382		TRUE
2	7546112	C	A	A	PASS	0/0	0/0	0/0	0/0	0/1	0/0	0/0	0/0	0/0	0/0	0/0	0/0	11	1	383		TRUE
2	7579419	A	T	T	PASS	0/0	0/0	0/0	0/1	0/0	0/0	0/0	0/0	0/0	0/0	0/0	0/0	11	1	384		TRUE
2	7845435	T	A	A	PASS	0/0	0/0	0/1	0/0	0/0	0/0	0/0	0/0	0/0	0/0	0/0	0/0	11	1	385		TRUE
2	7983005	C	A	A	PASS	0/1	0/0	0/0	0/0	0/0	0/0	0/0	0/0	0/0	0/0	0/0	0/0	11	1	386		TRUE
2	8089046	C	T	T	PASS	0/0	0/0	0/0	0/0	0/1	0/0	0/0	0/0	0/0	0/0	0/0	0/0	11	1	387		TRUE
2	8137718	C	G	G	PASS	0/0	0/0	0/1	0/0	0/0	0/0	0/0	0/0	0/0	0/0	0/0	0/0	11	1	388		TRUE
2	8166534	C	A	A	PASS	0/0	0/0	0/0	0/0	0/0	0/1	0/0	0/0	0/0	0/0	0/0	0/0	11	1	389		TRUE
2	8366536	C	A	A	PASS	0/1	0/0	0/0	0/0	0/0	0/0	0/0	0/0	0/0	0/0	0/0	0/0	11	1	390		TRUE
2	8554133	A	C	C	PASS	0/1	0/0	0/0	0/0	0/0	0/0	0/0	0/0	0/0	0/0	0/0	0/0	11	1	391		TRUE
2	8766668	C	A	A	PASS	0/0	0/0	0/0	0/1	0/0	0/0	0/0	0/0	0/0	0/0	0/0	0/0	11	1	392		TRUE
2	9050622	C	A	A	PASS	0/0	0/0	0/0	0/0	0/0	0/0	0/0	0/1	0/0	0/0	0/0	0/0	11	1	393		TRUE
2	10187232	G	T	T	PASS	0/0	0/0	0/0	0/0	0/1	0/0	0/0	0/0	0/0	0/0	0/0	0/0	11	1	394		TRUE
2	12569309	C	G	G	PASS	0/0	0/0	0/0	0/0	0/0	0/0	0/0	0/0	0/0	0/0	0/1	0/0	11	1	395		TRUE
2	12707300	C	T	T	PASS	0/0	0/0	0/0	0/0	0/0	0/0	0/1	0/0	0/0	0/0	0/0	0/0	11	1	396		TRUE
2	13636141	C	A	A	PASS	0/0	0/0	0/0	0/0	0/0	0/0	0/0	0/1	0/0	0/0	0/0	0/0	11	1	397		TRUE
2	13672823	G	T	T	PASS	0/0	0/0	0/0	0/0	0/0	0/0	0/1	0/0	0/0	0/0	0/0	0/0	11	1	398		TRUE
2	14332510	G	A	A	PASS	0/1	0/0	0/0	0/0	0/0	0/0	0/0	0/0	0/0	0/0	0/0	0/0	11	1	399		TRUE
2	14495950	C	A	A	PASS	0/0	0/0	0/0	0/0	0/1	0/0	0/0	0/0	0/0	0/0	0/0	0/0	11	1	400		TRUE
2	14597204	C	T	#N/A	#N/A	#N/A	#N/A	#N/A	#N/A	#N/A	#N/A	#N/A	#N/A	#N/A	#N/A	#N/A	#N/A	0	0	FALSE	?	FALSE
2	14945306	C	T	T	PASS	0/1	0/0	0/0	0/0	0/0	0/0	0/0	0/0	0/0	0/0	0/0	0/0	11	1	401		TRUE
2	15468009	G	A	A	PASS	0/0	0/0	0/1	0/0	0/0	0/0	0/0	0/0	0/0	0/0	0/0	0/0	11	1	402		TRUE
2	15472347	T	A	A	PASS	0/0	0/0	0/1	0/0	0/0	0/0	0/0	0/0	0/0	0/0	0/0	0/0	11	1	403		TRUE
2	15665647	A	T	T	PASS	0/0	0/0	0/0	0/0	0/0	0/0	0/0	0/1	0/0	0/0	0/0	0/0	11	1	404		TRUE
2	15922094	G	T	T	PASS	0/0	0/0	0/0	0/0	0/1	0/0	0/0	0/0	0/0	0/0	0/0	0/0	11	1	405		TRUE
2	15961899	C	G	G	PASS	0/1	0/0	0/0	0/0	0/0	0/0	0/0	0/0	0/0	0/0	0/0	0/0	11	1	406		TRUE
2	16477434	C	T	T	PASS	0/0	0/0	0/0	0/0	0/0	0/1	0/0	0/0	0/0	0/0	0/0	0/0	11	1	407		TRUE
2	16593045	C	A	A	PASS	0/1	0/0	0/0	0/0	0/0	0/0	0/0	0/0	0/0	0/0	0/0	0/0	11	1	408		TRUE
2	16670756	G	A	A	PASS	0/0	0/0	0/0	0/0	0/0	0/0	0/0	0/1	0/0	0/0	0/0	0/0	11	1	409		TRUE
2	17286330	T	C	C	PASS	0/0	0/0	0/0	0/0	0/0	0/0	0/0	0/0	0/1	0/0	0/0	0/0	11	1	410		TRUE
2	18714379	A	C	C	PASS	0/0	0/0	0/1	0/0	0/0	0/0	0/0	0/0	0/0	0/0	0/0	0/0	11	1	411		TRUE
2	18808192	G	T	T	PASS	0/0	0/0	0/0	0/0	0/0	0/0	0/0	0/1	0/0	0/0	0/0	0/0	11	1	412		TRUE
2	19252284	G	C	C	PASS	0/0	0/1	0/0	0/0	0/0	0/0	0/0	0/0	0/0	0/0	0/0	0/0	11	1	413		TRUE
2	19545747	A	G	G	PASS	0/0	0/0	0/0	0/1	0/0	0/0	0/0	0/0	0/0	0/0	0/0	0/0	11	1	414		TRUE
2	20711931	G	A	A	PASS	0/1	0/0	0/0	0/0	0/0	0/0	0/0	0/0	0/0	0/0	0/0	0/0	11	1	415		TRUE
2	21727183	G	T	T	PASS	0/0	0/0	0/0	0/0	0/0	0/0	0/0	0/0	0/0	0/0	0/1	0/0	11	1	416		TRUE
2	23733826	C	A	#N/A	#N/A	#N/A	#N/A	#N/A	#N/A	#N/A	#N/A	#N/A	#N/A	#N/A	#N/A	#N/A	#N/A	0	0	FALSE	TRUE	TRUE
2	24266100	C	A	A	PASS	0/0	0/0	0/0	0/0	0/0	0/0	0/0	0/0	0/0	0/0	0/1	0/0	11	1	417		TRUE
2	25128712	C	A	A	PASS	0/0	0/0	0/0	0/0	0/0	0/1	0/0	0/0	0/0	0/0	0/0	0/0	11	1	418		TRUE
2	25355085	C	T	T	PASS	0/0	0/0	0/0	0/0	0/0	0/0	0/0	0/0	0/0	0/0	0/1	0/0	11	1	419		TRUE
2	25593525	G	T	T	PASS	0/0	0/1	0/0	0/0	0/0	0/0	0/0	0/0	0/0	0/0	0/0	0/0	11	1	420		TRUE
2	26294958	G	C	C	PASS	0/0	0/1	0/0	0/0	0/0	0/0	0/0	0/0	0/0	0/0	0/0	0/0	11	1	421		TRUE
2	30731493	G	C	C	PASS	0/0	0/0	0/0	0/0	0/1	0/0	0/0	0/0	0/0	0/0	0/0	0/0	11	1	422		TRUE
2	30915897	T	A	A,*	PASS	0/2	0/2	0/0	0/0	0/2	0/2	0/2	0/0	0/0	0/2	0/2	0/1	4	0	FALSE	TRUE	TRUE
2	32852997	C	T	T	PASS	0/0	0/1	0/0	0/0	0/0	0/0	0/0	0/0	0/0	0/0	0/0	0/0	11	1	423		TRUE
2	33300044	C	A	A	PASS	0/1	0/0	0/0	0/0	0/0	0/0	0/0	0/0	0/0	0/0	0/0	0/0	11	1	424		TRUE
2	33810151	G	A	A	PASS	0/0	0/0	0/0	0/0	0/0	0/1	0/0	0/0	0/0	0/0	0/0	0/0	11	1	425		TRUE
2	33916270	C	T	T	PASS	0/0	0/0	0/0	0/0	0/1	0/0	0/0	0/0	0/0	0/0	0/0	0/0	11	1	426		TRUE
2	34489003	T	C	C	PASS	0/0	0/0	0/0	0/0	0/1	0/0	0/0	0/0	0/0	0/0	0/0	0/0	11	1	427		TRUE
2	35610395	G	A	A	PASS	0/1	0/0	0/0	0/0	0/0	0/0	0/0	0/0	0/0	0/0	0/0	0/0	11	1	428		TRUE
2	36371663	C	A	A	PASS	0/0	0/0	0/0	0/0	0/0	0/0	0/1	0/0	0/0	0/0	0/0	0/0	11	1	429		TRUE
2	36480027	C	T	T	PASS	0/0	0/0	0/0	0/0	0/1	0/0	0/0	0/0	0/0	0/0	0/0	0/0	11	1	430		TRUE
2	37211412	G	T	T	PASS	0/0	0/0	0/0	0/0	0/0	0/0	0/0	0/1	0/0	0/0	0/0	0/0	11	1	431		TRUE
2	37212391	T	A	A	PASS	0/1	0/0	0/0	0/0	0/0	0/0	0/0	0/0	0/0	0/0	0/0	0/0	11	1	432		TRUE
2	37299848	T	A	A	PASS	0/0	0/0	0/0	0/0	0/0	0/0	0/0	0/0	0/0	0/0	0/1	0/0	11	1	433		TRUE
2	37326017	G	A	A	PASS	0/0	0/0	0/1	0/0	0/0	0/0	0/0	0/0	0/0	0/0	0/0	0/0	11	1	434		TRUE
2	38014956	G	T	T	PASS	0/0	0/0	0/0	0/0	0/0	0/0	0/0	0/0	0/0	0/0	0/1	0/0	11	1	435		TRUE
2	38464050	C	A	A	PASS	0/1	0/0	0/0	0/0	0/0	0/0	0/0	0/0	0/0	0/0	0/0	0/0	11	1	436		TRUE
2	38685271	G	A	A	PASS	0/0	0/1	0/0	0/0	0/0	0/0	0/0	0/0	0/0	0/0	0/0	0/0	11	1	437		TRUE
2	39078563	G	T	T	PASS	0/0	0/0	0/0	0/0	0/1	0/0	0/0	0/0	0/0	0/0	0/0	0/0	11	1	438		TRUE
2	39566503	G	T	T	PASS	0/1	0/0	0/0	0/0	0/0	0/0	0/0	0/0	0/0	0/0	0/0	0/0	11	1	439		TRUE
2	39580930	C	T	T	PASS	0/0	0/0	0/0	0/0	0/0	0/0	0/0	0/0	0/0	0/0	0/1	0/0	11	1	440		TRUE
2	39594464	A	C	C	PASS	0/0	0/0	0/0	0/1	0/0	0/0	0/0	0/0	0/0	0/0	0/0	0/0	11	1	441		TRUE
2	40080226	G	A	A	PASS	0/0	0/0	0/1	0/0	0/0	0/0	0/0	0/0	0/0	0/0	0/0	0/0	11	1	442		TRUE
2	40096279	T	C	C	PASS	0/1	0/0	0/0	0/0	0/0	0/0	0/0	0/0	0/0	0/0	0/0	0/0	11	1	443		TRUE
2	40333683	C	G	G	PASS	0/1	0/0	0/0	0/0	0/0	0/0	0/0	0/0	0/0	0/0	0/0	0/0	11	1	444		TRUE
2	40980567	A	G	G	PASS	0/0	0/0	0/1	0/0	0/0	0/0	0/0	0/0	0/0	0/0	0/0	0/0	11	1	445		TRUE
2	41612358	G	A	A	PASS	0/0	0/0	0/0	0/0	0/1	0/0	0/0	0/0	0/0	0/0	0/0	0/0	11	1	446		TRUE
2	41926358	C	A	A	PASS	0/1	0/0	0/0	0/0	0/0	0/0	0/0	0/0	0/0	0/0	0/0	0/0	11	1	447		TRUE
2	41945218	G	T	T	PASS	0/0	0/0	0/1	0/0	0/0	0/0	0/0	0/0	0/0	0/0	0/0	0/0	11	1	448		TRUE
2	41997583	G	A	A	PASS	0/0	0/0	0/0	0/0	0/0	0/0	0/0	0/0	0/0	0/0	0/1	0/0	11	1	449		TRUE
2	42318819	G	C	C	PASS	0/0	0/0	0/0	0/0	0/0	0/0	0/0	0/1	0/0	0/0	0/0	0/0	11	1	450		TRUE
2	42381391	G	T	T	PASS	0/0	0/0	0/0	0/0	0/0	0/0	0/0	0/1	0/0	0/0	0/0	0/0	11	1	451		TRUE
2	42621833	A	G	G	PASS	0/0	0/0	0/0	0/0	0/0	0/0	0/0	0/0	0/1	0/0	0/0	0/0	11	1	452		TRUE
2	42715627	C	A	A	PASS	0/1	0/0	0/0	0/0	0/0	0/0	0/0	0/0	0/0	0/0	0/0	0/0	11	1	453		TRUE
2	43017428	C	A	A	PASS	0/1	0/0	0/0	0/0	0/0	0/0	0/0	0/0	0/0	0/0	0/0	0/0	11	1	454		TRUE
2	43108027	C	T	T	PASS	0/0	0/0	0/0	0/0	0/0	0/0	0/0	0/1	0/0	0/0	0/0	0/0	11	1	455		TRUE
2	43186908	G	A	A	PASS	0/0	0/0	0/0	0/0	0/1	0/0	0/0	0/0	0/0	0/0	0/0	0/0	11	1	456		TRUE
2	43247614	G	T	T	PASS	0/0	0/0	0/0	0/0	0/0	0/0	0/0	0/1	0/0	0/0	0/0	0/0	11	1	457		TRUE
2	43258603	T	C	C	PASS	0/1	0/0	0/0	0/0	0/0	0/0	0/0	0/0	0/0	0/0	0/0	0/0	11	1	458		TRUE
2	43562499	C	A	A	PASS	0/0	0/0	0/0	0/0	0/0	0/0	0/0	0/0	0/0	0/0	0/0	0/1	11	1	459		TRUE
2	43734034	C	T	T	PASS	0/0	0/0	0/0	0/0	0/1	0/0	0/0	0/0	0/0	0/0	0/0	0/0	11	1	460		TRUE
2	43948522	G	A	A	PASS	0/0	0/1	0/0	0/0	0/0	0/0	0/0	0/0	0/0	0/0	0/0	0/0	11	1	461		TRUE
2	43949335	C	T	T	PASS	0/1	0/0	0/0	0/0	0/0	0/0	0/0	0/0	0/0	0/0	0/0	0/0	11	1	462		TRUE
2	44560861	G	T	T	SNP_LowQualityDepth	0/0	0/0	0/0	0/0	0/0	0/0	0/0	0/0	0/0	0/0	0/0	0/1	11	1	FALSE	TRUE	TRUE
2	44795222	C	T	T	PASS	0/0	0/0	0/0	0/0	0/0	0/0	0/0	0/0	0/1	0/0	0/0	0/0	11	1	463		TRUE
2	44802442	C	A	A	PASS	0/0	0/1	0/0	0/0	0/0	0/0	0/0	0/0	0/0	0/0	0/0	0/0	11	1	464		TRUE
2	45048328	C	G	G	PASS	0/1	0/0	0/0	0/0	0/0	0/0	0/0	0/0	0/0	0/0	0/0	0/0	11	1	465		TRUE
2	45342401	T	A	A	PASS	0/0	0/0	0/1	0/0	0/0	0/0	0/0	0/0	0/0	0/0	0/0	0/0	11	1	466		TRUE
2	45591676	A	G	G	PASS	0/0	0/0	0/0	0/0	0/1	0/0	0/0	0/0	0/0	0/0	0/0	0/0	11	1	467		TRUE
2	45827405	A	T	T	PASS	0/1	0/0	0/0	0/0	0/0	0/0	0/0	0/0	0/0	0/0	0/0	0/0	11	1	468		TRUE
2	46176090	C	T	T	PASS	0/1	0/0	0/0	0/0	0/0	0/0	0/0	0/0	0/0	0/0	0/0	0/0	11	1	469		TRUE
2	46241988	C	A	A	PASS	0/0	0/0	0/0	0/0	0/1	0/0	0/0	0/0	0/0	0/0	0/0	0/0	11	1	470		TRUE
2	46443715	A	T	T	PASS	0/0	0/0	0/1	0/0	0/0	0/0	0/0	0/0	0/0	0/0	0/0	0/0	11	1	471		TRUE
2	46857638	C	A	A	PASS	0/0	0/0	0/1	0/0	0/0	./.	./.	0/0	0/0	0/0	0/0	0/0	9	1	FALSE	TRUE	TRUE
2	47933597	G	T	T	PASS	0/0	0/0	0/0	0/0	0/0	0/0	0/0	0/0	0/0	0/0	0/0	0/1	11	1	472		TRUE
2	48213371	A	C	C	PASS	0/0	0/0	0/0	0/0	0/0	0/1	0/0	0/0	0/0	0/0	0/0	0/0	11	1	473		TRUE
2	48955924	T	G	G	PASS	0/0	0/0	0/1	0/0	0/0	0/0	0/0	0/0	0/0	0/0	0/0	0/0	11	1	474		TRUE
2	49014386	C	A	A	PASS	0/0	0/0	0/0	0/0	0/1	0/0	0/0	0/0	0/0	0/0	0/0	0/0	11	1	475		TRUE
2	50182351	G	A	A	PASS	0/0	0/0	0/0	0/0	0/0	0/0	0/0	0/0	0/0	0/0	0/0	0/1	11	1	476		TRUE
2	50388399	G	A	A	PASS	0/0	0/0	0/1	0/0	0/0	0/0	0/0	0/0	0/0	0/0	0/0	0/0	11	1	477		TRUE
2	51185435	G	T	T	PASS	0/0	0/0	0/0	0/0	0/0	0/0	0/0	0/0	0/0	0/0	0/0	0/1	11	1	478		TRUE
2	52244595	G	T	T	PASS	0/0	0/0	0/1	0/0	0/0	0/0	0/0	0/0	0/0	0/0	0/0	0/0	11	1	479		TRUE
2	52940823	T	A	A	PASS	0/0	0/0	0/1	0/0	0/0	0/0	0/0	0/0	0/0	0/0	0/0	0/0	11	1	480		TRUE
2	54078109	A	G	G	PASS	0/0	0/0	0/0	0/0	0/0	0/0	0/0	0/0	0/0	0/0	0/1	0/0	11	1	481		TRUE
2	54187238	A	T	T	PASS	0/0	0/0	0/0	0/0	0/0	0/0	0/0	0/1	0/0	0/0	0/0	0/0	11	1	482		TRUE
2	54244172	C	A	A	PASS	0/0	0/0	0/0	0/0	0/1	0/0	0/0	0/0	0/0	0/0	0/0	0/0	11	1	483		TRUE
2	54244173	C	T	T	PASS	0/0	0/0	0/0	0/0	0/1	0/0	0/0	0/0	0/0	0/0	0/0	0/0	11	1	484		TRUE
2	54366677	G	T	T	PASS	0/0	0/0	0/0	0/0	0/0	0/0	0/1	0/0	0/0	0/0	0/0	0/0	11	1	485		TRUE
2	54807965	G	T	T	PASS	0/0	0/0	0/0	0/0	0/1	0/0	0/0	0/0	0/0	0/0	0/0	0/0	11	1	486		TRUE
2	55172438	T	A	A	PASS	0/0	0/0	0/0	0/1	0/0	0/0	0/0	0/0	0/0	0/0	0/0	0/0	11	1	487		TRUE
2	55224745	C	A	A	PASS	0/0	0/0	0/1	0/0	0/0	0/0	0/0	0/0	0/0	0/0	0/0	0/0	11	1	488		TRUE
2	55571782	G	C	C	PASS	0/0	0/0	0/0	0/0	0/0	0/0	0/0	0/1	0/0	0/0	0/0	0/0	11	1	489		TRUE
2	55856828	A	C	C	PASS	0/1	0/0	0/0	0/0	0/0	0/0	0/0	0/0	0/0	0/0	0/0	0/0	11	1	490		TRUE
2	56362716	C	A	A	PASS	0/1	0/0	0/0	0/0	0/0	0/0	0/0	0/0	0/0	0/0	0/0	0/0	11	1	491		TRUE
2	56402926	G	A	A	PASS	0/0	0/0	0/0	0/0	0/0	0/0	0/0	0/1	0/0	0/0	0/0	0/0	11	1	492		TRUE
2	56975791	G	T	T	PASS	0/0	0/0	0/0	0/0	0/0	0/0	0/0	0/1	0/0	0/0	0/0	0/0	11	1	493		TRUE
2	57830671	G	C	C	PASS	0/0	0/0	0/1	0/0	0/0	0/0	0/0	0/0	0/0	0/0	0/0	0/0	11	1	494		TRUE
2	58607767	G	A	A	PASS	0/0	0/0	0/0	0/0	0/0	0/1	0/0	0/0	0/0	0/0	0/0	0/0	11	1	495		TRUE
2	60801659	G	T	T	PASS	0/0	0/0	0/0	0/0	0/0	0/0	0/0	0/1	0/0	0/0	0/0	0/0	11	1	496		TRUE
2	62147170	G	T	T	PASS	0/0	0/0	0/0	0/0	0/1	0/0	0/0	0/0	0/0	0/0	0/0	0/0	11	1	497		TRUE
2	63032108	C	A	A	PASS	0/0	0/0	0/0	0/0	0/0	0/1	0/0	0/0	0/0	0/0	0/0	0/0	11	1	498		TRUE
2	63173999	G	T	T	PASS	0/0	0/0	0/0	0/0	0/1	0/0	0/0	0/0	0/0	0/0	0/0	0/0	11	1	499		TRUE
2	64189472	C	A	A	SNP_LowQualityDepth	0/0	0/1	0/0	0/0	0/0	0/0	0/0	0/0	0/0	0/0	0/0	0/0	11	1	FALSE	TRUE	TRUE
2	65735203	G	T	T	PASS	0/0	0/0	0/0	0/0	0/1	0/0	0/0	0/0	0/0	0/0	0/0	0/0	11	1	500		TRUE
2	66306123	G	A	A	PASS	0/0	0/0	0/0	0/0	0/0	0/1	0/0	0/0	0/0	0/0	0/0	0/0	11	1	501		TRUE
2	66685430	A	T	T	PASS	0/0	0/0	0/0	0/0	0/0	0/0	0/0	0/0	0/1	0/0	0/0	0/0	11	1	502		TRUE
2	66804280	C	A	A	SNP_LowQualityDepth	0/0	0/0	0/0	0/0	0/0	0/0	0/0	0/0	0/0	0/0	0/0	0/1	11	1	FALSE	TRUE	TRUE
2	66860016	A	G	G	SNP_LowQualityDepth	0/0	0/1	0/0	0/0	0/0	0/0	0/0	0/0	0/0	0/0	0/0	0/0	11	1	FALSE	TRUE	TRUE
2	67112258	G	T	T	PASS	0/1	0/0	0/0	0/0	0/0	0/0	0/0	0/0	0/0	0/0	0/0	0/0	11	1	503		TRUE
2	67182898	G	T	T	PASS	0/0	0/0	0/0	0/0	0/0	0/1	0/0	0/0	0/0	0/0	0/0	0/0	11	1	504		TRUE
2	67460219	C	A	A	PASS	0/0	0/0	0/0	0/0	0/0	0/0	0/0	0/0	0/1	0/0	0/0	0/0	11	1	505		TRUE
2	67476931	C	T	T	PASS	0/0	0/0	0/0	0/0	0/0	0/0	0/0	0/1	0/0	0/0	0/0	0/0	11	1	506		TRUE
2	67481860	C	T	T	PASS	0/1	0/0	0/0	0/0	0/0	0/0	0/0	0/0	0/0	0/0	0/0	0/0	11	1	507		TRUE
2	67916323	G	T	T	PASS	0/0	0/0	0/0	0/0	0/0	0/0	0/0	0/1	0/0	0/0	0/0	0/0	11	1	508		TRUE
2	69254636	C	T	T	PASS	0/0	0/0	0/0	0/0	0/0	0/0	0/0	0/1	0/0	0/0	0/0	0/0	11	1	509		TRUE
2	69256277	C	A	A	PASS	0/1	0/0	0/0	0/0	0/0	0/0	0/0	0/0	0/0	0/0	0/0	0/0	11	1	510		TRUE
2	69854054	A	T	T	PASS	0/0	0/0	0/1	0/0	0/0	0/0	0/0	0/0	0/0	0/0	0/0	0/0	11	1	511		TRUE
2	70321936	C	A	A	PASS	0/1	0/0	0/0	0/0	0/0	0/0	0/0	0/0	0/0	0/0	0/0	0/0	11	1	512		TRUE
2	72462300	C	A	A	PASS	0/0	0/0	0/0	0/0	0/0	0/0	0/0	0/1	0/0	0/0	0/0	0/0	11	1	513		TRUE
2	72495272	T	A	A	PASS	0/0	0/0	0/0	0/0	0/0	0/0	0/0	0/1	0/0	0/0	0/0	0/0	11	1	514		TRUE
2	73531776	C	A	A	PASS	0/0	0/0	0/0	0/0	0/0	0/1	0/0	0/0	0/0	0/0	0/0	0/0	11	1	515		TRUE
2	73794852	G	A	A	PASS	0/1	0/0	0/0	0/0	0/0	0/0	0/0	0/0	0/0	0/0	0/0	0/0	11	1	516		TRUE
2	75548140	G	T	T	PASS	0/0	0/0	0/0	0/0	0/0	0/0	0/0	0/1	0/0	0/0	0/0	0/0	11	1	517		TRUE
2	75869242	G	A	A	PASS	0/1	0/0	0/0	0/0	0/0	0/0	0/0	0/0	0/0	0/0	0/0	0/0	11	1	518		TRUE
2	75869243	G	A	A	PASS	0/1	0/0	0/0	0/0	0/0	0/0	0/0	0/0	0/0	0/0	0/0	0/0	11	1	519		TRUE
2	78603925	C	A	A	PASS	0/0	0/0	0/0	0/0	0/0	0/1	0/0	0/0	0/0	0/0	0/0	0/0	11	1	520		TRUE
2	79833818	C	A	A	PASS	0/0	0/1	0/0	0/0	0/0	0/0	0/0	0/0	0/0	0/0	0/0	0/0	11	1	521		TRUE
2	81082185	A	G	G	PASS	0/0	0/0	0/0	0/0	0/1	0/0	0/0	0/0	0/0	0/0	0/0	0/0	11	1	522		TRUE
2	81251523	C	G	G	PASS	0/0	0/0	0/0	0/0	0/1	0/0	0/0	0/0	0/0	0/0	0/0	0/0	11	1	523		TRUE
2	81603404	C	A	A	PASS	0/0	0/0	0/1	0/0	0/0	0/0	0/0	0/0	0/0	0/0	0/0	0/0	11	1	524		TRUE
2	81989530	G	A	A	PASS	0/0	0/0	0/0	0/1	0/0	0/0	0/0	0/0	0/0	0/0	0/0	0/0	11	1	525		TRUE
2	82532935	C	T	T	PASS	0/0	0/0	0/0	0/0	0/1	0/0	0/0	0/0	0/0	0/0	0/0	0/0	11	1	526		TRUE
2	82800932	C	T	T	PASS	0/0	0/0	0/0	0/0	0/0	0/0	0/0	0/1	0/0	0/0	0/0	0/0	11	1	527		TRUE
2	82985773	C	A	A	PASS	0/0	0/1	0/0	0/0	0/0	0/0	0/0	0/0	0/0	0/0	0/0	0/0	11	1	528		TRUE
2	83360287	T	G	G	PASS	0/0	0/0	0/0	0/0	0/0	0/0	0/0	0/0	0/0	0/0	0/1	0/0	11	1	529		TRUE
2	83370615	G	T	T,*	SNP_LowQualityDepth	0/0	0/0	0/2	0/2	0/2	0/2	0/1	0/2	0/2	0/2	0/2	0/0	3	0	FALSE	?	FALSE
2	83547339	C	T	#N/A	#N/A	#N/A	#N/A	#N/A	#N/A	#N/A	#N/A	#N/A	#N/A	#N/A	#N/A	#N/A	#N/A	0	0	FALSE	FALSE	FALSE
2	84043531	T	G	G	PASS	0/0	0/0	0/0	0/1	0/0	0/0	0/0	0/0	0/0	0/0	0/0	0/0	11	1	530		TRUE
2	84100942	T	G	G	PASS	0/0	0/0	0/0	0/0	0/0	0/0	0/1	0/0	0/0	0/0	0/0	0/0	11	1	531		TRUE
2	85957187	G	A	A	PASS	0/0	0/1	0/0	0/0	0/0	0/0	0/0	0/0	0/0	0/0	0/0	0/0	11	1	532		TRUE
2	86249441	G	T	T	PASS	0/0	0/0	0/0	0/0	0/1	0/0	0/0	0/0	0/0	0/0	0/0	0/0	11	1	533		TRUE
2	86355810	C	A	A	PASS	0/1	0/0	0/0	0/0	0/0	0/0	0/0	0/0	0/0	0/0	0/0	0/0	11	1	534		TRUE
2	86558494	T	A	A	PASS	0/0	0/1	0/0	0/0	0/0	0/0	0/0	0/0	0/0	0/0	0/0	0/0	11	1	535		TRUE
2	86753289	C	A	A	PASS	0/0	0/0	0/1	0/0	0/0	0/0	0/0	0/0	0/0	0/0	0/0	0/0	11	1	536		TRUE
2	86919790	G	A	A	PASS	0/0	0/0	0/0	0/0	0/0	0/1	0/0	0/0	0/0	0/0	0/0	0/0	11	1	537		TRUE
2	86957488	A	T	T	PASS	0/0	0/0	0/1	0/0	0/0	0/0	0/0	0/0	0/0	0/0	0/0	0/0	11	1	538		TRUE
2	87417353	T	A	A	PASS	0/1	0/0	0/0	0/0	0/0	0/0	0/0	0/0	0/0	0/0	0/0	0/0	11	1	539		TRUE
2	87762719	C	A	A	PASS	0/0	0/0	0/1	0/0	0/0	0/0	0/0	0/0	0/0	0/0	0/0	0/0	11	1	540		TRUE
2	87789471	A	T	T	PASS	0/0	0/0	0/1	0/0	0/0	0/0	0/0	0/0	0/0	0/0	0/0	0/0	11	1	541		TRUE
2	88404411	A	C	C	PASS	0/0	0/0	0/0	0/1	0/0	0/0	0/0	0/0	0/0	0/0	0/0	0/0	11	1	542		TRUE
2	88441007	G	T	T	PASS	0/0	0/0	0/1	0/0	0/0	0/0	0/0	0/0	0/0	0/0	0/0	0/0	11	1	543		TRUE
2	88921743	C	T	T	PASS	0/0	0/0	0/0	0/0	0/0	0/0	0/0	0/0	0/1	0/0	0/0	0/0	11	1	544		TRUE
2	89278241	C	A	A	PASS	0/0	0/0	0/0	0/0	0/0	0/1	0/0	0/0	0/0	0/0	0/0	0/0	11	1	545		TRUE
2	89596835	C	T	T	PASS	0/0	0/0	0/1	0/0	0/0	0/0	0/0	0/0	0/0	0/0	0/0	0/0	11	1	546		TRUE
2	89797147	G	T	T	PASS	0/0	0/0	0/0	0/0	0/0	0/0	0/0	0/1	0/0	0/0	0/0	0/0	11	1	547		TRUE
2	90009583	C	A	A	PASS	0/0	0/0	0/0	0/0	0/0	0/0	0/1	0/0	0/0	0/0	0/0	0/0	11	1	548		TRUE
2	91368990	C	A	A	PASS	0/0	0/0	0/0	0/0	0/0	0/0	0/0	0/0	0/0	0/0	0/0	0/1	11	1	549		TRUE
2	92681320	A	C	#N/A	#N/A	#N/A	#N/A	#N/A	#N/A	#N/A	#N/A	#N/A	#N/A	#N/A	#N/A	#N/A	#N/A	0	0	FALSE	FALSE	FALSE
2	93174963	C	A	A	PASS	0/1	0/0	0/0	0/0	0/0	0/0	0/0	0/0	0/0	0/0	0/0	0/0	11	1	550		TRUE
2	93434344	T	C	C	PASS	0/0	0/1	0/0	0/0	0/0	0/0	0/0	0/0	0/0	0/0	0/0	0/0	11	1	551		TRUE
2	94128164	C	A	A	SNP_LowQualityDepth	0/0	0/0	0/0	0/0	0/0	0/0	0/0	0/0	0/0	0/0	0/0	0/1	11	1	FALSE	TRUE	TRUE
2	94269374	C	T	T	PASS	0/0	0/1	0/0	0/0	0/0	0/0	0/0	0/0	0/0	0/0	0/0	0/0	11	1	552		TRUE
2	95806335	T	A	A	PASS	0/0	0/0	0/0	0/0	0/1	0/0	0/0	0/0	0/0	0/0	0/0	0/0	11	1	553		TRUE
2	96348242	C	T	T	PASS	0/0	0/0	0/1	0/0	0/0	0/0	0/0	0/0	0/0	0/0	0/0	0/0	11	1	554		TRUE
2	96448827	C	A	A	PASS	0/0	0/0	0/0	0/1	0/0	0/0	0/0	0/0	0/0	0/0	0/0	0/0	11	1	555		TRUE
2	96567723	A	G	G	PASS	0/1	0/0	0/0	0/0	0/0	0/0	0/0	0/0	0/0	0/0	0/0	0/0	11	1	556		TRUE
2	96568954	G	C	C	SNP_LowQualityDepth	0/0	0/0	0/0	0/0	0/0	0/0	0/0	0/0	0/0	0/0	0/1	0/0	11	1	FALSE	TRUE	TRUE
2	96868855	C	A	A	PASS	0/0	0/0	0/0	0/1	0/0	0/0	0/0	0/0	0/0	0/0	0/0	0/0	11	1	557		TRUE
2	97077344	C	T	T	PASS	0/0	0/0	0/1	0/0	0/0	0/0	0/0	0/0	0/0	0/0	0/0	0/0	11	1	558		TRUE
2	97120506	A	G	G	PASS	0/0	0/0	0/0	0/0	0/0	0/0	0/0	0/0	0/0	0/0	0/0	0/1	11	1	559		TRUE
2	97131783	G	T	T	PASS	0/0	0/1	0/0	0/0	0/0	0/0	0/0	0/0	0/0	0/0	0/0	0/0	11	1	560		TRUE
2	97138629	C	T	T	PASS	0/0	0/0	0/0	0/0	0/0	0/0	0/0	0/0	0/0	0/0	0/0	0/1	11	1	561		TRUE
2	97264519	G	T	T	PASS	0/1	0/0	0/0	0/0	0/0	0/0	0/0	0/0	0/0	0/0	0/0	0/0	11	1	562		TRUE
2	97467973	G	T	T	PASS	0/1	0/0	0/0	0/0	0/0	0/0	0/0	0/0	0/0	0/0	0/0	0/0	11	1	563		TRUE
2	97605553	G	C	C	PASS	0/1	0/0	0/0	0/0	0/0	0/0	0/0	0/0	0/0	0/0	0/0	0/0	11	1	564		TRUE
2	97605554	C	T	T	PASS	0/1	0/0	0/0	0/0	0/0	0/0	0/0	0/0	0/0	0/0	0/0	0/0	11	1	565		TRUE
2	97908923	G	A	A	PASS	0/0	0/0	0/1	0/0	0/0	0/0	0/0	0/0	0/0	0/0	0/0	0/0	11	1	566		TRUE
2	97955657	A	C	C	PASS	0/0	0/0	0/0	0/0	0/0	0/0	0/0	0/0	0/1	0/0	0/0	0/0	11	1	567		TRUE
2	97964598	C	G	G	PASS	0/0	0/0	0/1	0/0	0/0	0/0	0/0	0/0	0/0	0/0	0/0	0/0	11	1	568		TRUE
2	98050335	T	C	C	SNP_LowQualityDepth	0/0	0/0	0/0	0/0	0/0	0/0	0/0	0/0	0/0	0/0	0/0	0/1	11	1	FALSE	TRUE	TRUE
2	98053235	G	T	T	PASS	0/0	0/0	0/1	0/0	0/0	0/0	0/0	0/0	0/0	0/0	0/0	0/0	11	1	569		TRUE
2	98357464	A	T	T	PASS	0/0	0/0	0/1	0/0	0/0	0/0	0/0	0/0	0/0	0/0	0/0	0/0	11	1	570		TRUE
2	98374809	C	G	G	PASS	0/0	0/0	0/0	0/0	0/0	0/0	0/0	0/0	0/0	0/0	0/1	0/0	11	1	571		TRUE
2	99060898	A	T	T	PASS	0/0	0/0	0/0	0/0	0/0	0/0	0/0	0/0	0/0	0/0	0/1	0/0	11	1	572		TRUE
2	99194214	G	T	T	PASS	0/0	0/0	0/1	0/0	0/0	0/0	0/0	0/0	0/0	0/0	0/0	0/0	11	1	573		TRUE
2	99407717	T	G	G	PASS	0/0	0/0	0/0	0/0	0/0	0/1	0/0	0/0	0/0	0/0	0/0	0/0	11	1	574		TRUE
2	99489905	T	C	C	PASS	0/1	0/0	0/0	0/0	0/0	0/0	0/0	0/0	0/0	0/0	0/0	0/0	11	1	575		TRUE
2	99572758	G	C	C	PASS	0/0	0/0	0/0	0/0	0/0	0/1	0/0	0/0	0/0	0/0	0/0	0/0	11	1	576		TRUE
2	99722549	G	A	A	PASS	0/0	0/0	0/0	0/0	0/0	0/0	0/0	0/0	0/0	0/0	0/0	0/1	11	1	577		TRUE
2	99789276	C	A	A	PASS	0/0	0/0	0/0	0/0	0/0	0/0	0/0	0/0	0/1	0/0	0/0	0/0	11	1	578		TRUE
2	99886890	T	G	G	PASS	0/0	0/0	0/0	0/0	0/0	0/0	0/0	0/0	0/1	0/0	0/0	0/0	11	1	579		TRUE
2	99912409	C	A	A	PASS	0/0	0/0	0/0	0/1	0/0	0/0	0/0	0/0	0/0	0/0	0/0	0/0	11	1	580		TRUE
2	101812814	A	T	T	PASS	0/0	0/0	0/0	0/0	0/1	0/0	0/0	0/0	0/0	0/0	0/0	0/0	11	1	581		TRUE
2	101888423	C	T	T	PASS	0/0	0/0	0/0	0/0	0/0	0/0	0/1	0/0	0/0	0/0	0/0	0/0	11	1	582		TRUE
2	101888452	C	T	T	PASS	0/0	0/0	0/0	0/0	0/0	0/0	0/1	0/0	0/0	0/0	0/0	0/0	11	1	583		TRUE
2	103024317	G	T	T	PASS	0/1	0/0	0/0	0/0	0/0	0/0	0/0	0/0	0/0	0/0	0/0	0/0	11	1	584		TRUE
2	105130304	C	T	T	PASS	0/0	0/1	0/0	0/0	0/0	0/0	0/0	0/0	0/0	0/0	0/0	0/0	11	1	585		TRUE
2	105402450	T	C	C	PASS	0/0	0/0	0/1	0/0	0/0	0/0	0/0	0/0	0/0	0/0	0/0	0/0	11	1	586		TRUE
2	105451286	G	T	T	PASS	0/1	0/0	0/0	0/0	0/0	0/0	0/0	0/0	0/0	0/0	0/0	0/0	11	1	587		TRUE
2	105619434	G	A	A	PASS	0/0	0/0	0/0	0/0	0/0	0/0	0/0	0/0	0/0	0/0	0/1	0/0	11	1	588		TRUE
2	105691317	T	C	C	PASS	0/0	0/0	0/0	0/0	0/0	0/0	0/0	0/1	0/0	0/0	0/0	0/0	11	1	589		TRUE
2	106521913	A	G	#N/A	#N/A	#N/A	#N/A	#N/A	#N/A	#N/A	#N/A	#N/A	#N/A	#N/A	#N/A	#N/A	#N/A	0	0	FALSE	?	FALSE
2	106625293	C	T	T	PASS	0/0	0/0	0/0	0/0	0/0	0/0	0/0	0/0	0/1	0/0	0/0	0/0	11	1	590		TRUE
2	106632907	A	C	C	PASS	0/0	0/0	0/0	0/0	0/0	0/0	0/0	0/0	0/1	0/0	0/0	0/0	11	1	591		TRUE
2	107181040	G	A	A	PASS	0/0	0/0	0/0	0/0	0/1	0/0	0/0	0/0	0/0	0/0	0/0	0/0	11	1	592		TRUE
2	107199291	G	T	T	SNP_LowQualityDepth	0/0	0/0	0/0	0/0	0/0	0/0	0/0	0/0	0/0	0/0	0/0	0/1	11	1	FALSE	TRUE	TRUE
2	107406952	G	T	T	PASS	0/0	0/0	0/0	0/0	0/1	0/0	0/0	0/0	0/0	0/0	0/0	0/0	11	1	593		TRUE
2	107858690	C	T	T	PASS	0/0	0/0	0/0	0/0	0/0	0/0	0/0	0/0	0/0	0/0	0/1	0/0	11	1	594		TRUE
2	107916547	G	T	T	SNP_MappingQuality	0/0	0/1	0/0	0/0	0/0	0/0	0/0	0/0	0/0	0/0	0/0	0/0	11	1	FALSE	TRUE	TRUE
2	108273896	C	T	T	PASS	0/1	0/0	0/0	0/0	0/0	0/0	0/0	0/0	0/0	0/0	0/0	0/0	11	1	595		TRUE
2	108481885	G	A	A	PASS	0/0	0/1	0/0	0/0	0/0	0/0	0/0	0/0	0/0	0/0	0/0	0/0	11	1	596		TRUE
2	110849282	A	C	#N/A	#N/A	#N/A	#N/A	#N/A	#N/A	#N/A	#N/A	#N/A	#N/A	#N/A	#N/A	#N/A	#N/A	0	0	FALSE	FALSE	FALSE
2	111525521	G	C	C	PASS	0/0	0/0	0/0	0/0	0/1	0/0	0/0	0/0	0/0	0/0	0/0	0/0	11	1	597		TRUE
2	111545015	T	A	A	PASS	0/0	0/0	0/1	0/0	0/0	0/0	0/0	0/0	0/0	0/0	0/0	0/0	11	1	598		TRUE
2	111586497	G	A	A	PASS	0/0	0/0	0/1	0/0	0/0	0/0	0/0	0/0	0/0	0/0	0/0	0/0	11	1	599		TRUE
2	111615141	T	G	G	PASS	0/0	0/0	0/0	0/0	0/0	0/0	0/1	0/0	0/0	0/0	0/0	0/0	11	1	600		TRUE
2	114746830	A	G	G	PASS	0/0	0/0	0/0	0/0	0/0	0/0	0/0	0/0	0/1	0/0	0/0	0/0	11	1	601		TRUE
2	116279900	G	A	A	PASS	0/0	0/0	0/0	0/0	0/0	0/0	0/1	0/0	0/0	0/0	0/0	0/0	11	1	602		TRUE
2	116364551	C	A	A	PASS	0/1	0/0	0/0	0/0	0/0	0/0	0/0	0/0	0/0	0/0	0/0	0/0	11	1	603		TRUE
2	116370504	G	A	A	PASS	0/0	0/0	0/0	0/0	0/0	0/0	0/0	0/1	0/0	0/0	0/0	0/0	11	1	604		TRUE
2	116528648	C	A	A	PASS	0/0	0/1	0/0	0/0	0/0	0/0	0/0	0/0	0/0	0/0	0/0	0/0	11	1	605		TRUE
2	117630350	G	T	T	PASS	0/0	0/0	0/0	0/0	0/0	0/0	0/1	0/0	0/0	0/0	0/0	0/0	11	1	606		TRUE
2	118001843	G	T	T	PASS	0/0	0/0	0/0	0/0	0/0	0/0	0/0	0/0	0/1	0/0	0/0	0/0	11	1	607		TRUE
2	118694640	G	A	A	PASS	0/0	0/0	0/0	0/0	0/0	0/0	0/0	0/0	0/0	0/0	0/1	0/0	11	1	608		TRUE
2	119787216	C	T	T	PASS	0/0	0/0	0/0	0/0	0/0	0/0	0/0	0/0	0/1	0/0	0/0	0/0	11	1	609		TRUE
2	123045914	G	T	T	PASS	0/0	0/0	0/0	0/0	0/0	0/0	0/0	0/0	0/1	0/0	0/0	0/0	11	1	610		TRUE
2	123394737	G	C	C	PASS	0/0	0/0	0/1	0/0	0/0	0/0	0/0	0/0	0/0	0/0	0/0	0/0	11	1	611		TRUE
2	124057310	C	A	A	PASS	0/0	0/0	0/0	0/1	0/0	0/0	0/0	0/0	0/0	0/0	0/0	0/0	11	1	612		TRUE
2	125921426	C	A	A	PASS	0/0	0/0	0/1	0/0	0/0	0/0	0/0	0/0	0/0	0/0	0/0	0/0	11	1	613		TRUE
2	126256144	C	T	T	PASS	0/0	0/0	0/0	0/0	0/0	0/0	0/0	0/0	0/0	0/0	0/1	0/0	11	1	614		TRUE
2	131679779	G	C	C	PASS	0/0	0/0	0/1	0/0	0/0	0/0	0/0	0/0	0/0	0/0	0/0	0/0	11	1	615		TRUE
2	132979404	G	C	C	PASS	0/0	0/0	0/0	0/0	0/0	0/0	0/0	0/0	0/1	0/0	0/0	0/0	11	1	616		TRUE
2	133781370	C	A	A	PASS	0/0	0/0	0/0	0/0	0/0	0/1	0/0	0/0	0/0	0/0	0/0	0/0	11	1	617		TRUE
2	133898291	A	C	C	PASS	0/1	0/0	0/0	0/0	0/0	0/0	0/0	0/0	0/0	0/0	0/0	0/0	11	1	618		TRUE
2	136329154	A	C	C	PASS	0/0	0/0	0/0	0/0	0/0	0/0	0/1	0/0	0/0	0/0	0/0	0/0	11	1	619		TRUE
2	136959308	C	G	G	PASS	0/0	0/0	0/0	0/0	0/0	0/0	0/0	0/0	0/0	0/0	0/0	0/1	11	1	620		TRUE
2	138016391	T	C	C	PASS	0/0	0/0	0/0	0/0	0/0	0/0	0/0	0/1	0/0	0/0	0/0	0/0	11	1	621		TRUE
2	138439639	T	A	A	PASS	0/1	0/0	0/0	0/0	0/0	0/0	0/0	0/0	0/0	0/0	0/0	0/0	11	1	622		TRUE
2	139163383	A	T	T	PASS	0/0	0/0	0/1	0/0	0/0	0/0	0/0	0/0	0/0	0/0	0/0	0/0	11	1	623		TRUE
2	139615414	A	C	C	PASS	0/0	0/0	0/0	0/1	0/0	0/0	0/0	0/0	0/0	0/0	0/0	0/0	11	1	624		TRUE
2	141291493	T	G	G	PASS	0/0	0/0	0/0	0/0	0/0	0/0	0/0	0/0	0/1	0/0	0/0	0/0	11	1	625		TRUE
2	141386940	G	T	T	PASS	0/1	0/0	0/0	0/0	0/0	0/0	0/0	0/0	0/0	0/0	0/0	0/0	11	1	626		TRUE
2	141975511	C	T	T	PASS	0/0	0/0	0/0	0/1	0/0	0/0	0/0	0/0	0/0	0/0	0/0	0/0	11	1	627		TRUE
2	143196876	T	C	C	PASS	0/1	0/0	0/0	0/0	0/0	0/0	0/0	0/0	0/0	0/0	0/0	0/0	11	1	628		TRUE
2	143783197	G	T	T	PASS	0/0	0/0	0/0	0/0	0/0	0/1	0/0	0/0	0/0	0/0	0/0	0/0	11	1	629		TRUE
2	144095843	C	A	A	PASS	0/1	0/0	0/0	0/0	0/0	0/0	0/0	0/0	0/0	0/0	0/0	0/0	11	1	630		TRUE
2	146761035	G	T	T	PASS	0/0	0/0	0/0	0/0	0/0	0/0	0/0	0/1	0/0	0/0	0/0	0/0	11	1	631		TRUE
2	148500992	C	T	T	PASS	0/0	0/0	0/0	0/0	0/0	0/1	0/0	0/0	0/0	0/0	0/0	0/0	11	1	632		TRUE
2	149374301	A	C	C	PASS	0/0	0/0	0/0	0/0	0/1	0/0	0/0	0/0	0/0	0/0	0/0	0/0	11	1	633		TRUE
2	149876524	C	A	A	PASS	0/0	0/0	0/0	0/1	0/0	0/0	0/0	0/0	0/0	0/0	0/0	0/0	11	1	634		TRUE
2	151356385	C	A	A	PASS	0/0	0/0	0/1	0/0	0/0	0/0	0/0	0/0	0/0	0/0	0/0	0/0	11	1	635		TRUE
2	151610833	G	T	T	PASS	0/1	0/0	0/0	0/0	0/0	0/0	0/0	0/0	0/0	0/0	0/0	0/0	11	1	636		TRUE
2	151610834	G	T	T	PASS	0/1	0/0	0/0	0/0	0/0	0/0	0/0	0/0	0/0	0/0	0/0	0/0	11	1	637		TRUE
2	152491644	C	A	A	PASS	0/0	0/1	0/0	0/0	0/0	0/0	0/0	0/0	0/0	0/0	0/0	0/0	11	1	638		TRUE
2	155315821	C	T	T	PASS	0/0	0/1	0/1	0/0	0/0	0/1	0/0	0/1	0/1	0/0	0/0	0/1	6	1	FALSE	TRUE	TRUE
2	155843149	G	T	T	PASS	0/0	0/0	0/1	0/0	0/0	0/0	0/0	0/0	0/0	0/0	0/0	0/0	11	1	639		TRUE
2	156872344	C	T	T	PASS	0/1	0/0	0/0	0/0	0/0	0/0	0/0	0/0	0/0	0/0	0/0	0/0	11	1	640		TRUE
2	157722087	C	A	A	PASS	0/0	0/0	0/1	0/0	0/0	0/0	0/0	0/0	0/0	0/0	0/0	0/0	11	1	641		TRUE
2	157783666	G	A	A	PASS	0/0	0/0	0/0	0/0	0/0	0/0	0/0	0/1	0/0	0/0	0/0	0/0	11	1	642		TRUE
2	158691765	G	T	T	SNP_LowQualityDepth	0/0	0/0	0/0	0/0	0/0	0/0	0/0	0/0	0/0	0/0	0/0	0/1	11	1	FALSE	TRUE	TRUE
2	159810852	G	C	C	PASS	0/0	0/0	0/1	0/0	0/0	0/0	0/0	0/0	0/0	0/0	0/0	0/0	11	1	643		TRUE
2	159932180	G	T	T	PASS	0/0	0/0	0/0	0/0	0/1	0/0	0/0	0/0	0/0	0/0	0/0	0/0	11	1	644		TRUE
2	160797013	A	G	G	PASS	0/0	0/0	0/0	0/0	0/1	0/0	0/0	0/0	0/0	0/0	0/0	0/0	11	1	645		TRUE
2	162748659	G	T	T	PASS	0/0	0/0	0/0	0/0	0/0	0/0	0/1	0/0	0/0	0/0	0/0	0/0	11	1	646		TRUE
2	164294236	C	A	A	PASS	0/1	0/0	0/0	0/0	0/0	0/0	0/0	0/0	0/0	0/0	0/0	0/0	11	1	647		TRUE
2	165066984	G	T	T	PASS	0/0	0/0	0/0	0/0	0/0	0/0	0/0	0/0	0/0	0/0	0/0	0/1	11	1	648		TRUE
2	165144793	C	T	T	PASS	0/0	0/0	0/0	0/1	0/0	0/0	0/0	0/0	0/0	0/0	0/0	0/0	11	1	649		TRUE
2	166597628	G	T	T	PASS	0/1	0/0	0/0	0/0	0/0	0/0	0/0	0/0	0/0	0/0	0/0	0/0	11	1	650		TRUE
2	166923458	G	A	A	PASS	0/0	0/0	0/1	0/0	0/0	0/0	0/0	0/0	0/0	0/0	0/0	0/0	11	1	651		TRUE
2	167270092	G	T	T	PASS	0/0	0/0	0/0	0/0	0/1	0/0	0/0	0/0	0/0	0/0	0/0	0/0	11	1	652		TRUE
2	169385307	T	A	A	PASS	0/0	0/0	0/0	0/0	0/0	0/0	0/1	0/0	0/0	0/0	0/0	0/0	11	1	653		TRUE
2	169875162	T	A	#N/A	#N/A	#N/A	#N/A	#N/A	#N/A	#N/A	#N/A	#N/A	#N/A	#N/A	#N/A	#N/A	#N/A	0	0	FALSE	?	FALSE
2	169879760	A	C	C	PASS	0/0	0/0	0/1	0/0	0/0	0/0	0/0	0/0	0/0	0/0	0/0	0/0	11	1	654		TRUE
2	170632768	G	T	T	PASS	0/0	0/0	0/0	0/0	0/0	0/0	0/0	0/0	0/0	0/0	0/0	0/1	11	1	655		TRUE
2	171142460	C	G	G	PASS	0/0	0/0	0/0	0/0	0/0	0/0	0/0	0/0	0/0	0/0	0/1	0/0	11	1	656		TRUE
2	171317096	C	T	T	PASS	0/0	0/0	0/0	0/0	0/0	0/0	0/1	0/0	0/0	0/0	0/0	0/0	11	1	657		TRUE
2	171470315	G	A	A	PASS	0/0	0/0	0/1	0/0	0/0	0/0	0/0	0/0	0/0	0/0	0/0	0/0	11	1	658		TRUE
2	171670673	A	G	G	PASS	0/0	0/0	0/0	0/0	0/1	0/0	0/0	0/0	0/0	0/0	0/0	0/0	11	1	659		TRUE
2	172066091	A	G	#N/A	#N/A	#N/A	#N/A	#N/A	#N/A	#N/A	#N/A	#N/A	#N/A	#N/A	#N/A	#N/A	#N/A	0	0	FALSE	FALSE	FALSE
2	172109099	C	T	T	PASS	0/0	0/0	0/1	0/0	0/0	0/0	0/0	0/0	0/0	0/0	0/0	0/0	11	1	660		TRUE
2	172113414	G	T	T	PASS	0/0	0/0	0/0	0/0	0/0	0/0	0/0	0/0	0/0	0/0	0/0	0/1	11	1	661		TRUE
2	172521997	G	T	T	PASS	0/1	0/0	0/0	0/0	0/0	0/0	0/0	0/0	0/0	0/0	0/0	0/0	11	1	662		TRUE
2	172838087	C	T	T	PASS	0/0	0/0	0/1	0/0	0/0	0/0	0/0	0/0	0/0	0/0	0/0	0/0	11	1	663		TRUE
2	172912921	C	T	T	PASS	0/0	0/0	0/0	0/0	0/0	0/0	0/0	0/0	0/0	0/0	0/0	0/1	11	1	664		TRUE
2	174512219	T	A	A	PASS	0/1	0/0	0/0	0/0	0/0	0/0	0/0	0/0	0/0	0/0	0/0	0/0	11	1	665		TRUE
2	174929659	G	A	A	PASS	0/0	0/0	0/0	0/0	0/0	0/0	0/0	0/0	0/0	0/0	0/0	0/1	11	1	666		TRUE
2	175161868	C	A	A	PASS	0/0	0/0	0/1	0/0	0/0	0/0	0/0	0/0	0/0	0/0	0/0	0/0	11	1	667		TRUE
2	179126200	A	C	C	PASS	0/0	0/0	0/0	0/1	0/0	0/0	0/0	0/0	0/0	0/0	0/0	0/0	11	1	668		TRUE
2	180345872	C	T	T	PASS	0/1	0/0	0/0	0/0	0/0	0/0	0/0	0/0	0/0	0/0	0/0	0/0	11	1	669		TRUE
2	180713738	T	A	A	PASS	0/0	0/0	0/0	0/0	0/1	0/0	0/0	0/0	0/0	0/0	0/0	0/0	11	1	670		TRUE
3	3034631	G	A	A	PASS	0/0	0/0	0/0	0/0	0/1	0/0	0/0	0/0	0/0	0/0	0/0	0/0	11	1	671		TRUE
3	3634010	A	C	C	PASS	0/0	0/0	0/0	0/0	0/0	0/0	0/1	0/0	0/0	0/0	0/0	0/0	11	1	672		TRUE
3	4210877	G	A	A	PASS	0/1	0/0	0/0	0/0	0/0	0/0	0/0	0/0	0/0	0/0	0/0	0/0	11	1	673		TRUE
3	4540500	T	G	G	PASS	0/0	0/0	0/0	0/1	0/0	0/0	0/0	0/0	0/0	0/0	0/0	0/0	11	1	674		TRUE
3	4716495	G	T	T	PASS	0/0	0/1	0/0	0/0	0/0	0/0	0/0	0/0	0/0	0/0	0/0	0/0	11	1	675		TRUE
3	5769159	G	A	A	PASS	0/0	0/0	0/0	0/0	0/0	0/1	0/0	0/0	0/0	0/0	0/0	0/0	11	1	676		TRUE
3	5927895	G	A	A	PASS	0/0	0/0	0/0	0/0	0/1	0/0	0/0	0/0	0/0	0/0	0/0	0/0	11	1	677		TRUE
3	6643699	C	T	T	PASS	0/0	0/0	0/0	0/1	0/0	0/0	0/0	0/0	0/0	0/0	0/0	0/0	11	1	678		TRUE
3	6746663	A	G	G	PASS	0/0	0/0	0/0	0/0	0/1	0/0	0/0	0/0	0/0	0/0	0/0	0/0	11	1	679		TRUE
3	6830695	C	A	A	PASS	0/0	0/0	0/0	0/0	0/1	0/0	0/0	0/0	0/0	0/0	0/0	0/0	11	1	680		TRUE
3	7723207	G	T	T	PASS	0/1	0/0	0/0	0/0	0/0	0/0	0/0	0/0	0/0	0/0	0/0	0/0	11	1	681		TRUE
3	8062180	T	C	C	PASS	0/0	0/0	0/0	0/0	0/0	0/0	0/1	0/0	0/0	0/0	0/0	0/0	11	1	682		TRUE
3	8826529	G	A	A	PASS	0/0	0/0	0/0	0/0	0/0	0/1	0/0	0/0	0/0	0/0	0/0	0/0	11	1	683		TRUE
3	10161196	T	C	C	PASS	0/0	0/1	0/0	0/0	0/0	0/0	0/0	0/0	0/0	0/0	0/0	0/0	11	1	684		TRUE
3	10563706	C	T	T	SNP_LowQualityDepth	0/1	0/0	0/0	0/0	0/0	0/0	0/0	0/0	0/0	0/0	0/0	0/0	11	1	FALSE	TRUE	TRUE
3	11053683	A	T	T	PASS	0/0	0/0	0/0	0/0	0/1	0/0	0/0	0/0	0/0	0/0	0/0	0/0	11	1	685		TRUE
3	11075195	G	T	T	PASS	0/0	0/0	0/1	0/0	0/0	0/0	0/0	0/0	0/0	0/0	0/0	0/0	11	1	686		TRUE
3	11075293	A	T	T	PASS	0/0	0/0	0/0	0/0	0/0	0/0	0/0	0/1	0/0	0/0	0/0	0/0	11	1	687		TRUE
3	11441503	C	A	A	PASS	0/0	0/0	0/0	0/0	0/0	0/0	0/0	0/0	0/1	0/0	0/0	0/0	11	1	688		TRUE
3	11584153	C	T	T	PASS	0/1	0/0	0/0	0/0	0/0	0/0	0/0	0/0	0/0	0/0	0/0	0/0	11	1	689		TRUE
3	11777698	C	T	T	PASS	0/0	0/0	0/0	0/0	0/1	0/0	0/0	0/0	0/0	0/0	0/0	0/0	11	1	690		TRUE
3	11901473	G	T	T	PASS	0/0	0/0	0/0	0/0	0/0	0/0	0/0	0/1	0/0	0/0	0/0	0/0	11	1	691		TRUE
3	12030242	A	G	G	SNP_LowQualityDepth	0/0	0/0	0/0	0/0	0/0	0/0	0/0	0/0	0/0	0/0	0/0	0/1	11	1	FALSE	TRUE	TRUE
3	12408861	A	C	C	PASS	0/1	0/0	0/0	0/0	0/0	0/0	0/0	0/0	0/0	0/0	0/0	0/0	11	1	692		TRUE
3	12458238	C	A	A	PASS	0/0	0/0	0/0	0/0	0/0	0/0	0/0	0/0	0/1	0/0	0/0	0/0	11	1	693		TRUE
3	12483035	A	T	T	PASS	0/1	0/0	0/0	0/0	0/0	0/0	0/0	0/0	0/0	0/0	0/0	0/0	11	1	694		TRUE
3	12792950	G	C	C	SNP_MappingQuality	0/0	0/0	0/0	0/0	0/0	0/0	0/0	0/0	0/0	0/0	0/1	0/0	11	1	FALSE	TRUE	TRUE
3	13924734	A	T	T	PASS	0/1	0/0	0/0	0/0	0/0	0/0	0/0	0/0	0/0	0/0	0/0	0/0	11	1	695		TRUE
3	14110298	G	T	#N/A	#N/A	#N/A	#N/A	#N/A	#N/A	#N/A	#N/A	#N/A	#N/A	#N/A	#N/A	#N/A	#N/A	0	0	FALSE	TRUE	TRUE
3	16118291	C	T	T	PASS	0/1	0/0	0/0	0/0	0/0	0/0	0/0	0/0	0/0	0/0	0/0	0/0	11	1	696		TRUE
3	16338840	C	A	A	PASS	0/0	0/0	0/1	0/0	0/0	0/0	0/0	0/0	0/0	0/0	0/0	0/0	11	1	697		TRUE
3	17887512	G	A	A	PASS	0/0	0/0	0/0	0/0	0/0	0/0	0/0	0/0	0/0	0/0	0/1	0/0	11	1	698		TRUE
3	18091501	A	C	C	PASS	0/0	0/0	0/0	0/0	0/0	0/0	0/1	0/0	0/0	0/0	0/0	0/0	11	1	699		TRUE
3	18181401	G	A	A	PASS	0/0	0/0	0/0	0/0	0/0	0/0	0/0	0/1	0/0	0/0	0/0	0/0	11	1	700		TRUE
3	18809050	G	A	A	PASS	0/0	0/0	0/0	0/0	0/0	0/0	0/0	0/0	0/0	0/0	0/1	0/0	11	1	701		TRUE
3	18861119	G	T	T	PASS	0/0	0/0	0/0	0/0	0/0	0/0	0/0	0/0	0/1	0/0	0/0	0/0	11	1	702		TRUE
3	20330252	A	G	G	PASS	0/0	0/0	0/0	0/1	0/0	0/0	0/0	0/0	0/0	0/0	0/0	0/0	11	1	703		TRUE
3	20893222	T	A	A	PASS	0/0	0/0	0/0	0/0	0/1	0/0	0/0	0/0	0/0	0/0	0/0	0/0	11	1	704		TRUE
3	21851691	G	C	C	PASS	0/0	0/0	0/0	0/0	0/1	0/0	0/0	0/0	0/0	0/0	0/0	0/0	11	1	705		TRUE
3	22366600	A	C	C	SnpCluster	0/1	0/0	0/0	0/0	0/0	0/0	0/0	0/0	0/0	0/0	0/0	0/0	11	1	FALSE	TRUE	TRUE
3	22471684	G	T	T	PASS	0/0	0/0	0/0	0/0	0/1	0/0	0/0	0/0	0/0	0/0	0/0	0/0	11	1	706		TRUE
3	23160564	A	G	G	PASS	0/0	0/0	0/0	0/1	0/0	0/0	0/0	0/0	0/0	0/0	0/0	0/0	11	1	707		TRUE
3	23292930	G	T	T	PASS	0/0	0/0	0/0	0/0	0/0	0/0	0/0	0/1	0/0	0/0	0/0	0/0	11	1	708		TRUE
3	24043955	T	C	C	PASS	0/0	0/0	0/0	0/1	0/0	0/0	0/0	0/0	0/0	0/0	0/0	0/0	11	1	709		TRUE
3	24262704	T	G	G	PASS	0/0	0/0	0/0	0/0	0/1	0/0	0/0	0/0	0/0	0/0	0/0	0/0	11	1	710		TRUE
3	24863356	T	G	G	PASS	0/0	0/0	0/0	0/1	0/0	0/0	0/0	0/0	0/0	0/0	0/0	0/0	11	1	711		TRUE
3	25023855	T	G	#N/A	#N/A	#N/A	#N/A	#N/A	#N/A	#N/A	#N/A	#N/A	#N/A	#N/A	#N/A	#N/A	#N/A	0	0	FALSE	FALSE	FALSE
3	26853145	T	G	G	PASS	0/0	0/0	0/0	0/0	0/1	0/0	0/0	0/0	0/0	0/0	0/0	0/0	11	1	712		TRUE
3	27178184	G	T	T	PASS	0/0	0/0	0/0	0/0	0/0	0/0	0/0	0/0	0/0	0/0	0/0	0/1	11	1	713		TRUE
3	29391650	G	A	A	PASS	0/0	0/0	0/0	0/0	0/0	0/0	0/0	0/0	0/0	0/0	0/1	0/0	11	1	714		TRUE
3	30216445	C	A	A	PASS	0/0	0/0	0/0	0/0	0/1	0/0	0/0	0/0	0/0	0/0	0/0	0/0	11	1	715		TRUE
3	30511197	T	G	G	PASS	0/0	0/1	0/0	0/0	0/0	0/0	0/0	0/0	0/0	0/0	0/0	0/0	11	1	716		TRUE
3	30577472	C	T	T	PASS	0/0	0/0	0/0	0/0	0/1	0/0	0/0	0/0	0/0	0/0	0/0	0/0	11	1	717		TRUE
3	31730121	G	A	A	PASS	0/1	0/0	0/0	0/0	0/0	0/0	0/0	0/0	0/0	0/0	0/0	0/0	11	1	718		TRUE
3	32206069	G	T	T	PASS	0/0	0/1	0/0	0/0	0/0	0/0	0/0	0/0	0/0	0/0	0/0	0/0	11	1	719		TRUE
3	32826294	T	C	C	PASS	0/0	0/0	0/0	0/0	0/0	0/0	0/0	0/0	0/0	0/0	0/1	0/0	11	1	720		TRUE
3	33160691	T	G	G	PASS	0/0	0/0	0/0	0/0	0/0	0/0	0/0	0/0	0/0	0/0	0/1	0/0	11	1	721		TRUE
3	33777239	C	T	T	PASS	0/0	0/0	0/0	0/0	0/0	0/0	0/0	0/0	0/0	0/0	0/0	0/1	11	1	722		TRUE
3	34235859	A	C	#N/A	#N/A	#N/A	#N/A	#N/A	#N/A	#N/A	#N/A	#N/A	#N/A	#N/A	#N/A	#N/A	#N/A	0	0	FALSE	FALSE	FALSE
3	34406581	G	A	A	PASS	0/0	0/0	0/0	0/1	0/0	0/0	0/0	0/0	0/0	0/0	0/0	0/0	11	1	723		TRUE
3	34413934	C	T	T	PASS	0/1	0/0	0/0	0/0	0/0	0/0	0/0	0/0	0/0	0/0	0/0	0/0	11	1	724		TRUE
3	34576213	T	A	A	PASS	0/0	0/0	0/0	0/0	0/0	0/0	0/0	0/1	0/0	0/0	0/0	0/0	11	1	725		TRUE
3	34908573	G	A	A	PASS	0/0	0/0	0/1	0/0	0/0	0/0	0/0	0/0	0/0	0/0	0/0	0/0	11	1	726		TRUE
3	35159959	A	T	T	SNP_LowQualityDepth	0/0	0/0	0/0	0/0	0/0	0/0	0/0	0/0	0/0	0/0	0/1	0/0	11	1	FALSE	TRUE	TRUE
3	36396570	G	T	T	PASS	0/0	0/0	0/0	0/1	0/0	0/0	0/0	0/0	0/0	0/0	0/0	0/0	11	1	727		TRUE
3	36723465	A	G	G	PASS	0/0	0/1	0/0	0/0	0/0	0/0	0/0	0/0	0/0	0/0	0/0	0/0	11	1	728		TRUE
3	36846448	C	A	A	PASS	0/1	0/0	0/0	0/0	0/0	0/0	0/0	0/0	0/0	0/0	0/0	0/0	11	1	729		TRUE
3	37419627	A	G	G	PASS	0/0	0/0	0/1	0/0	0/0	0/0	0/0	0/0	0/0	0/0	0/0	0/0	11	1	730		TRUE
3	39422711	G	C	C	PASS	0/0	0/0	0/0	0/0	0/0	0/0	0/0	0/0	0/0	0/0	0/1	0/0	11	1	731		TRUE
3	41459181	T	C	C	PASS	0/1	0/0	0/0	0/0	0/0	0/0	0/0	0/0	0/0	0/0	0/0	0/0	11	1	732		TRUE
3	42412126	G	T	T	PASS	0/1	0/0	0/0	0/0	0/0	0/0	0/0	0/0	0/0	0/0	0/0	0/0	11	1	733		TRUE
3	42574229	T	A	A	PASS	0/1	0/0	0/0	0/0	0/0	0/0	0/0	0/0	0/0	0/0	0/0	0/0	11	1	734		TRUE
3	42671303	A	T	T	PASS	0/0	0/0	0/0	0/1	0/0	0/0	0/0	0/0	0/0	0/0	0/0	0/0	11	1	735		TRUE
3	42979735	A	G	G	PASS	0/0	0/1	0/0	0/0	0/0	0/0	0/0	0/0	0/0	0/0	0/0	0/0	11	1	736		TRUE
3	43005604	C	A	A	PASS	0/0	0/0	0/0	0/0	0/0	0/0	0/0	0/1	0/0	0/0	0/0	0/0	11	1	737		TRUE
3	43177774	G	A	A	PASS	0/0	0/0	0/0	0/1	0/0	0/0	0/0	0/0	0/0	0/0	0/0	0/0	11	1	738		TRUE
3	43537293	G	A	A	PASS	0/0	0/0	0/0	0/0	0/0	0/0	0/0	0/0	0/0	0/0	0/1	0/0	11	1	739		TRUE
3	43595805	T	G	G	PASS	0/0	0/0	0/0	0/0	0/0	0/0	0/0	0/1	0/0	0/0	0/0	0/0	11	1	740		TRUE
3	43672060	T	G	G	PASS	0/0	0/0	0/1	0/0	0/0	0/0	0/0	0/0	0/0	0/0	0/0	0/0	11	1	741		TRUE
3	43989931	G	T	T	PASS	0/0	0/0	0/0	0/0	0/0	0/0	0/0	0/0	0/0	0/0	0/1	0/0	11	1	742		TRUE
3	44039061	G	T	T	PASS	0/0	0/0	0/1	0/0	0/0	0/0	0/0	0/0	0/0	0/0	0/0	0/0	11	1	743		TRUE
3	44107629	C	A	A	PASS	0/0	0/0	0/0	0/1	0/0	0/0	0/0	0/0	0/0	0/0	0/0	0/0	11	1	744		TRUE
3	44213710	G	T	T	PASS	0/0	0/0	0/0	0/0	0/0	0/0	0/0	0/0	0/0	0/0	0/0	0/1	11	1	745		TRUE
3	44279020	A	G	G	PASS	0/0	0/0	0/0	0/0	0/0	0/0	0/0	0/0	0/1	0/0	0/0	0/0	11	1	746		TRUE
3	44673651	G	T	T	PASS	0/0	0/0	0/0	0/0	0/0	0/1	0/0	0/0	0/0	0/0	0/0	0/0	11	1	747		TRUE
3	44833387	A	G	G	PASS	0/0	0/0	0/0	0/0	0/0	0/0	0/1	0/0	0/0	0/0	0/0	0/0	11	1	748		TRUE
3	45112700	G	A	A	PASS	0/0	0/0	0/1	0/0	0/0	0/0	0/0	0/0	0/0	0/0	0/0	0/0	11	1	749		TRUE
3	45299430	G	T	T	PASS	0/1	0/0	0/0	0/0	0/0	0/0	0/0	0/0	0/0	0/0	0/0	0/0	11	1	750		TRUE
3	45375480	T	A	A	PASS	0/0	0/0	0/1	0/0	0/0	0/0	0/0	0/0	0/0	0/0	0/0	0/0	11	1	751		TRUE
3	45948593	G	T	T	PASS	0/0	0/0	0/1	0/0	0/0	0/0	0/0	0/0	0/0	0/0	0/0	0/0	11	1	752		TRUE
3	46237779	G	T	T	PASS	0/0	0/0	0/1	0/0	0/0	0/0	0/0	0/0	0/0	0/0	0/0	0/0	11	1	753		TRUE
3	47391704	G	A	A	PASS	0/0	0/0	0/0	0/1	0/0	0/0	0/0	0/0	0/0	0/0	0/0	0/0	11	1	754		TRUE
3	47497813	C	T	T	PASS	0/0	0/0	0/1	0/0	0/0	0/0	0/0	0/0	0/0	0/0	0/0	0/0	11	1	755		TRUE
3	47570712	G	A	A	PASS	0/1	0/0	0/0	0/0	0/0	0/0	0/0	0/0	0/0	0/0	0/0	0/0	11	1	756		TRUE
3	47764073	T	C	C	PASS	0/0	0/0	0/1	0/0	0/0	0/0	0/0	0/0	0/0	0/0	0/0	0/0	11	1	757		TRUE
3	47794779	T	A	A	PASS	0/0	0/0	0/0	0/1	0/0	0/0	0/0	0/0	0/0	0/0	0/0	0/0	11	1	758		TRUE
3	47826472	C	A	A	PASS	0/0	0/0	0/0	0/0	0/0	0/0	0/0	0/1	0/0	0/0	0/0	0/0	11	1	759		TRUE
3	48022548	C	A	A	PASS	0/0	0/0	0/0	0/0	0/0	0/0	0/0	0/0	0/1	0/0	0/0	0/0	11	1	760		TRUE
3	48054270	C	T	T	PASS	0/0	0/1	0/0	0/0	0/0	0/0	0/0	0/0	0/0	0/0	0/0	0/0	11	1	761		TRUE
3	48286113	G	T	T	PASS	0/0	0/0	0/1	0/0	0/0	0/0	0/0	0/0	0/0	0/0	0/0	0/0	11	1	762		TRUE
3	48608488	G	T	T	SNP_LowQualityDepth	0/0	0/0	0/0	0/1	0/0	0/0	0/0	0/0	0/0	0/0	0/0	0/0	11	1	FALSE	TRUE	TRUE
3	48811228	T	G	G	PASS	0/0	0/0	0/1	0/0	0/0	0/0	0/0	0/0	0/0	0/0	0/0	0/0	11	1	763		TRUE
3	49876934	A	C	C	PASS	0/0	0/0	0/0	0/0	0/0	0/0	0/0	0/0	0/0	0/0	0/1	0/0	11	1	764		TRUE
3	50230797	T	G	G	PASS	0/0	0/0	0/1	0/0	0/0	0/0	0/0	0/0	0/0	0/0	0/0	0/0	11	1	765		TRUE
3	50689439	C	A	A	PASS	0/1	0/0	0/0	0/0	0/0	0/0	0/0	0/0	0/0	0/0	0/0	0/0	11	1	766		TRUE
3	51113569	C	A	A	PASS	0/0	0/0	0/0	0/0	0/1	0/0	0/0	0/0	0/0	0/0	0/0	0/0	11	1	767		TRUE
3	53889217	C	A	A	PASS	0/1	0/0	0/0	0/0	0/0	0/0	0/0	0/0	0/0	0/0	0/0	0/0	11	1	768		TRUE
3	53996700	A	G	G	PASS	0/0	0/0	0/0	0/0	0/0	0/0	0/1	0/0	0/0	0/0	0/0	0/0	11	1	769		TRUE
3	54267739	T	C	C	PASS	0/0	0/0	0/0	0/0	0/0	0/0	0/0	0/0	0/0	0/0	0/0	0/1	11	1	770		TRUE
3	55735986	C	T	T	PASS	0/0	0/0	0/1	0/0	0/0	0/0	0/0	0/0	0/0	0/0	0/0	0/0	11	1	771		TRUE
3	56767865	G	A	A	PASS	0/1	0/0	0/0	0/0	0/0	0/0	0/0	0/0	0/0	0/0	0/0	0/0	11	1	772		TRUE
3	57384100	C	T	T	PASS	0/0	0/0	0/1	0/0	0/0	0/0	0/0	0/0	0/0	0/0	0/0	0/0	11	1	773		TRUE
3	57423227	C	T	T	PASS	0/0	0/0	0/0	0/0	0/0	0/0	0/0	0/0	0/1	0/0	0/0	0/0	11	1	774		TRUE
3	59094545	C	A	A	PASS	0/0	0/1	0/0	0/0	0/0	0/0	0/0	0/0	0/0	0/0	0/0	0/0	11	1	775		TRUE
3	59873032	G	T	T	PASS	0/0	0/0	0/0	0/0	0/0	0/0	0/0	0/0	0/0	0/0	0/0	0/1	11	1	776		TRUE
3	60957568	A	T	T	PASS	0/1	0/0	0/0	0/0	0/0	0/0	0/0	0/0	0/0	0/0	0/0	0/0	11	1	777		TRUE
3	61023166	G	T	T	PASS	0/0	0/0	0/0	0/0	0/0	0/0	0/0	0/0	0/0	0/0	0/1	0/0	11	1	778		TRUE
3	62671809	C	T	T	PASS	0/0	0/0	0/0	0/1	0/0	0/0	0/0	0/0	0/0	0/0	0/0	0/0	11	1	779		TRUE
3	62783334	G	T	T	PASS	0/1	0/0	0/0	0/0	0/0	0/0	0/0	0/0	0/0	0/0	0/0	0/0	11	1	780		TRUE
3	62884904	T	A	A	PASS	0/0	0/0	0/0	0/0	0/1	0/0	0/0	0/0	0/0	0/0	0/0	0/0	11	1	781		TRUE
3	64382079	G	T	T	PASS	0/0	0/0	0/1	0/0	0/0	0/0	0/0	0/0	0/0	0/0	0/0	0/0	11	1	782		TRUE
3	64439966	G	A	A	PASS	0/0	0/0	0/0	0/1	0/0	0/0	0/0	0/0	0/0	0/0	0/0	0/0	11	1	783		TRUE
3	65512388	T	A	A	PASS	0/0	0/0	0/0	0/1	0/0	0/0	0/0	0/0	0/0	0/0	0/0	0/0	11	1	784		TRUE
3	65931262	G	C	C	PASS	0/0	0/0	0/0	0/1	0/0	0/0	0/0	0/0	0/0	0/0	0/0	0/0	11	1	785		TRUE
3	66188058	C	T	T	PASS	0/0	0/0	0/0	0/0	0/1	0/0	0/0	0/0	0/0	0/0	0/0	0/0	11	1	786		TRUE
3	66373778	G	A	A	PASS	0/0	0/0	0/0	0/0	0/0	0/0	0/0	0/0	0/1	0/0	0/0	0/0	11	1	787		TRUE
3	66678046	C	A	A	PASS	0/0	0/0	0/0	0/0	0/1	0/0	0/0	0/0	0/0	0/0	0/0	0/0	11	1	788		TRUE
3	67756134	T	A	A	PASS	0/0	0/0	0/0	0/0	0/0	0/0	0/0	0/0	0/0	0/0	0/1	0/0	11	1	789		TRUE
3	68453965	G	A	A	PASS	0/0	0/0	0/0	0/0	0/0	0/1	0/0	0/0	0/0	0/0	0/0	0/0	11	1	790		TRUE
3	69297473	C	T	T	PASS	0/0	0/1	0/0	0/0	0/0	0/0	0/0	0/0	0/0	0/0	0/0	0/0	11	1	791		TRUE
3	70357461	G	A	A	PASS	0/0	0/0	0/0	0/0	0/0	0/0	0/0	0/0	0/1	0/0	0/0	0/0	11	1	792		TRUE
3	70550664	G	A	A	PASS	0/0	0/0	0/1	0/0	0/0	0/0	0/0	0/0	0/0	0/0	0/0	0/0	11	1	793		TRUE
3	70753902	A	T	T	PASS	0/0	0/0	0/1	0/0	0/0	0/0	0/0	0/0	0/0	0/0	0/0	0/0	11	1	794		TRUE
3	70755695	A	C	C	PASS	0/0	0/0	0/0	0/0	0/0	0/0	0/0	0/0	0/1	0/0	0/0	0/0	11	1	795		TRUE
3	71236283	G	T	T	PASS	0/1	0/0	0/0	0/0	0/0	0/0	0/0	0/0	0/0	0/0	0/0	0/0	11	1	796		TRUE
3	71345627	C	T	T	PASS	0/0	0/0	0/0	0/0	0/0	0/0	0/0	0/0	0/0	0/0	0/0	0/1	11	1	797		TRUE
3	71363550	A	C	C	PASS	0/0	0/0	0/0	0/0	0/0	0/0	0/0	0/0	0/0	0/0	0/1	0/0	11	1	798		TRUE
3	71482837	C	A	A	PASS	0/0	0/0	0/0	0/0	0/0	0/1	0/0	0/0	0/0	0/0	0/0	0/0	11	1	799		TRUE
3	71615963	C	T	T	PASS	0/0	0/0	0/0	0/0	0/1	0/0	0/0	0/0	0/0	0/0	0/0	0/0	11	1	800		TRUE
3	71633963	G	T	T	PASS	0/0	0/0	0/1	0/0	0/0	0/0	0/0	0/0	0/0	0/0	0/0	0/0	11	1	801		TRUE
3	72098075	C	G	G	PASS	0/0	0/0	0/0	0/0	0/1	0/0	0/0	0/0	0/0	0/0	0/0	0/0	11	1	802		TRUE
3	72125813	T	C	C	PASS	0/0	0/0	0/0	0/0	0/0	0/0	0/0	0/0	0/1	0/0	0/0	0/0	11	1	803		TRUE
3	72371349	C	T	T	PASS	0/0	0/0	0/0	0/1	0/0	0/0	0/0	0/0	0/0	0/0	0/0	0/0	11	1	804		TRUE
3	72546811	G	T	T	PASS	0/0	0/0	0/0	0/0	0/0	0/0	0/1	0/0	0/0	0/0	0/0	0/0	11	1	805		TRUE
3	72984831	G	A	A	PASS	0/0	0/0	0/0	0/0	0/0	0/0	0/0	0/0	0/0	0/0	0/1	0/0	11	1	806		TRUE
3	73934706	G	T	T	PASS	0/0	0/0	0/0	0/0	0/1	0/0	0/0	0/0	0/0	0/0	0/0	0/0	11	1	807		TRUE
3	73974827	T	C	C	PASS	0/0	0/0	0/0	0/0	0/0	0/0	0/0	0/1	0/0	0/0	0/0	0/0	11	1	808		TRUE
3	74263178	G	T	T	PASS	0/0	0/0	0/1	0/0	0/0	0/0	0/0	0/0	0/0	0/0	0/0	0/0	11	1	809		TRUE
3	74272957	C	T	T	PASS	0/0	0/0	0/0	0/0	0/0	0/0	0/1	0/0	0/0	0/0	0/0	0/0	11	1	810		TRUE
3	74768772	A	G	G	PASS	0/0	0/0	0/0	0/0	0/0	0/0	0/0	0/1	0/0	0/0	0/0	0/0	11	1	811		TRUE
3	75092243	G	T	T	PASS	0/0	0/0	0/0	0/0	0/0	0/0	0/0	0/1	0/0	0/0	0/0	0/0	11	1	812		TRUE
3	76170683	A	C	#N/A	#N/A	#N/A	#N/A	#N/A	#N/A	#N/A	#N/A	#N/A	#N/A	#N/A	#N/A	#N/A	#N/A	0	0	FALSE	?	FALSE
3	76461320	C	A	A	PASS	0/1	0/0	0/0	0/0	0/0	0/0	0/0	0/0	0/0	0/0	0/0	0/0	11	1	813		TRUE
3	76959323	G	T	T	PASS	0/0	0/0	0/0	0/0	0/0	0/0	0/0	0/1	0/0	0/0	0/0	0/0	11	1	814		TRUE
3	77404543	A	T	T	PASS	0/0	0/0	0/0	0/0	0/0	0/0	0/0	0/0	0/0	0/0	0/0	0/1	11	1	815		TRUE
3	77469311	G	T	T	PASS	0/0	0/0	0/1	0/0	0/0	0/0	0/0	0/0	0/0	0/0	0/0	0/0	11	1	816		TRUE
3	77523780	C	T	T	PASS	0/0	0/0	0/0	0/0	0/0	0/0	0/1	0/0	0/0	0/0	0/0	0/0	11	1	817		TRUE
3	77546665	C	T	T	PASS	0/0	0/0	0/0	0/0	0/1	0/0	0/0	0/0	0/0	0/0	0/0	0/0	11	1	818		TRUE
3	77608845	T	G	G	PASS	0/0	0/0	0/0	0/1	0/0	0/0	0/0	0/0	0/0	0/0	0/0	0/0	11	1	819		TRUE
3	78462602	C	A	A	PASS	0/0	0/0	0/0	0/1	0/0	0/0	0/0	0/0	0/0	0/0	0/0	0/0	11	1	820		TRUE
3	78653815	G	A	A	PASS	0/0	0/0	0/0	0/1	0/0	0/0	0/0	0/0	0/0	0/0	0/0	0/0	11	1	821		TRUE
3	80277074	C	A	A	PASS	0/0	0/0	0/0	0/0	0/0	0/0	0/1	0/0	0/0	0/0	0/0	0/0	11	1	822		TRUE
3	81749472	T	A	#N/A	#N/A	#N/A	#N/A	#N/A	#N/A	#N/A	#N/A	#N/A	#N/A	#N/A	#N/A	#N/A	#N/A	0	0	FALSE	TRUE	TRUE
3	82072608	T	C	C	PASS	0/1	0/0	0/0	0/0	0/0	0/0	0/0	0/0	0/0	0/0	0/0	0/0	11	1	823		TRUE
3	83111158	G	T	T	PASS	0/1	0/0	0/0	0/0	0/0	0/0	0/0	0/0	0/0	0/0	0/0	0/0	11	1	824		TRUE
3	83724196	G	A	A	PASS	0/0	0/0	0/0	0/1	0/0	0/0	0/0	0/0	0/0	0/0	0/0	0/0	11	1	825		TRUE
3	84246915	A	G	G	PASS	0/0	0/0	0/1	0/0	0/0	0/0	0/0	0/0	0/0	0/0	0/0	0/0	11	1	826		TRUE
3	84684464	G	T	T	PASS	0/1	0/0	0/0	0/0	0/0	0/0	0/0	0/0	0/0	0/0	0/0	0/0	11	1	827		TRUE
3	85212096	C	A	A	PASS	0/0	0/1	0/0	0/0	0/0	0/0	0/0	0/0	0/0	0/0	0/0	0/0	11	1	828		TRUE
3	87990238	G	T	T	PASS	0/0	0/0	0/0	0/0	0/0	0/0	0/0	0/1	0/0	0/0	0/0	0/0	11	1	829		TRUE
3	88211579	T	C	C	PASS	0/0	0/0	0/0	0/0	0/0	0/1	0/0	0/0	0/0	0/0	0/0	0/0	11	1	830		TRUE
3	88608711	C	G	G	PASS	0/0	0/0	0/0	0/1	0/0	0/0	0/0	0/0	0/0	0/0	0/0	0/0	11	1	831		TRUE
3	91561360	T	A	A	PASS	0/0	0/0	0/1	0/0	0/0	0/0	0/0	0/0	0/0	0/0	0/0	0/0	11	1	832		TRUE
3	92597835	T	G	G	PASS	0/0	0/0	0/0	0/0	0/0	0/0	0/0	0/0	0/0	0/0	0/1	0/0	11	1	833		TRUE
3	92804012	C	T	T	PASS	0/0	0/0	0/0	0/0	0/0	0/0	0/0	0/1	0/0	0/0	0/0	0/0	11	1	834		TRUE
3	93525407	A	G	#N/A	#N/A	#N/A	#N/A	#N/A	#N/A	#N/A	#N/A	#N/A	#N/A	#N/A	#N/A	#N/A	#N/A	0	0	FALSE	FALSE	FALSE
3	99332240	G	A	A	PASS	0/0	0/0	0/1	0/0	0/0	0/0	0/0	0/0	0/0	0/0	0/0	0/0	11	1	835		TRUE
3	99631608	T	C	C	PASS	0/0	0/0	0/0	0/1	0/0	0/0	0/0	0/0	0/0	0/0	0/0	0/0	11	1	836		TRUE
3	100923742	C	A	A	PASS	0/0	0/0	0/0	0/0	0/0	0/0	0/0	0/1	0/0	0/0	0/0	0/0	11	1	837		TRUE
3	101979102	G	A	A,*	SnpCluster	0/0	0/0	0/1	0/1	0/1	0/0	0/1	0/1	0/1	0/0	0/0	0/2	5	0	FALSE	?	FALSE
3	102552053	C	A	A	PASS	0/0	0/0	0/0	0/1	0/0	0/0	0/0	0/0	0/0	0/0	0/0	0/0	11	1	838		TRUE
3	102752117	G	A	A	PASS	0/0	0/0	0/0	0/0	0/1	0/0	0/0	0/0	0/0	0/0	0/0	0/0	11	1	839		TRUE
3	103310637	G	A	A	PASS	0/0	0/0	0/0	0/1	0/0	0/0	0/0	0/0	0/0	0/0	0/0	0/0	11	1	840		TRUE
3	103741221	T	A	A	PASS	0/0	0/0	0/1	0/0	0/0	0/0	0/0	0/0	0/0	0/0	0/0	0/0	11	1	841		TRUE
3	104391364	G	T	T	PASS	0/0	0/0	0/0	0/0	0/0	0/0	0/0	0/0	0/0	0/0	0/0	0/1	11	1	842		TRUE
3	105709392	C	T	T	PASS	0/0	0/0	0/0	0/0	0/0	0/0	0/0	0/0	0/0	0/0	0/0	0/1	11	1	843		TRUE
3	106632072	T	G	G	PASS	0/0	0/0	0/1	0/0	0/0	0/0	0/0	0/0	0/0	0/0	0/0	0/0	11	1	844		TRUE
3	108052441	C	A	A	PASS	0/0	0/0	0/0	0/0	0/1	0/0	0/0	0/0	0/0	0/0	0/0	0/0	11	1	845		TRUE
3	108548444	C	A	A	PASS	0/0	0/0	0/1	0/0	0/0	0/0	0/0	0/0	0/0	0/0	0/0	0/0	11	1	846		TRUE
3	109266890	G	A	A	PASS	0/0	0/0	0/0	0/1	0/0	0/0	0/0	0/0	0/0	0/0	0/0	0/0	11	1	847		TRUE
3	109866721	T	A	A	PASS	0/1	0/0	0/0	0/0	0/0	0/0	0/0	0/0	0/0	0/0	0/0	0/0	11	1	848		TRUE
3	110376383	C	T	T	PASS	0/0	0/0	0/0	0/0	0/0	0/0	0/0	0/0	0/1	0/0	0/0	0/0	11	1	849		TRUE
3	110884571	A	G	G	PASS	0/0	0/0	0/0	0/0	0/0	0/0	0/0	0/1	0/0	0/0	0/0	0/0	11	1	850		TRUE
3	110918365	A	G	G	PASS	0/0	0/0	0/0	0/1	0/0	0/0	0/0	0/0	0/0	0/0	0/0	0/0	11	1	851		TRUE
3	110929282	G	T	T	PASS	0/0	0/0	0/0	0/0	0/0	0/0	0/0	0/0	0/1	0/0	0/0	0/0	11	1	852		TRUE
3	111010799	T	G	G	PASS	0/1	0/0	0/0	0/0	0/0	0/0	0/0	0/0	0/0	0/0	0/0	0/0	11	1	853		TRUE
3	111074202	A	G	G	PASS	0/0	0/0	0/0	0/0	0/0	0/0	0/0	0/0	0/0	0/0	0/1	0/0	11	1	854		TRUE
3	111372348	G	A	A	PASS	0/1	0/0	0/0	0/0	0/0	0/0	0/0	0/0	0/0	0/0	0/0	0/0	11	1	855		TRUE
3	111628797	G	A	A	PASS	0/0	0/0	0/0	0/0	0/0	0/0	0/1	0/0	0/0	0/0	0/0	0/0	11	1	856		TRUE
3	111974622	G	T	T	PASS	0/1	0/0	0/0	0/0	0/0	0/0	0/0	0/0	0/0	0/0	0/0	0/0	11	1	857		TRUE
3	112051443	A	T	T	PASS	0/0	0/0	0/0	0/0	0/0	0/0	0/0	0/0	0/0	0/0	0/1	0/0	11	1	858		TRUE
3	112732674	C	A	A	PASS	0/1	0/0	0/0	0/0	0/0	0/0	0/0	0/0	0/0	0/0	0/0	0/0	11	1	859		TRUE
3	112854884	G	T	T	PASS	0/0	0/0	0/1	0/0	0/0	0/0	0/0	0/0	0/0	0/0	0/0	0/0	11	1	860		TRUE
3	113108495	G	A	A	PASS	0/1	./.	0/1	1/1	1/1	0/1	./.	./.	0/1	0/1	1/1	./.	0	1	FALSE	TRUE	TRUE
3	113883173	T	A	A	PASS	0/1	0/0	0/0	0/0	0/0	0/0	0/0	0/0	0/0	0/0	0/0	0/0	11	1	861		TRUE
3	114386095	C	G	G	PASS	0/0	0/1	0/0	0/0	0/0	0/0	0/0	0/0	0/0	0/0	0/0	0/0	11	1	862		TRUE
3	114556546	A	G	G	PASS	0/0	0/0	0/0	0/0	0/1	0/0	0/0	0/0	0/0	0/0	0/0	0/0	11	1	863		TRUE
3	114847060	A	T	T	PASS	0/0	0/0	0/0	0/1	0/0	0/0	0/0	0/0	0/0	0/0	0/0	0/0	11	1	864		TRUE
3	115000285	T	A	A	PASS	0/1	0/0	0/0	0/0	0/0	0/0	0/0	0/0	0/0	0/0	0/0	0/0	11	1	865		TRUE
3	115297905	C	A	A	PASS	0/0	0/0	0/0	0/0	0/0	0/0	0/1	0/0	0/0	0/0	0/0	0/0	11	1	866		TRUE
3	115343905	G	T	T	PASS	0/0	0/0	0/1	0/0	0/0	0/0	0/0	0/0	0/0	0/0	0/0	0/0	11	1	867		TRUE
3	115807151	C	T	T	PASS	0/0	0/0	0/1	0/0	0/0	0/0	0/0	0/0	0/0	0/0	0/0	0/0	11	1	868		TRUE
3	116941054	C	A	A	PASS	0/0	0/0	0/0	0/0	0/0	0/0	0/0	0/1	0/0	0/0	0/0	0/0	11	1	869		TRUE
3	119177612	C	G	G	PASS	0/0	0/0	0/0	0/0	0/0	0/0	0/0	0/0	0/0	0/0	0/1	0/0	11	1	870		TRUE
3	119196920	A	T	T	PASS	0/0	0/0	0/0	0/0	0/0	0/0	0/0	0/0	0/0	0/0	0/1	0/0	11	1	871		TRUE
3	120316726	G	T	T	PASS	0/0	0/0	0/0	0/0	0/1	0/0	0/0	0/0	0/0	0/0	0/0	0/0	11	1	872		TRUE
3	121908720	G	T	T	PASS	0/0	0/0	0/1	0/0	0/0	0/0	0/0	0/0	0/0	0/0	0/0	0/0	11	1	873		TRUE
3	122003285	C	T	T	PASS	0/0	0/0	0/0	0/0	0/0	0/0	0/0	0/1	0/0	0/0	0/0	0/0	11	1	874		TRUE
3	122556055	G	T	T	PASS	0/0	0/0	0/0	0/0	0/1	0/0	0/0	0/0	0/0	0/0	0/0	0/0	11	1	875		TRUE
3	123582861	G	A	A	PASS	0/0	0/0	0/0	0/1	0/0	0/0	0/0	0/0	0/0	0/0	0/0	0/0	11	1	876		TRUE
3	124434827	G	A	A	PASS	0/0	0/0	0/0	0/1	0/0	0/0	0/0	0/0	0/0	0/0	0/0	0/0	11	1	877		TRUE
3	125167781	A	C	C	PASS	0/0	0/0	0/1	0/0	0/0	0/0	0/0	0/0	0/0	0/0	0/0	0/0	11	1	878		TRUE
3	125867457	G	T	T	PASS	0/0	0/0	0/0	0/0	0/0	0/1	0/0	0/0	0/0	0/0	0/0	0/0	11	1	879		TRUE
3	126056133	A	G	G	PASS	0/0	0/0	0/0	0/0	0/0	0/0	0/0	0/0	0/0	0/0	0/1	0/0	11	1	880		TRUE
3	126511549	C	A	A	PASS	0/0	0/1	0/0	0/0	0/0	0/0	0/0	0/0	0/0	0/0	0/0	0/0	11	1	881		TRUE
3	126922453	G	A	A	PASS	0/0	0/0	0/0	0/0	0/0	0/0	0/0	0/1	0/0	0/0	0/0	0/0	11	1	882		TRUE
3	127347410	G	T	T	PASS	0/0	0/0	0/0	0/0	0/0	0/0	0/0	0/0	0/1	0/0	0/0	0/0	11	1	883		TRUE
3	127348451	G	A	A	PASS	0/1	0/0	0/0	0/0	0/0	0/0	0/0	0/0	0/0	0/0	0/0	0/0	11	1	884		TRUE
3	127460195	G	T	T	PASS	0/0	0/0	0/0	0/0	0/1	0/0	0/0	0/0	0/0	0/0	0/0	0/0	11	1	885		TRUE
3	128331595	T	G	G	SNP_LowQualityDepth	0/0	0/0	0/0	0/0	0/0	0/0	0/0	0/0	0/1	0/0	0/0	0/0	11	1	FALSE	TRUE	TRUE
3	128493149	C	A	A	PASS	0/0	0/0	0/1	0/0	0/0	0/0	0/0	0/0	0/0	0/0	0/0	0/0	11	1	886		TRUE
3	128724958	G	A	A	PASS	0/0	0/0	0/0	0/0	0/0	0/0	0/0	0/0	0/0	0/0	0/1	0/0	11	1	887		TRUE
3	129684217	C	T	#N/A	#N/A	#N/A	#N/A	#N/A	#N/A	#N/A	#N/A	#N/A	#N/A	#N/A	#N/A	#N/A	#N/A	0	0	FALSE	FALSE	FALSE
3	129853004	G	A	A	PASS	0/0	0/0	0/0	0/0	0/0	0/1	0/0	0/0	0/0	0/0	0/0	0/0	11	1	888		TRUE
3	130524780	T	C	#N/A	#N/A	#N/A	#N/A	#N/A	#N/A	#N/A	#N/A	#N/A	#N/A	#N/A	#N/A	#N/A	#N/A	0	0	FALSE	FALSE	FALSE
3	131107375	T	G	G	PASS	0/0	0/0	0/0	0/0	0/0	0/0	0/0	0/0	0/0	0/0	0/1	0/0	11	1	889		TRUE
3	131738625	G	T	T	PASS	0/0	0/0	0/1	0/0	0/0	0/0	0/0	0/0	0/0	0/0	0/0	0/0	11	1	890		TRUE
3	133607837	T	A	A	PASS	0/0	0/0	0/0	0/0	0/0	0/0	0/0	0/1	0/0	0/0	0/0	0/0	11	1	891		TRUE
3	134372422	C	A	A	PASS	0/0	0/0	0/0	0/0	0/1	0/0	0/0	0/0	0/0	0/0	0/0	0/0	11	1	892		TRUE
3	135107252	G	A	A	PASS	0/0	0/0	0/1	0/0	0/0	0/0	0/0	0/0	0/0	0/0	0/0	0/0	11	1	893		TRUE
3	135340521	C	G	G	PASS	0/1	0/0	0/0	0/0	0/0	0/0	0/0	0/0	0/0	0/0	0/0	0/0	11	1	894		TRUE
3	136299426	G	A	A	PASS	0/1	0/0	0/0	0/0	0/0	0/0	0/0	0/0	0/0	0/0	0/0	0/0	11	1	895		TRUE
3	136967961	G	T	T	PASS	0/0	0/0	0/0	0/0	0/1	0/0	0/0	0/0	0/0	0/0	0/0	0/0	11	1	896		TRUE
3	137880144	G	T	T	PASS	0/0	0/0	0/0	0/0	0/0	0/0	0/0	0/0	0/1	0/0	0/0	0/0	11	1	897		TRUE
3	138827969	G	A	A	PASS	0/0	0/0	0/0	0/1	0/0	0/0	0/0	0/0	0/0	0/0	0/0	0/0	11	1	898		TRUE
3	139556728	T	G	G	PASS	0/1	0/0	0/0	0/0	0/0	0/0	0/0	0/0	0/0	0/0	0/0	0/0	11	1	899		TRUE
3	139617650	T	C	C	PASS	0/0	0/1	0/0	0/0	0/0	0/0	0/0	0/0	0/0	0/0	0/0	0/0	11	1	900		TRUE
3	139960272	T	A	A	PASS	0/0	0/0	0/1	0/0	0/0	0/0	0/0	0/0	0/0	0/0	0/0	0/0	11	1	901		TRUE
3	140240733	C	T	T	PASS	0/0	0/0	0/0	0/0	0/0	0/0	0/0	0/0	0/0	0/0	0/1	0/0	11	1	902		TRUE
3	140334159	C	A	A	PASS	0/0	0/0	0/0	0/0	0/0	0/0	0/0	0/1	0/0	0/0	0/0	0/0	11	1	903		TRUE
3	140652879	C	T	T	SnpCluster	0/0	0/0	0/0	0/0	0/1	0/0	0/0	0/0	0/0	0/0	0/0	0/0	11	1	FALSE	TRUE	TRUE
3	141537508	C	A	A	PASS	0/0	0/0	0/0	0/0	0/0	0/0	0/0	0/0	0/1	0/0	0/0	0/0	11	1	904		TRUE
3	141572389	C	T	T	PASS	0/0	0/0	0/0	0/0	0/0	0/0	0/0	0/0	0/0	0/0	0/1	0/0	11	1	905		TRUE
3	141624642	G	A	A	PASS	0/0	0/0	0/1	0/0	0/0	0/0	0/0	0/0	0/0	0/0	0/0	0/0	11	1	906		TRUE
3	142628581	G	A	A	PASS	0/0	0/1	0/0	0/0	0/0	0/0	0/0	0/0	0/0	0/0	0/0	0/0	11	1	907		TRUE
3	143402012	C	T	T	PASS	0/0	0/0	0/0	0/0	0/1	0/0	0/0	0/0	0/0	0/0	0/0	0/0	11	1	908		TRUE
3	144965459	A	G	G	PASS	0/0	0/0	0/0	0/0	0/0	0/0	0/0	0/0	0/1	0/0	0/0	0/0	11	1	909		TRUE
3	145191034	C	A	A	PASS	0/0	0/0	0/0	0/0	0/0	0/0	0/0	0/0	0/0	0/0	0/1	0/0	11	1	910		TRUE
3	146839849	G	T	T	PASS	0/0	0/0	0/0	0/1	0/0	0/0	0/0	0/0	0/0	0/0	0/0	0/0	11	1	911		TRUE
3	147749986	G	T	T	PASS	0/0	0/0	0/0	0/0	0/0	0/0	0/0	0/0	0/1	0/0	0/0	0/0	11	1	912		TRUE
3	147884064	G	T	T	PASS	0/0	0/0	0/1	0/0	0/0	0/0	0/0	0/0	0/0	0/0	0/0	0/0	11	1	913		TRUE
3	147976778	C	A	A	PASS	0/0	0/0	0/0	0/0	0/0	0/0	0/0	0/0	0/0	0/0	0/1	0/0	11	1	914		TRUE
3	149478855	T	C	C	PASS	0/0	0/0	0/0	0/0	0/1	0/0	0/0	0/0	0/0	0/0	0/0	0/0	11	1	915		TRUE
3	149729160	G	A	A	PASS	0/0	0/0	0/0	0/0	0/0	0/0	0/1	0/0	0/0	0/0	0/0	0/0	11	1	916		TRUE
3	149996204	G	C	C	PASS	0/0	0/0	0/0	0/0	0/0	0/0	0/0	0/0	0/0	0/0	0/1	0/0	11	1	917		TRUE
3	150996117	G	A	A	PASS	0/1	0/0	0/0	0/0	0/0	0/0	0/0	0/0	0/0	0/0	0/0	0/0	11	1	918		TRUE
3	151076067	G	T	T	PASS	0/0	0/0	0/0	0/0	0/0	0/0	0/0	0/1	0/0	0/0	0/0	0/0	11	1	919		TRUE
3	151723849	T	C	C	PASS	0/0	0/0	0/0	0/0	0/0	0/0	0/0	0/0	0/0	0/0	0/0	0/1	11	1	920		TRUE
3	152032817	G	T	T	PASS	0/0	0/0	0/1	0/0	0/0	0/0	0/0	0/0	0/0	0/0	0/0	0/0	11	1	921		TRUE
3	153071626	A	C	C	PASS	0/0	0/0	0/0	0/0	0/0	0/0	0/1	0/0	0/0	0/0	0/0	0/0	11	1	922		TRUE
3	153338516	C	T	T	PASS	0/0	0/0	0/1	0/0	0/0	0/0	0/0	0/0	0/0	0/0	0/0	0/0	11	1	923		TRUE
3	153596811	T	G	G	PASS	0/0	0/0	0/0	0/0	0/0	0/0	0/0	0/0	0/0	0/0	0/1	0/0	11	1	924		TRUE
3	153977726	T	C	C	SnpCluster	0/0	0/0	0/0	0/0	0/0	0/0	0/0	0/0	0/0	0/0	0/1	0/0	11	1	FALSE	TRUE	TRUE
3	154707725	G	A	A	PASS	0/1	0/0	0/0	0/0	0/0	0/0	0/0	0/0	0/0	0/0	0/0	0/0	11	1	925		TRUE
3	156417462	G	T	T	PASS	0/0	0/0	0/1	0/0	0/0	0/0	0/0	0/0	0/0	0/0	0/0	0/0	11	1	926		TRUE
3	156583654	T	C	C	PASS	0/0	0/0	0/1	0/0	0/0	0/0	0/0	0/0	0/0	0/0	0/0	0/0	11	1	927		TRUE
3	156982417	C	A	A	PASS	0/0	0/0	0/0	0/0	0/0	0/0	0/1	0/0	0/0	0/0	0/0	0/0	11	1	928		TRUE
3	157282940	A	C	C	PASS	0/0	0/0	0/0	0/0	0/1	0/0	0/0	0/0	0/0	0/0	0/0	0/0	11	1	929		TRUE
3	157520204	A	T	T	PASS	0/0	0/0	0/1	0/0	0/0	0/0	0/0	0/0	0/0	0/0	0/0	0/0	11	1	930		TRUE
3	157520205	A	G	G	PASS	0/0	0/0	0/1	0/0	0/0	0/0	0/0	0/0	0/0	0/0	0/0	0/0	11	1	931		TRUE
3	158616919	G	C	C	PASS	0/0	0/0	0/0	0/1	0/0	0/0	0/0	0/0	0/0	0/0	0/0	0/0	11	1	932		TRUE
3	159121098	G	T	#N/A	#N/A	#N/A	#N/A	#N/A	#N/A	#N/A	#N/A	#N/A	#N/A	#N/A	#N/A	#N/A	#N/A	0	0	FALSE	TRUE	TRUE
3	159494171	C	A	A	PASS	0/0	0/0	0/0	0/0	0/0	0/0	0/1	0/0	0/0	0/0	0/0	0/0	11	1	933		TRUE
3	159570501	G	A	A	PASS	0/0	0/0	0/0	0/0	0/1	0/0	0/0	0/0	0/0	0/0	0/0	0/0	11	1	934		TRUE
3	159716270	A	G	G	PASS	0/0	0/0	0/1	0/0	0/0	0/0	0/0	0/0	0/0	0/0	0/0	0/0	11	1	935		TRUE
4	4169346	A	T	T	PASS	0/0	0/0	0/0	0/0	0/1	0/0	0/0	0/0	0/0	0/0	0/0	0/0	11	1	936		TRUE
4	4491108	C	T	T	SNP_LowQualityDepth	0/0	0/0	0/0	0/0	0/0	0/0	0/0	0/0	0/0	0/0	0/0	0/1	11	1	FALSE	TRUE	TRUE
4	4943636	G	T	T	PASS	0/0	0/0	0/0	0/0	0/0	0/0	0/0	0/1	0/0	0/0	0/0	0/0	11	1	937		TRUE
4	5118825	A	G	G	PASS	0/0	0/0	0/0	0/0	0/0	0/0	0/1	0/0	0/0	0/0	0/0	0/0	11	1	938		TRUE
4	7710721	C	A	A	SnpCluster	0/1	0/0	0/0	0/0	0/0	0/0	0/0	0/0	0/0	0/0	0/0	0/0	11	1	FALSE	TRUE	TRUE
4	7948612	C	A	A	PASS	0/0	0/0	0/0	0/0	0/0	0/0	0/0	0/0	0/0	0/0	0/1	0/0	11	1	939		TRUE
4	9472803	T	C	C	PASS	0/0	0/0	0/0	0/0	0/0	0/1	0/0	0/0	0/0	0/0	0/0	0/0	11	1	940		TRUE
4	10153685	G	T	T	PASS	0/0	0/0	0/0	0/0	0/0	0/0	0/0	0/0	0/0	0/0	0/1	0/0	11	1	941		TRUE
4	10185360	A	T	T	PASS	0/0	0/0	0/0	0/0	0/0	0/1	0/0	0/0	0/0	0/0	0/0	0/0	11	1	942		TRUE
4	10662299	G	T	T	PASS	0/0	0/0	0/0	0/0	0/0	0/0	0/0	0/1	0/0	0/0	0/0	0/0	11	1	943		TRUE
4	12309907	C	T	T	PASS	0/1	0/0	0/0	0/0	0/0	0/0	0/0	0/0	0/0	0/0	0/0	0/0	11	1	944		TRUE
4	12557547	G	T	T	PASS	0/0	0/0	0/0	0/0	0/0	0/0	0/0	0/0	0/0	0/0	0/1	0/0	11	1	945		TRUE
4	13041076	C	A	A	PASS	0/0	0/1	0/0	0/0	0/0	0/0	0/0	0/0	0/0	0/0	0/0	0/0	11	1	946		TRUE
4	13634211	A	C	C	PASS	0/0	0/0	0/0	0/0	0/0	0/0	0/0	0/0	0/0	0/0	0/1	0/0	11	1	947		TRUE
4	13645657	C	A	A	PASS	0/1	0/0	0/0	0/0	0/0	0/0	0/0	0/0	0/0	0/0	0/0	0/0	11	1	948		TRUE
4	13663158	G	T	T	PASS	0/0	0/0	0/0	0/0	0/0	0/0	0/0	0/0	0/1	0/0	0/0	0/0	11	1	949		TRUE
4	14110261	C	A	A	SNP_LowQualityDepth	0/0	0/0	0/0	0/0	0/1	0/0	0/0	0/0	0/0	0/0	0/0	0/0	11	1	FALSE	TRUE	TRUE
4	14162345	G	T	#N/A	#N/A	#N/A	#N/A	#N/A	#N/A	#N/A	#N/A	#N/A	#N/A	#N/A	#N/A	#N/A	#N/A	0	0	FALSE	TRUE	TRUE
4	14241397	A	G	G	PASS	0/0	0/0	0/0	0/0	0/0	0/0	0/0	0/0	0/1	0/0	0/0	0/0	11	1	950		TRUE
4	14514323	T	G	G	PASS	0/0	0/0	0/1	0/0	0/0	0/0	0/0	0/0	0/0	0/0	0/0	0/0	11	1	951		TRUE
4	15830747	G	T	T	PASS	0/0	0/0	0/0	0/0	0/0	0/0	0/0	0/0	0/1	0/0	0/0	0/0	11	1	952		TRUE
4	16021091	A	G	G	PASS	0/0	0/0	0/0	0/0	0/0	0/0	0/0	0/0	0/0	0/0	0/1	0/0	11	1	953		TRUE
4	16714886	C	T	T	PASS	0/0	0/0	0/0	0/0	0/1	0/0	0/0	0/0	0/0	0/0	0/0	0/0	11	1	954		TRUE
4	16994387	G	T	T	PASS	0/1	0/0	0/0	0/0	0/0	0/0	0/0	0/0	0/0	0/0	0/0	0/0	11	1	955		TRUE
4	17153240	A	T	T	PASS	0/0	0/0	0/0	0/0	0/1	0/0	0/0	0/0	0/0	0/0	0/0	0/0	11	1	956		TRUE
4	17499703	T	C	C,*	PASS	0/0	0/0	0/1	0/0	0/0	0/0	0/0	0/0	0/0	0/2	0/0	0/0	10	0	FALSE	TRUE	TRUE
4	18177691	A	T	T	PASS	0/0	0/0	0/0	0/1	0/0	0/0	0/0	0/0	0/0	0/0	0/0	0/0	11	1	957		TRUE
4	18177692	C	T	T	PASS	0/0	0/0	0/0	0/1	0/0	0/0	0/0	0/0	0/0	0/0	0/0	0/0	11	1	958		TRUE
4	18316351	T	A	A	PASS	0/0	0/0	0/0	0/0	0/1	0/0	0/0	0/0	0/0	0/0	0/0	0/0	11	1	959		TRUE
4	18338737	G	T	T	PASS	0/0	0/0	0/0	0/0	0/0	0/0	0/0	0/0	0/0	0/0	0/1	0/0	11	1	960		TRUE
4	18375069	G	T	T	PASS	0/0	0/0	0/1	0/0	0/0	0/0	0/0	0/0	0/0	0/0	0/0	0/0	11	1	961		TRUE
4	18931241	G	A	A	PASS	0/0	0/1	0/0	0/0	0/0	0/0	0/0	0/0	0/0	0/0	0/0	0/0	11	1	962		TRUE
4	19027065	A	C	C	PASS	0/0	0/0	0/0	0/0	0/0	0/0	0/0	0/0	0/0	0/0	0/1	0/0	11	1	963		TRUE
4	19044209	T	G	G	PASS	0/0	0/0	0/0	0/0	0/1	0/0	0/0	0/0	0/0	0/0	0/0	0/0	11	1	964		TRUE
4	19102098	G	A	A	PASS	0/1	0/0	0/0	0/0	0/0	0/0	0/0	0/0	0/0	0/0	0/0	0/0	11	1	965		TRUE
4	19234682	C	G	G	PASS	0/1	0/0	0/0	0/0	0/0	0/0	0/0	0/0	0/0	0/0	0/0	0/0	11	1	966		TRUE
4	19384075	A	G	G	PASS	0/0	0/0	0/0	0/0	0/0	0/0	0/0	0/1	0/0	0/0	0/0	0/0	11	1	967		TRUE
4	20541711	A	T	T	PASS	0/0	0/0	0/1	0/0	0/0	0/0	0/0	0/0	0/0	0/0	0/0	0/0	11	1	968		TRUE
4	20680678	A	T	T	PASS	0/0	0/0	0/0	0/1	0/0	0/0	0/0	0/0	0/0	0/0	0/0	0/0	11	1	969		TRUE
4	21151208	C	A	A	PASS	0/1	0/0	0/0	0/0	0/0	0/0	0/0	0/0	0/0	0/0	0/0	0/0	11	1	970		TRUE
4	22545503	C	T	T	PASS	0/0	0/0	0/1	0/0	0/0	0/0	0/0	0/0	0/0	0/0	0/0	0/0	11	1	971		TRUE
4	22897370	C	A	A	PASS	0/0	0/1	0/0	0/0	0/0	0/0	0/0	0/0	0/0	0/0	0/0	0/0	11	1	972		TRUE
4	22954381	A	G	G	PASS	0/0	0/0	0/0	0/0	0/1	0/0	0/0	0/0	0/0	0/0	0/0	0/0	11	1	973		TRUE
4	22971428	G	A	A	PASS	0/1	0/0	0/0	0/0	0/0	0/0	0/0	0/0	0/0	0/0	0/0	0/0	11	1	974		TRUE
4	23158634	C	A	A	PASS	0/0	0/1	0/0	0/0	0/0	0/0	0/0	0/0	0/0	0/0	0/0	0/0	11	1	975		TRUE
4	23886467	G	T	T	PASS	0/0	0/0	0/0	0/0	0/1	0/0	0/0	0/0	0/0	0/0	0/0	0/0	11	1	976		TRUE
4	24396122	C	A	A	PASS	0/1	0/0	0/0	0/0	0/0	0/0	0/0	0/0	0/0	0/0	0/0	0/0	11	1	977		TRUE
4	25189806	C	A	A	PASS	0/0	0/0	0/1	0/0	0/0	0/0	0/0	0/0	0/0	0/0	0/0	0/0	11	1	978		TRUE
4	26072078	A	C	C	PASS	0/0	0/0	0/0	0/0	0/0	0/0	0/0	0/1	0/0	0/0	0/0	0/0	11	1	979		TRUE
4	26159011	C	T	T	PASS	0/0	0/0	0/0	0/1	0/0	0/0	0/0	0/0	0/0	0/0	0/0	0/0	11	1	980		TRUE
4	26998151	G	T	T	PASS	0/0	0/0	0/0	0/0	0/0	0/0	0/0	0/0	0/0	0/0	0/0	0/1	11	1	981		TRUE
4	27625370	C	A	A	PASS	0/0	0/0	0/0	0/0	0/0	0/0	0/0	0/1	0/0	0/0	0/0	0/0	11	1	982		TRUE
4	28082931	C	T	T	PASS	0/1	0/0	0/0	0/0	0/0	0/0	0/0	0/0	0/0	0/0	0/0	0/0	11	1	983		TRUE
4	28290450	G	T	T	PASS	0/0	0/0	0/0	0/0	0/0	0/0	0/0	0/0	0/0	0/0	0/0	0/1	11	1	984		TRUE
4	28847507	C	G	G	PASS	0/0	0/0	0/1	0/0	0/0	0/0	0/0	0/0	0/0	0/0	0/0	0/0	11	1	985		TRUE
4	31138272	G	A	A	PASS	0/1	0/0	0/0	0/0	0/0	0/0	0/0	0/0	0/0	0/0	0/0	0/0	11	1	986		TRUE
4	35438830	A	C	C	PASS	0/0	0/0	0/0	0/0	0/0	0/0	0/0	0/0	0/0	0/0	0/1	0/0	11	1	987		TRUE
4	35489474	C	A	A	PASS	0/0	0/0	0/0	0/0	0/0	0/1	0/0	0/0	0/0	0/0	0/0	0/0	11	1	988		TRUE
4	35677045	C	A	A	PASS	0/0	0/0	0/0	0/0	0/0	0/0	0/0	0/0	0/0	0/0	0/0	0/1	11	1	989		TRUE
4	35866263	T	G	G	PASS	0/0	0/0	0/0	0/0	0/0	0/0	0/0	0/1	0/0	0/0	0/0	0/0	11	1	990		TRUE
4	35876750	C	T	T	PASS	0/0	0/0	0/1	0/0	0/0	0/0	0/0	0/0	0/0	0/0	0/0	0/0	11	1	991		TRUE
4	36003351	T	A	A	PASS	0/0	0/0	0/1	0/0	0/0	0/0	0/0	0/0	0/0	0/0	0/0	0/0	11	1	992		TRUE
4	36592106	G	T	T	PASS	0/0	0/0	0/0	0/0	0/0	0/0	0/0	0/0	0/1	0/0	0/0	0/0	11	1	993		TRUE
4	36721851	C	T	T	PASS	0/0	0/0	0/0	0/0	0/0	0/0	0/0	0/0	0/1	0/0	0/0	0/0	11	1	994		TRUE
4	37241072	G	T	T	PASS	0/0	0/0	0/0	0/0	0/1	0/0	0/0	0/0	0/0	0/0	0/0	0/0	11	1	995		TRUE
4	37336752	T	G	G	PASS	0/1	0/0	0/0	0/0	0/0	0/0	0/0	0/0	0/0	0/0	0/0	0/0	11	1	996		TRUE
4	37540795	C	A	A	PASS	0/0	0/0	0/0	0/1	0/0	0/0	0/0	0/0	0/0	0/0	0/0	0/0	11	1	997		TRUE
4	37665305	G	T	T	PASS	0/0	0/0	0/1	0/0	0/0	0/0	0/0	0/0	0/0	0/0	0/0	0/0	11	1	998		TRUE
4	37790424	G	A	A	PASS	0/0	0/0	0/1	0/0	0/0	0/0	0/0	0/0	0/0	0/0	0/0	0/0	11	1	999		TRUE
4	37849797	G	A	A	PASS	0/1	0/0	0/0	0/0	0/0	0/0	0/0	0/0	0/0	0/0	0/0	0/0	11	1	1000		TRUE
4	37902535	G	C	C	PASS	0/0	0/0	0/0	0/0	0/0	0/0	0/0	0/0	0/0	0/0	0/0	0/1	11	1	1001		TRUE
4	37948438	G	T	T	PASS	0/0	0/0	0/0	0/0	0/0	0/0	0/0	0/0	0/0	0/0	0/0	0/1	11	1	1002		TRUE
4	37950023	G	T	T	PASS	0/0	0/0	0/1	0/0	0/0	0/0	0/0	0/0	0/0	0/0	0/0	0/0	11	1	1003		TRUE
4	38218551	G	A	A	PASS	0/0	0/0	0/0	0/0	0/1	0/0	0/0	0/0	0/0	0/0	0/0	0/0	11	1	1004		TRUE
4	38282542	A	G	G	PASS	0/0	0/0	0/0	0/0	0/0	0/0	0/0	0/0	0/1	0/0	0/0	0/0	11	1	1005		TRUE
4	38314556	C	A	A	SNP_LowQualityDepth	0/0	0/0	0/0	0/0	0/0	0/0	0/0	0/0	0/0	0/0	0/0	0/1	11	1	FALSE	TRUE	TRUE
4	38375634	G	T	T	PASS	0/0	0/0	0/0	0/0	0/0	0/0	0/0	0/0	0/1	0/0	0/0	0/0	11	1	1006		TRUE
4	38454021	C	T	T	PASS	0/0	0/0	0/1	0/0	0/0	0/0	0/0	0/0	0/0	0/0	0/0	0/0	11	1	1007		TRUE
4	38528843	G	T	T	PASS	0/0	0/0	0/0	0/0	0/0	0/0	0/0	0/0	0/0	0/0	0/0	0/1	11	1	1008		TRUE
4	38534531	C	A	A	PASS	0/0	0/0	0/0	0/0	0/0	0/0	0/0	0/1	0/0	0/0	0/0	0/0	11	1	1009		TRUE
4	38895546	G	A	A	PASS	0/0	0/0	0/1	0/0	0/0	0/0	0/0	0/0	0/0	0/0	0/0	0/0	11	1	1010		TRUE
4	38990704	G	T	T	PASS	0/0	0/0	0/0	0/0	0/1	0/0	0/0	0/0	0/0	0/0	0/0	0/0	11	1	1011		TRUE
4	39050982	G	A	A	PASS	0/0	0/1	0/0	0/0	0/0	0/0	0/0	0/0	0/0	0/0	0/0	0/0	11	1	1012		TRUE
4	39336415	C	A	A	PASS	0/0	0/0	0/0	0/0	0/1	0/0	0/0	0/0	0/0	0/0	0/0	0/0	11	1	1013		TRUE
4	39336416	A	C	C	PASS	0/0	0/0	0/0	0/0	0/1	0/0	0/0	0/0	0/0	0/0	0/0	0/0	11	1	1014		TRUE
4	39661267	G	T	T	PASS	0/0	0/0	0/0	0/0	0/0	0/0	0/0	0/0	0/0	0/0	0/1	0/0	11	1	1015		TRUE
4	39674297	G	T	T	PASS	0/0	0/0	0/0	0/0	0/0	0/0	0/0	0/1	0/0	0/0	0/0	0/0	11	1	1016		TRUE
4	42742423	T	C	C	PASS	0/0	0/0	0/0	0/0	0/0	0/0	0/0	0/1	0/0	0/0	0/0	0/0	11	1	1017		TRUE
4	42742425	C	T	T	PASS	0/0	0/0	0/0	0/0	0/0	0/0	0/0	0/1	0/0	0/0	0/0	0/0	11	1	1018		TRUE
4	44010925	T	A	A,*	PASS	0/0	0/0	0/0	0/0	0/1	0/0	0/0	0/0	0/0	0/2	0/0	0/0	10	0	FALSE	TRUE	TRUE
4	44578457	A	G	G	PASS	0/0	0/0	0/0	0/0	0/0	0/0	0/0	0/1	0/0	0/0	0/0	0/0	11	1	1019		TRUE
4	46653411	G	C	C	PASS	0/1	0/0	0/0	0/0	0/0	0/0	0/0	0/0	0/0	0/0	0/0	0/0	11	1	1020		TRUE
4	46795960	G	T	T	PASS	0/0	0/0	0/0	0/0	0/1	0/0	0/0	0/0	0/0	0/0	0/0	0/0	11	1	1021		TRUE
4	47915471	C	A	A	PASS	0/0	0/0	0/0	0/1	0/0	0/0	0/0	0/0	0/0	0/0	0/0	0/0	11	1	1022		TRUE
4	48868828	C	A	A	PASS	0/0	0/0	0/1	0/0	0/0	0/0	0/0	0/0	0/0	0/0	0/0	0/0	11	1	1023		TRUE
4	50018005	A	G	G	PASS	0/0	0/1	0/0	0/0	0/0	0/0	0/0	0/0	0/0	0/0	0/0	0/0	11	1	1024		TRUE
4	50951520	C	A	A	PASS	0/0	0/0	0/1	0/0	0/0	0/0	0/0	0/0	0/0	0/0	0/0	0/0	11	1	1025		TRUE
4	50964714	G	T	T	PASS	0/0	0/0	0/0	0/0	0/0	0/0	0/0	0/1	0/0	0/0	0/0	0/0	11	1	1026		TRUE
4	51089669	G	C	C	PASS	0/0	0/0	0/0	0/0	0/0	0/0	0/1	0/0	0/0	0/0	0/0	0/0	11	1	1027		TRUE
4	51563903	C	T	T	PASS	0/1	0/0	0/0	0/0	0/0	0/0	0/0	0/0	0/0	0/0	0/0	0/0	11	1	1028		TRUE
4	51628993	T	A	A	PASS	0/0	0/0	0/0	0/0	0/1	0/0	0/0	0/0	0/0	0/0	0/0	0/0	11	1	1029		TRUE
4	51697433	T	C	#N/A	#N/A	#N/A	#N/A	#N/A	#N/A	#N/A	#N/A	#N/A	#N/A	#N/A	#N/A	#N/A	#N/A	0	0	FALSE	FALSE	FALSE
4	52042670	A	G	G	PASS	0/1	0/0	0/0	0/0	0/0	0/0	0/0	0/0	0/0	0/0	0/0	0/0	11	1	1030		TRUE
4	52268473	A	G	G	PASS	0/0	0/0	0/0	0/0	0/0	0/0	0/0	0/0	0/0	0/0	0/1	0/0	11	1	1031		TRUE
4	52882853	C	A	A	PASS	0/0	0/0	0/0	0/0	0/1	0/0	0/0	0/0	0/0	0/0	0/0	0/0	11	1	1032		TRUE
4	53603873	G	T	T	PASS	0/0	0/0	0/0	0/0	0/0	0/0	0/0	0/1	0/0	0/0	0/0	0/0	11	1	1033		TRUE
4	53902895	C	T	T	PASS	0/0	0/0	0/0	0/0	0/0	0/0	0/0	0/0	0/0	0/0	0/1	0/0	11	1	1034		TRUE
4	54015923	C	T	T	PASS	0/0	0/0	0/0	0/1	0/0	0/0	0/0	0/0	0/0	0/0	0/0	0/0	11	1	1035		TRUE
4	55348188	G	T	T	PASS	0/0	0/0	0/1	0/0	0/0	0/0	0/0	0/0	0/0	0/0	0/0	0/0	11	1	1036		TRUE
4	56007784	C	T	T	PASS	0/0	0/0	0/1	0/0	0/0	0/0	0/0	0/0	0/0	0/0	0/0	0/0	11	1	1037		TRUE
4	56328206	A	T	T	PASS	0/1	0/0	0/0	0/0	0/0	0/0	0/0	0/0	0/0	0/0	0/0	0/0	11	1	1038		TRUE
4	56508716	T	G	G	PASS	0/0	0/0	0/0	0/0	0/0	0/0	0/0	0/0	0/0	0/0	0/1	0/0	11	1	1039		TRUE
4	57803879	T	A	A	PASS	0/1	0/0	0/0	0/0	0/0	0/0	0/0	0/0	0/0	0/0	0/0	0/0	11	1	1040		TRUE
4	57935121	C	A	A	PASS	0/0	0/0	0/0	0/0	0/0	0/0	0/0	0/1	0/0	0/0	0/0	0/0	11	1	1041		TRUE
4	58376375	C	T	T	PASS	0/0	0/0	0/0	0/0	0/0	0/0	0/0	0/1	0/0	0/0	0/0	0/0	11	1	1042		TRUE
4	58621942	C	A	A	PASS	0/0	0/0	0/0	0/0	0/1	0/0	0/0	0/0	0/0	0/0	0/0	0/0	11	1	1043		TRUE
4	59709831	C	T	T	PASS	0/0	0/0	0/0	0/1	0/0	0/0	0/0	0/0	0/0	0/0	0/0	0/0	11	1	1044		TRUE
4	59951516	A	C	C	PASS	0/1	0/0	0/0	0/0	0/0	0/0	0/0	0/0	0/0	0/0	0/0	0/0	11	1	1045		TRUE
4	62238400	A	T	T	PASS	0/0	0/0	0/0	0/1	0/0	0/0	0/0	0/0	0/0	0/0	0/0	0/0	11	1	1046		TRUE
4	64286295	C	G	G	PASS	0/0	0/0	0/0	0/1	0/0	0/0	0/0	0/0	0/0	0/0	0/0	0/0	11	1	1047		TRUE
4	64486717	T	C	C	PASS	0/0	0/0	0/0	0/0	0/0	0/0	0/1	0/0	0/0	0/0	0/0	0/0	11	1	1048		TRUE
4	64628621	T	A	A	PASS	0/0	0/1	0/0	0/0	0/0	0/0	0/0	0/0	0/0	0/0	0/0	0/0	11	1	1049		TRUE
4	64841886	A	C	C	PASS	0/0	0/0	0/0	0/0	0/0	0/0	0/1	0/0	0/0	0/0	0/0	0/0	11	1	1050		TRUE
4	65397564	C	T	T	PASS	0/0	0/0	0/0	0/0	0/1	0/0	0/0	0/0	0/0	0/0	0/0	0/0	11	1	1051		TRUE
4	65688351	C	A	A	PASS	0/0	0/0	0/0	0/0	0/0	0/0	0/0	0/1	0/0	0/0	0/0	0/0	11	1	1052		TRUE
4	65741226	A	G	G	PASS	0/0	0/0	0/0	0/1	0/0	0/0	0/0	0/0	0/0	0/0	0/0	0/0	11	1	1053		TRUE
4	65895684	A	C	C	PASS	0/1	0/0	0/0	0/0	0/0	0/0	0/0	0/0	0/0	0/0	0/0	0/0	11	1	1054		TRUE
4	65947964	C	A	A	PASS	0/0	0/0	0/1	0/0	0/0	0/0	0/0	0/0	0/0	0/0	0/0	0/0	11	1	1055		TRUE
4	66208497	C	A	A	PASS	0/0	0/0	0/0	0/0	0/0	0/0	0/0	0/0	0/1	0/0	0/0	0/0	11	1	1056		TRUE
4	66256149	A	C	C	PASS	0/0	0/0	0/0	0/0	0/0	0/0	0/0	0/1	0/0	0/0	0/0	0/0	11	1	1057		TRUE
4	66811346	A	G	G	PASS	0/0	0/0	0/0	0/0	0/1	0/0	0/0	0/0	0/0	0/0	0/0	0/0	11	1	1058		TRUE
4	66937486	A	C	C	PASS	0/0	0/0	0/1	0/0	0/0	0/0	0/0	0/0	0/0	0/0	0/0	0/0	11	1	1059		TRUE
4	66945580	G	A	A	PASS	0/0	0/0	0/0	0/0	0/1	0/0	0/0	0/0	0/0	0/0	0/0	0/0	11	1	1060		TRUE
4	66959798	A	C	C	PASS	0/0	0/0	0/0	0/1	0/0	0/0	0/0	0/0	0/0	0/0	0/0	0/0	11	1	1061		TRUE
4	67065849	G	T	T	PASS	0/0	0/0	0/0	0/0	0/0	0/0	0/1	0/0	0/0	0/0	0/0	0/0	11	1	1062		TRUE
4	67092199	G	C	C	PASS	0/0	0/0	0/0	0/0	0/0	0/0	0/1	0/0	0/0	0/0	0/0	0/0	11	1	1063		TRUE
4	67113574	C	A	A	PASS	0/0	0/0	0/0	0/1	0/0	0/0	0/0	0/0	0/0	0/0	0/0	0/0	11	1	1064		TRUE
4	67790733	G	T	T	PASS	0/0	0/0	0/1	0/0	0/0	0/0	0/0	0/0	0/0	0/0	0/0	0/0	11	1	1065		TRUE
4	69547201	A	G	G	PASS	0/0	0/0	0/0	0/0	0/0	0/1	0/0	0/0	0/0	0/0	0/0	0/0	11	1	1066		TRUE
4	70456776	C	T	T	PASS	0/0	0/0	0/0	0/0	0/1	0/0	0/0	0/0	0/0	0/0	0/0	0/0	11	1	1067		TRUE
4	70789352	A	C	C	PASS	0/0	0/0	0/0	0/0	0/0	0/0	0/0	0/1	0/0	0/0	0/0	0/0	11	1	1068		TRUE
4	71044967	C	A	A	PASS	0/1	0/0	0/0	0/0	0/0	0/0	0/0	0/0	0/0	0/0	0/0	0/0	11	1	1069		TRUE
4	71310471	C	T	T	PASS	0/0	0/0	0/0	0/0	0/0	0/0	0/0	0/0	0/0	0/0	0/0	0/1	11	1	1070		TRUE
4	71544949	G	A	A	PASS	0/0	0/0	0/0	0/0	0/0	0/0	0/0	0/1	0/0	0/0	0/0	0/0	11	1	1071		TRUE
4	72042849	C	A	A	PASS	0/0	0/0	0/0	0/0	0/1	0/0	0/0	0/0	0/0	0/0	0/0	0/0	11	1	1072		TRUE
4	72412877	A	T	T	PASS	0/0	0/0	0/0	0/0	0/0	0/0	0/0	0/1	0/0	0/0	0/0	0/0	11	1	1073		TRUE
4	73074973	G	T	T	PASS	0/1	0/0	0/0	0/0	0/0	0/0	0/0	0/0	0/0	0/0	0/0	0/0	11	1	1074		TRUE
4	73566207	C	A	A	PASS	0/0	0/0	0/1	0/0	0/0	0/0	0/0	0/0	0/0	0/0	0/0	0/0	11	1	1075		TRUE
4	73575423	T	G	G	PASS	0/0	0/0	0/1	0/0	0/0	0/0	0/0	0/0	0/0	0/0	0/0	0/0	11	1	1076		TRUE
4	73736182	C	T	T	SNP_LowQualityDepth	0/0	0/0	0/0	0/0	0/0	0/0	0/0	0/1	0/0	0/0	0/0	0/0	11	1	FALSE	TRUE	TRUE
4	73993349	C	A	A	PASS	0/0	0/0	0/1	0/0	0/0	0/0	0/0	0/0	0/0	0/0	0/0	0/0	11	1	1077		TRUE
4	74022186	A	G	G	PASS	0/0	0/0	0/0	0/0	0/0	0/0	0/1	0/0	0/0	0/0	0/0	0/0	11	1	1078		TRUE
4	74462672	A	T	T	PASS	0/0	0/0	0/0	0/1	0/0	0/0	0/0	0/0	0/0	0/0	0/0	0/0	11	1	1079		TRUE
4	74591090	C	T	T	PASS	0/0	0/0	0/0	0/0	0/0	0/0	0/1	0/0	0/0	0/0	0/0	0/0	11	1	1080		TRUE
4	75266436	T	G	G	PASS	0/1	0/0	0/0	0/0	0/0	0/0	0/0	0/0	0/0	0/0	0/0	0/0	11	1	1081		TRUE
4	75502842	A	C	C	PASS	0/0	0/0	0/0	0/0	0/0	0/0	0/0	0/0	0/0	0/0	0/0	0/1	11	1	1082		TRUE
4	76082039	A	G	G	PASS	0/0	0/0	0/1	0/0	0/0	0/0	0/0	0/0	0/0	0/0	0/0	0/0	11	1	1083		TRUE
4	76863643	G	C	C	PASS	0/1	0/0	0/0	0/0	0/0	0/0	0/0	0/0	0/0	0/0	0/0	0/0	11	1	1084		TRUE
4	77070316	A	T	T	PASS	0/0	0/0	0/1	0/0	0/0	0/0	0/0	0/0	0/0	0/0	0/0	0/0	11	1	1085		TRUE
4	77640994	T	C	C	PASS	0/0	0/1	0/0	0/0	0/0	0/0	0/0	0/0	0/0	0/0	0/0	0/0	11	1	1086		TRUE
4	78429168	C	A	A	PASS	0/0	0/1	0/0	0/0	0/0	0/0	0/0	0/0	0/0	0/0	0/0	0/0	11	1	1087		TRUE
4	78550153	T	C	C	PASS	0/0	0/1	0/0	0/0	0/0	0/0	0/0	0/0	0/0	0/0	0/0	0/0	11	1	1088		TRUE
4	79149858	T	A	A	PASS	0/0	0/0	0/1	0/0	0/0	0/0	0/0	0/0	0/0	0/0	0/0	0/0	11	1	1089		TRUE
4	79676889	G	C	#N/A	#N/A	#N/A	#N/A	#N/A	#N/A	#N/A	#N/A	#N/A	#N/A	#N/A	#N/A	#N/A	#N/A	0	0	FALSE	TRUE	TRUE
4	79711406	A	G	G	PASS	0/0	0/0	0/0	0/0	0/0	0/0	0/0	0/1	0/0	0/0	0/0	0/0	11	1	1090		TRUE
4	79854358	C	A	A	PASS	0/1	0/0	0/0	0/0	0/0	0/0	0/0	0/0	0/0	0/0	0/0	0/0	11	1	1091		TRUE
4	79865933	C	T	T	PASS	0/0	0/0	0/0	0/0	0/0	0/1	0/0	0/0	0/0	0/0	0/0	0/0	11	1	1092		TRUE
4	80083186	A	T	T	PASS	0/0	0/1	0/0	0/0	0/0	0/0	0/0	0/0	0/0	0/0	0/0	0/0	11	1	1093		TRUE
4	80086079	A	T	T	PASS	0/0	0/0	0/0	0/1	0/0	0/0	0/0	0/0	0/0	0/0	0/0	0/0	11	1	1094		TRUE
4	81957620	A	G	G	PASS	0/1	0/0	0/0	0/0	0/0	0/0	0/0	0/0	0/0	0/0	0/0	0/0	11	1	1095		TRUE
4	82030759	C	A	A	PASS	0/1	0/0	0/0	0/0	0/0	0/0	0/0	0/0	0/0	0/0	0/0	0/0	11	1	1096		TRUE
4	84796153	A	T	T	PASS	0/0	0/0	0/1	0/0	0/0	0/0	0/0	0/0	0/0	0/0	0/0	0/0	11	1	1097		TRUE
4	84912370	T	G	G	PASS	0/1	0/0	0/0	0/0	0/0	0/0	0/0	0/0	0/0	0/0	0/0	0/0	11	1	1098		TRUE
4	85607099	G	T	T	PASS	0/0	0/0	0/0	0/0	0/0	0/0	0/0	0/1	0/0	0/0	0/0	0/0	11	1	1099		TRUE
4	87258631	C	T	T	PASS	0/0	0/0	0/0	0/0	0/0	0/0	0/0	0/0	0/0	0/0	0/1	0/0	11	1	1100		TRUE
4	88883262	C	T	T	PASS	0/0	0/0	0/1	0/0	0/0	0/0	0/0	0/0	0/0	0/0	0/0	0/0	11	1	1101		TRUE
4	90251974	G	T	T	PASS	0/1	0/0	0/0	0/0	0/0	0/0	0/0	0/0	0/0	0/0	0/0	0/0	11	1	1102		TRUE
4	90338015	G	T	T	PASS	0/0	0/0	0/0	0/0	0/0	0/0	0/0	0/1	0/0	0/0	0/0	0/0	11	1	1103		TRUE
4	90455902	T	G	G	PASS	0/0	0/0	0/0	0/0	0/0	0/0	0/0	0/0	0/1	0/0	0/0	0/0	11	1	1104		TRUE
4	90996496	A	C	C	SNP_LowQualityDepth	0/0	0/0	0/0	0/0	0/0	0/0	0/0	0/0	0/0	0/0	0/0	0/1	11	1	FALSE	TRUE	TRUE
4	91018841	C	A	A	PASS	0/0	0/0	0/0	0/0	0/0	0/0	0/0	0/0	0/0	0/0	0/0	0/1	11	1	1105		TRUE
4	91131090	C	A	A	PASS	0/0	0/0	0/0	0/0	0/0	0/0	0/0	0/1	0/0	0/0	0/0	0/0	11	1	1106		TRUE
4	92248655	C	T	T	PASS	0/0	0/0	0/0	0/1	0/0	0/0	0/0	0/0	0/0	0/0	0/0	0/0	11	1	1107		TRUE
4	92450672	T	C	C	PASS	0/0	0/0	0/0	0/0	0/0	0/0	0/0	0/0	0/0	0/0	0/0	0/1	11	1	1108		TRUE
4	92520126	C	G	G	PASS	0/0	0/0	0/1	0/0	0/0	0/0	0/0	0/0	0/0	0/0	0/0	0/0	11	1	1109		TRUE
4	92714373	A	G	G	PASS	0/0	0/0	0/0	0/0	0/0	0/0	0/0	0/1	0/0	0/0	0/0	0/0	11	1	1110		TRUE
4	93160742	C	A	A	PASS	0/0	0/0	0/0	0/0	0/1	0/0	0/0	0/0	0/0	0/0	0/0	0/0	11	1	1111		TRUE
4	94786621	G	T	T	PASS	0/0	0/0	0/0	0/0	0/1	0/0	0/0	0/0	0/0	0/0	0/0	0/0	11	1	1112		TRUE
4	96254669	G	T	T	PASS	0/0	0/0	0/1	0/0	0/0	0/0	0/0	0/0	0/0	0/0	0/0	0/0	11	1	1113		TRUE
4	96639305	G	A	A	PASS	0/0	0/0	0/0	0/0	0/0	0/0	0/0	0/1	0/0	0/0	0/0	0/0	11	1	1114		TRUE
4	97429379	T	C	C	PASS	0/0	0/1	0/0	0/0	0/0	0/0	0/0	0/0	0/0	0/0	0/0	0/0	11	1	1115		TRUE
4	101446225	C	T	T	PASS	0/0	0/0	0/1	0/0	0/0	0/0	0/0	0/0	0/0	0/0	0/0	0/0	11	1	1116		TRUE
4	101625099	C	T	T	PASS	0/0	0/0	0/0	0/1	0/0	0/0	0/0	0/0	0/0	0/0	0/0	0/0	11	1	1117		TRUE
4	101889499	G	T	T	PASS	0/0	0/0	0/0	0/0	0/0	0/0	0/0	0/0	0/0	0/0	0/0	0/1	11	1	1118		TRUE
4	101969239	G	A	A	PASS	0/0	0/0	0/1	0/0	0/0	0/0	0/0	0/0	0/0	0/0	0/0	0/0	11	1	1119		TRUE
4	102144643	T	C	C	PASS	0/0	0/1	0/0	0/0	0/0	0/0	0/0	0/0	0/0	0/0	0/0	0/0	11	1	1120		TRUE
4	104929518	G	A	A	PASS	0/0	0/0	0/0	0/0	0/0	0/0	0/1	0/0	0/0	0/0	0/0	0/0	11	1	1121		TRUE
4	105645351	C	A	A	PASS	0/0	0/0	0/1	0/0	0/0	0/0	0/0	0/0	0/0	0/0	0/0	0/0	11	1	1122		TRUE
4	105729931	T	G	G	PASS	0/0	0/0	0/0	0/1	0/0	0/0	0/0	0/0	0/0	0/0	0/0	0/0	11	1	1123		TRUE
4	106542274	G	A	A	PASS	0/0	0/0	0/0	0/0	0/0	0/0	0/1	0/0	0/0	0/0	0/0	0/0	11	1	1124		TRUE
4	107249811	C	T	T	PASS	0/0	0/0	0/0	0/0	0/0	0/1	0/0	0/0	0/0	0/0	0/0	0/0	11	1	1125		TRUE
4	107522961	C	A	A	PASS	0/0	0/0	0/0	0/0	0/0	0/0	0/0	0/0	0/0	0/0	0/1	0/0	11	1	1126		TRUE
4	108068241	A	G	G	PASS	0/0	0/0	0/0	0/1	0/0	0/0	0/0	0/0	0/0	0/0	0/0	0/0	11	1	1127		TRUE
4	109974998	C	A	A	PASS	0/0	0/0	0/0	0/0	0/1	0/0	0/0	0/0	0/0	0/0	0/0	0/0	11	1	1128		TRUE
4	110295646	T	A	A	PASS	0/0	0/0	0/1	0/0	0/0	0/0	0/0	0/0	0/0	0/0	0/0	0/0	11	1	1129		TRUE
4	110357361	T	G	G	PASS	0/0	0/0	0/1	0/0	0/0	0/0	0/0	0/0	0/0	0/0	0/0	0/0	11	1	1130		TRUE
4	110635703	G	T	T	PASS	0/0	0/0	0/0	0/0	0/1	0/0	0/0	0/0	0/0	0/0	0/0	0/0	11	1	1131		TRUE
4	110786325	T	A	A	PASS	0/0	0/0	0/0	0/0	0/1	0/0	0/0	0/0	0/0	0/0	0/0	0/0	11	1	1132		TRUE
4	111004045	T	G	T,GTG	PASS	0/0	0/1	0/1	0/2	0/1	0/0	0/1	0/1	0/0	0/0	0/0	0/0	6	0	FALSE	?	FALSE
4	111136031	G	T	T	PASS	0/0	0/0	0/1	0/0	0/0	0/0	0/0	0/0	0/0	0/0	0/0	0/0	11	1	1133		TRUE
4	111657446	G	A	A	PASS	0/0	0/0	0/0	0/0	0/1	0/0	0/0	0/0	0/0	0/0	0/0	0/0	11	1	1134		TRUE
4	111666004	G	A	A	PASS	0/0	0/0	0/0	0/1	0/0	0/0	0/0	0/0	0/0	0/0	0/0	0/0	11	1	1135		TRUE
4	114681441	C	T	T	PASS	0/0	0/0	0/0	0/1	0/0	0/0	0/0	0/0	0/0	0/0	0/0	0/0	11	1	1136		TRUE
4	117149203	G	T	T	PASS	0/0	0/0	0/1	0/0	0/0	0/0	0/0	0/0	0/0	0/0	0/0	0/0	11	1	1137		TRUE
4	117180620	G	T	T	PASS	0/0	0/0	0/0	0/0	0/1	0/0	0/0	0/0	0/0	0/0	0/0	0/0	11	1	1138		TRUE
4	118869990	C	A	A	PASS	0/0	0/0	0/0	0/0	0/0	0/1	0/0	0/0	0/0	0/0	0/0	0/0	11	1	1139		TRUE
4	121571885	G	T	T	SNP_LowQualityDepth	0/0	0/0	0/0	0/0	0/0	0/1	0/0	0/0	0/0	0/0	0/0	0/0	11	1	FALSE	TRUE	TRUE
4	124004894	C	A	A	PASS	0/0	0/1	0/0	0/0	0/0	0/0	0/0	0/0	0/0	0/0	0/0	0/0	11	1	1140		TRUE
4	124538699	G	T	T	PASS	0/0	0/0	0/0	0/0	0/1	0/0	0/0	0/0	0/0	0/0	0/0	0/0	11	1	1141		TRUE
4	125738262	G	T	T	PASS	0/0	0/0	0/0	0/0	0/0	0/0	0/0	0/0	0/0	0/0	0/1	0/0	11	1	1142		TRUE
4	126382632	G	T	T	PASS	0/0	0/0	0/0	0/0	0/0	0/0	0/0	0/1	0/0	0/0	0/0	0/0	11	1	1143		TRUE
4	127227833	A	C	C	PASS	0/0	0/0	0/0	0/0	0/0	0/0	0/1	0/0	0/0	0/0	0/0	0/0	11	1	1144		TRUE
4	127636263	C	G	G	PASS	0/0	0/1	0/0	0/0	0/0	0/0	0/0	0/0	0/0	0/0	0/0	0/0	11	1	1145		TRUE
4	127694188	C	A	A	PASS	0/0	0/0	0/0	0/0	0/0	0/0	0/0	0/0	0/0	0/0	0/1	0/0	11	1	1146		TRUE
4	128427304	C	T	T	PASS	0/0	0/0	0/0	0/1	0/0	0/0	0/0	0/0	0/0	0/0	0/0	0/0	11	1	1147		TRUE
4	129396531	G	T	T	PASS	0/0	0/0	0/1	0/0	0/0	0/0	0/0	0/0	0/0	0/0	0/0	0/0	11	1	1148		TRUE
4	129784880	G	T	T	PASS	0/0	0/0	0/0	0/0	0/0	0/1	0/0	0/0	0/0	0/0	0/0	0/0	11	1	1149		TRUE
4	129888724	C	A	A	PASS	0/1	0/0	0/0	0/0	0/0	0/0	0/0	0/0	0/0	0/0	0/0	0/0	11	1	1150		TRUE
4	130014837	C	T	T	PASS	0/1	0/0	0/0	0/0	0/0	0/0	0/0	0/0	0/0	0/0	0/0	0/0	11	1	1151		TRUE
4	130261021	C	T	T	PASS	0/0	0/0	0/0	0/0	0/1	0/0	0/0	0/0	0/0	0/0	0/0	0/0	11	1	1152		TRUE
4	130560486	G	T	T	PASS	0/0	0/0	0/1	0/0	0/0	0/0	0/0	0/0	0/0	0/0	0/0	0/0	11	1	1153		TRUE
4	131016803	A	T	#N/A	#N/A	#N/A	#N/A	#N/A	#N/A	#N/A	#N/A	#N/A	#N/A	#N/A	#N/A	#N/A	#N/A	0	0	FALSE	TRUE	TRUE
4	131016804	A	G	#N/A	#N/A	#N/A	#N/A	#N/A	#N/A	#N/A	#N/A	#N/A	#N/A	#N/A	#N/A	#N/A	#N/A	0	0	FALSE	TRUE	TRUE
4	131459707	T	A	A	PASS	0/0	0/1	0/0	0/0	0/0	0/0	0/0	0/0	0/0	0/0	0/0	0/0	11	1	1154		TRUE
4	132422366	G	C	C	PASS	0/0	0/0	0/0	0/0	0/0	0/0	0/0	0/1	0/0	0/0	0/0	0/0	11	1	1155		TRUE
4	134778041	G	T	T	PASS	0/1	0/0	0/0	0/0	0/0	0/0	0/0	0/0	0/0	0/0	0/0	0/0	11	1	1156		TRUE
4	135064118	G	T	#N/A	#N/A	#N/A	#N/A	#N/A	#N/A	#N/A	#N/A	#N/A	#N/A	#N/A	#N/A	#N/A	#N/A	0	0	FALSE	FALSE	FALSE
4	135768780	G	A	A	PASS	0/0	0/0	0/0	0/1	0/0	0/0	0/0	0/0	0/0	0/0	0/0	0/0	11	1	1157		TRUE
4	136724989	G	T	T	PASS	0/1	0/0	0/0	0/0	0/0	0/0	0/0	0/0	0/0	0/0	0/0	0/0	11	1	1158		TRUE
4	138367957	G	C	C	PASS	0/0	0/0	0/0	0/0	0/1	0/0	0/0	0/0	0/0	0/0	0/0	0/0	11	1	1159		TRUE
4	138794962	G	A	A	PASS	0/0	0/0	0/0	0/1	0/0	0/0	0/0	0/0	0/0	0/0	0/0	0/0	11	1	1160		TRUE
4	140203667	C	G	G	PASS	0/1	0/0	0/0	0/0	0/0	0/0	0/0	0/0	0/0	0/0	0/0	0/0	11	1	1161		TRUE
4	142102388	G	A	A	PASS	0/0	0/0	0/0	0/0	0/1	0/0	0/0	0/0	0/0	0/0	0/0	0/0	11	1	1162		TRUE
4	142319170	G	A	A	PASS	0/0	0/0	0/1	0/0	0/0	0/0	0/0	0/0	0/0	0/0	0/0	0/0	11	1	1163		TRUE
4	142321162	G	T	T	PASS	0/1	0/0	0/0	0/0	0/0	0/0	0/0	0/0	0/0	0/0	0/0	0/0	11	1	1164		TRUE
4	143315873	C	T	T	PASS	0/0	0/1	0/0	0/0	0/0	0/0	0/0	0/0	0/0	0/0	0/0	0/0	11	1	1165		TRUE
4	143728474	G	T	T	PASS	0/0	0/0	0/0	0/0	0/1	0/0	0/0	0/0	0/0	0/0	0/0	0/0	11	1	1166		TRUE
4	144143180	C	A	A	PASS	0/0	0/0	0/0	0/0	0/0	0/0	0/0	0/1	0/0	0/0	0/0	0/0	11	1	1167		TRUE
4	144209485	A	C	C	PASS	0/0	0/0	0/0	0/0	0/1	0/0	0/0	0/0	0/0	0/0	0/0	0/0	11	1	1168		TRUE
4	145154363	C	A	A	PASS	0/1	0/0	0/0	0/0	0/0	0/0	0/0	0/0	0/0	0/0	0/0	0/0	11	1	1169		TRUE
4	146932861	G	T	T	PASS	0/1	0/0	0/0	0/0	0/0	0/0	0/0	0/0	0/0	0/0	0/0	0/0	11	1	1170		TRUE
4	148546005	G	A	A	PASS	0/0	0/0	0/0	0/0	0/0	0/0	0/1	0/0	0/0	0/0	0/0	0/0	11	1	1171		TRUE
4	149346652	T	G	G	PASS	0/0	0/0	0/1	0/0	0/0	0/0	0/0	0/0	0/0	0/0	0/0	0/0	11	1	1172		TRUE
4	149526684	C	A	A	PASS	0/0	0/0	0/1	0/0	0/0	0/0	0/0	0/0	0/0	0/0	0/0	0/0	11	1	1173		TRUE
4	150456671	G	T	T	PASS	0/1	0/0	0/0	0/0	0/0	0/0	0/0	0/0	0/0	0/0	0/0	0/0	11	1	1174		TRUE
4	151913247	G	T	T	PASS	0/1	0/0	0/0	0/0	0/0	0/0	0/0	0/0	0/0	0/0	0/0	0/0	11	1	1175		TRUE
4	152163182	G	T	T	PASS	0/0	0/0	0/0	0/1	0/0	0/0	0/0	0/0	0/0	0/0	0/0	0/0	11	1	1176		TRUE
4	153470068	C	T	T	PASS	0/0	0/0	0/0	0/0	0/0	0/1	0/0	0/0	0/0	0/0	0/0	0/0	11	1	1177		TRUE
4	153596683	C	T	T	PASS	0/0	0/0	0/0	0/0	0/0	0/0	0/0	0/0	0/1	0/0	0/0	0/0	11	1	1178		TRUE
4	154177055	G	T	T	PASS	0/1	0/0	0/0	0/0	0/0	0/0	0/0	0/0	0/0	0/0	0/0	0/0	11	1	1179		TRUE
4	156020778	C	T	T	PASS	0/0	0/0	0/1	0/0	0/0	0/0	0/0	0/0	0/0	0/0	0/0	0/0	11	1	1180		TRUE
5	3714072	G	A	A	PASS	0/1	0/0	0/0	0/0	0/0	0/0	0/0	0/0	0/0	0/0	0/0	0/0	11	1	1181		TRUE
5	4020545	C	T	T	PASS	0/0	0/0	0/0	0/0	0/0	0/0	0/0	0/1	0/0	0/0	0/0	0/0	11	1	1182		TRUE
5	4021830	G	A	A	PASS	0/0	0/0	0/0	0/1	0/0	0/0	0/0	0/0	0/0	0/0	0/0	0/0	11	1	1183		TRUE
5	4316661	C	T	T	PASS	0/1	0/0	0/0	0/0	0/0	0/0	0/0	0/0	0/0	0/0	0/0	0/0	11	1	1184		TRUE
5	4379172	C	A	A	PASS	0/0	0/0	0/0	0/0	0/0	0/0	0/0	0/1	0/0	0/0	0/0	0/0	11	1	1185		TRUE
5	4723012	C	A	A	PASS	0/0	0/0	0/1	0/0	0/0	0/0	0/0	0/0	0/0	0/0	0/0	0/0	11	1	1186		TRUE
5	5453057	A	T	T	PASS	0/0	0/0	0/1	0/0	0/0	0/0	0/0	0/0	0/0	0/0	0/0	0/0	11	1	1187		TRUE
5	6131604	A	C	C	SNP_LowQualityDepth	0/0	0/0	0/0	0/0	0/1	0/0	0/0	0/0	0/0	0/0	0/0	0/0	11	1	FALSE	TRUE	TRUE
5	6373847	A	C	C	PASS	0/0	0/0	0/0	0/0	0/1	0/0	0/0	0/0	0/0	0/0	0/0	0/0	11	1	1188		TRUE
5	6468284	C	A	A	PASS	0/0	0/0	0/0	0/0	0/0	0/1	0/0	0/0	0/0	0/0	0/0	0/0	11	1	1189		TRUE
5	6689362	T	A	A	PASS	0/0	0/0	0/0	0/1	0/0	0/0	0/0	0/0	0/0	0/0	0/0	0/0	11	1	1190		TRUE
5	6950720	G	T	T	PASS	0/0	0/0	0/0	0/0	0/0	0/0	0/0	0/1	0/0	0/0	0/0	0/0	11	1	1191		TRUE
5	7930148	C	A	A	PASS	0/0	0/0	0/0	0/0	0/0	0/0	0/0	0/0	0/0	0/0	0/0	0/1	11	1	1192		TRUE
5	8307970	G	A	A	PASS	0/0	0/0	0/1	0/0	0/0	0/0	0/0	0/0	0/0	0/0	0/0	0/0	11	1	1193		TRUE
5	8693131	C	A	A	PASS	0/0	0/0	0/0	0/0	0/0	0/0	0/0	0/0	0/1	0/0	0/0	0/0	11	1	1194		TRUE
5	9633674	C	T	T	PASS	0/0	0/0	0/0	0/0	0/1	0/0	0/0	0/0	0/0	0/0	0/0	0/0	11	1	1195		TRUE
5	9980373	T	C	C	PASS	0/0	0/1	0/0	0/0	0/0	0/0	0/0	0/0	0/0	0/0	0/0	0/0	11	1	1196		TRUE
5	9987943	G	T	T	PASS	0/0	0/0	0/0	0/0	0/0	0/0	0/1	0/0	0/0	0/0	0/0	0/0	11	1	1197		TRUE
5	10083356	A	G	G	PASS	0/0	0/0	0/1	0/0	0/0	0/0	0/0	0/0	0/0	0/0	0/0	0/0	11	1	1198		TRUE
5	10192051	G	A	A	PASS	0/0	0/1	0/0	0/0	0/0	0/0	0/0	0/0	0/0	0/0	0/0	0/0	11	1	1199		TRUE
5	10553113	C	T	T	PASS	0/0	0/1	0/0	0/0	0/0	0/0	0/0	0/0	0/0	0/0	0/0	0/0	11	1	1200		TRUE
5	10728259	C	A	A	PASS	0/0	0/0	0/0	0/0	0/1	0/0	0/0	0/0	0/0	0/0	0/0	0/0	11	1	1201		TRUE
5	11138294	T	C	C	PASS	0/0	0/0	0/1	0/0	0/0	0/0	0/0	0/0	0/0	0/0	0/0	0/0	11	1	1202		TRUE
5	11226258	C	G	G	PASS	0/0	0/0	0/0	0/1	0/0	0/0	0/0	0/0	0/0	0/0	0/0	0/0	11	1	1203		TRUE
5	12178680	T	A	A	PASS	0/0	0/0	0/0	0/0	0/0	0/0	0/0	0/0	0/1	0/0	0/0	0/0	11	1	1204		TRUE
5	12686374	A	C	C	PASS	0/0	0/0	0/0	0/0	0/1	0/0	0/0	0/0	0/0	0/0	0/0	0/0	11	1	1205		TRUE
5	12697224	G	A	A	PASS	0/0	0/0	0/0	0/0	0/0	0/1	0/0	0/0	0/0	0/0	0/0	0/0	11	1	1206		TRUE
5	13625747	A	T	T	PASS	0/0	0/0	0/1	0/0	0/0	0/0	0/0	0/0	0/0	0/0	0/0	0/0	11	1	1207		TRUE
5	13626005	C	A	A	PASS	0/1	0/0	0/0	0/0	0/0	0/0	0/0	0/0	0/0	0/0	0/0	0/0	11	1	1208		TRUE
5	13890945	C	A	A	PASS	0/1	0/0	0/0	0/0	0/0	0/0	0/0	0/0	0/0	0/0	0/0	0/0	11	1	1209		TRUE
5	13907638	C	A	A	PASS	0/0	0/0	0/1	0/0	0/0	0/0	0/0	0/0	0/0	0/0	0/0	0/0	11	1	1210		TRUE
5	14524732	G	A	A	PASS	0/0	0/1	0/0	0/0	0/0	0/0	0/0	0/0	0/0	0/0	0/0	0/0	11	1	1211		TRUE
5	14606905	A	T	T	PASS	0/0	0/0	0/0	0/0	0/0	0/0	0/0	0/1	0/0	0/0	0/0	0/0	11	1	1212		TRUE
5	14734243	A	C	C	PASS	0/0	0/0	0/0	0/0	0/0	0/0	0/0	0/0	0/0	0/0	0/1	0/0	11	1	1213		TRUE
5	14786662	C	T	T	PASS	0/0	0/1	0/0	0/0	0/0	0/0	0/0	0/0	0/0	0/0	0/0	0/0	11	1	1214		TRUE
5	15945092	C	A	A	PASS	0/0	0/0	0/0	0/0	0/1	0/0	0/0	0/0	0/0	0/0	0/0	0/0	11	1	1215		TRUE
5	16423624	T	C	C	PASS	0/0	0/0	0/0	0/0	0/0	0/0	0/0	0/0	0/1	0/0	0/0	0/0	11	1	1216		TRUE
5	16997096	G	A	A	PASS	0/0	0/0	0/0	0/0	0/0	0/0	0/1	0/0	0/0	0/0	0/0	0/0	11	1	1217		TRUE
5	17285680	T	C	C	PASS	0/0	0/0	0/1	0/0	0/0	0/0	0/0	0/0	0/0	0/0	0/0	0/0	11	1	1218		TRUE
5	18527359	T	C	C	PASS	0/0	0/0	0/0	0/0	0/0	0/0	0/0	0/1	0/0	0/0	0/0	0/0	11	1	1219		TRUE
5	18902736	T	C	C	PASS	0/0	0/0	0/1	0/0	0/0	0/0	0/0	0/0	0/0	0/0	0/0	0/0	11	1	1220		TRUE
5	19267156	C	A	A	PASS	0/0	0/0	0/0	0/0	0/1	0/0	0/0	0/0	0/0	0/0	0/0	0/0	11	1	1221		TRUE
5	19392778	C	T	T	PASS	0/0	0/0	0/0	0/1	0/0	0/0	0/0	0/0	0/0	0/0	0/0	0/0	11	1	1222		TRUE
5	20046318	C	T	T	PASS	0/0	0/0	0/0	0/0	0/1	0/0	0/0	0/0	0/0	0/0	0/0	0/0	11	1	1223		TRUE
5	22207934	C	A	A	PASS	0/0	0/0	0/0	0/0	0/0	0/0	0/0	0/0	0/0	0/0	0/0	0/1	11	1	1224		TRUE
5	22418526	T	C	C	PASS	0/0	0/0	0/0	0/0	0/0	0/0	0/0	0/0	0/0	0/0	0/1	0/0	11	1	1225		TRUE
5	22800600	C	A	A	PASS	0/0	0/0	0/0	0/0	0/0	0/0	0/0	0/0	0/0	0/0	0/0	0/1	11	1	1226		TRUE
5	26756925	G	C	C	PASS	0/0	0/0	0/0	0/1	0/0	0/0	0/0	0/0	0/0	0/0	0/0	0/0	11	1	1227		TRUE
5	26948341	A	G	G	PASS	0/0	0/0	0/0	0/1	0/0	0/0	0/0	0/0	0/0	0/0	0/0	0/0	11	1	1228		TRUE
5	28178574	G	T	T	PASS	0/1	0/0	0/0	0/0	0/0	0/0	0/0	0/0	0/0	0/0	0/0	0/0	11	1	1229		TRUE
5	28316537	G	A	A	PASS	0/0	0/0	0/0	0/0	0/1	0/0	0/0	0/0	0/0	0/0	0/0	0/0	11	1	1230		TRUE
5	28628221	T	G	G	PASS	0/0	0/0	0/1	0/0	0/0	0/0	0/0	0/0	0/0	0/0	0/0	0/0	11	1	1231		TRUE
5	29851293	G	T	T	PASS	0/1	0/0	0/0	0/0	0/0	0/0	0/0	0/0	0/0	0/0	0/0	0/0	11	1	1232		TRUE
5	30760121	C	A	A	PASS	0/0	0/1	0/0	0/0	0/0	0/0	0/0	0/0	0/0	0/0	0/0	0/0	11	1	1233		TRUE
5	33552622	G	T	T	PASS	0/0	0/0	0/0	0/0	0/0	0/0	0/0	0/0	0/1	0/0	0/0	0/0	11	1	1234		TRUE
5	35054404	G	T	T	PASS	0/1	0/0	0/0	0/0	0/0	0/0	0/0	0/0	0/0	0/0	0/0	0/0	11	1	1235		TRUE
5	35339920	G	T	T	PASS	0/0	0/0	0/0	0/1	0/0	0/0	0/0	0/0	0/0	0/0	0/0	0/0	11	1	1236		TRUE
5	35722927	T	C	C	PASS	0/0	0/0	0/0	0/0	0/0	0/0	0/0	0/0	0/0	0/0	0/1	0/0	11	1	1237		TRUE
5	35834768	C	T	T	PASS	0/0	0/0	0/0	0/0	0/1	0/0	0/0	0/0	0/0	0/0	0/0	0/0	11	1	1238		TRUE
5	39316667	G	A	A	PASS	0/0	0/0	0/0	0/1	0/0	0/0	0/0	0/0	0/0	0/0	0/0	0/0	11	1	1239		TRUE
5	39777278	T	A	A	PASS	0/0	0/0	0/1	0/0	0/0	0/0	0/0	0/0	0/0	0/0	0/0	0/0	11	1	1240		TRUE
5	40244220	C	A	A	PASS	0/1	0/0	0/0	0/0	0/0	0/0	0/0	0/0	0/0	0/0	0/0	0/0	11	1	1241		TRUE
5	40293011	C	A	A	PASS	0/0	0/0	0/0	0/0	0/0	0/0	0/0	0/0	0/1	0/0	0/0	0/0	11	1	1242		TRUE
5	40449053	T	A	A	PASS	0/0	0/0	0/0	0/0	0/1	0/0	0/0	0/0	0/0	0/0	0/0	0/0	11	1	1243		TRUE
5	40918903	G	A	A	PASS	0/0	0/0	0/0	0/1	0/0	0/0	0/0	0/0	0/0	0/0	0/0	0/0	11	1	1244		TRUE
5	41389358	G	T	T	PASS	0/1	0/0	0/0	0/0	0/0	0/0	0/0	0/0	0/0	0/0	0/0	0/0	11	1	1245		TRUE
5	41980176	C	A	A	PASS	0/0	0/0	0/1	0/0	0/0	0/0	0/0	0/0	0/0	0/0	0/0	0/0	11	1	1246		TRUE
5	42304338	A	G	G	PASS	0/0	0/1	0/0	0/0	0/0	0/0	0/0	0/0	0/0	0/0	0/0	0/0	11	1	1247		TRUE
5	42319764	T	C	C	PASS	0/0	0/0	0/1	0/0	0/0	0/0	0/0	0/0	0/0	0/0	0/0	0/0	11	1	1248		TRUE
5	43272427	G	A	A	PASS	0/0	0/0	0/0	0/0	0/0	0/0	0/0	0/0	0/0	0/0	0/1	0/0	11	1	1249		TRUE
5	43595447	T	C	C	PASS	0/0	0/0	0/0	0/0	0/0	0/0	0/0	0/0	0/0	0/0	0/1	0/0	11	1	1250		TRUE
5	44479409	G	A	A	PASS	0/0	0/0	0/1	0/0	0/0	0/0	0/0	0/0	0/0	0/0	0/0	0/0	11	1	1251		TRUE
5	45032958	T	G	G	PASS	0/0	0/0	0/0	0/1	0/0	0/0	0/0	0/0	0/0	0/0	0/0	0/0	11	1	1252		TRUE
5	45349336	C	T	T	SnpCluster	0/0	0/0	0/1	0/0	0/0	0/0	0/0	0/0	0/0	0/0	0/0	0/0	11	1	FALSE	TRUE	TRUE
5	45350914	C	T	T	PASS	0/0	0/0	0/0	0/0	0/1	0/0	0/0	0/0	0/0	0/0	0/0	0/0	11	1	1253		TRUE
5	46036117	C	G	G	PASS	0/0	0/0	0/0	0/1	0/0	0/0	0/0	0/0	0/0	0/0	0/0	0/0	11	1	1254		TRUE
5	46041752	G	T	T	PASS	0/1	0/0	0/0	0/0	0/0	0/0	0/0	0/0	0/0	0/0	0/0	0/0	11	1	1255		TRUE
5	46361672	C	A	A	PASS	0/1	0/0	0/0	0/0	0/0	0/0	0/0	0/0	0/0	0/0	0/0	0/0	11	1	1256		TRUE
5	47748940	T	A	A	PASS	0/0	0/0	0/0	0/1	0/0	0/0	0/0	0/0	0/0	0/0	0/0	0/0	11	1	1257		TRUE
5	48974827	A	C	C	PASS	0/0	0/0	0/0	0/0	0/0	0/0	0/0	0/0	0/0	0/0	0/1	0/0	11	1	1258		TRUE
5	49425728	T	G	G	PASS	0/0	0/0	0/1	0/0	0/0	0/0	0/0	0/0	0/0	0/0	0/0	0/0	11	1	1259		TRUE
5	49912946	G	A	A	PASS	0/0	0/0	0/0	0/0	0/1	0/0	0/0	0/0	0/0	0/0	0/0	0/0	11	1	1260		TRUE
5	50162934	G	T	T	PASS	0/0	0/0	0/1	0/0	0/0	0/0	0/0	0/0	0/0	0/0	0/0	0/0	11	1	1261		TRUE
5	50455578	G	T	T	PASS	0/0	0/0	0/0	0/0	0/0	0/0	0/0	0/1	0/0	0/0	0/0	0/0	11	1	1262		TRUE
5	50704069	C	T	T	PASS	0/1	0/0	0/0	0/0	0/0	0/0	0/0	0/0	0/0	0/0	0/0	0/0	11	1	1263		TRUE
5	50972816	A	G	G	PASS	0/0	0/0	0/1	0/0	0/0	0/0	0/0	0/0	0/0	0/0	0/0	0/0	11	1	1264		TRUE
5	51889451	C	G	G	PASS	0/0	0/0	0/0	0/0	0/1	0/0	0/0	0/0	0/0	0/0	0/0	0/0	11	1	1265		TRUE
5	52172658	T	C	C	PASS	0/0	0/1	0/0	0/0	0/0	0/0	0/0	0/0	0/0	0/0	0/0	0/0	11	1	1266		TRUE
5	52184539	A	C	C	PASS	0/0	0/0	0/0	0/0	0/0	0/0	0/0	0/0	0/1	0/0	0/0	0/0	11	1	1267		TRUE
5	52263711	G	A	A	PASS	0/0	0/0	0/0	0/1	0/0	0/0	0/0	0/0	0/0	0/0	0/0	0/0	11	1	1268		TRUE
5	52967037	G	T	T	PASS	0/1	0/0	0/0	0/0	0/0	0/0	0/0	0/0	0/0	0/0	0/0	0/0	11	1	1269		TRUE
5	53500643	G	T	T	PASS	0/1	0/0	0/0	0/0	0/0	0/0	0/0	0/0	0/0	0/0	0/0	0/0	11	1	1270		TRUE
5	53829279	G	A	A	PASS	0/0	0/1	0/0	0/0	0/0	0/0	0/0	0/0	0/0	0/0	0/0	0/0	11	1	1271		TRUE
5	54176225	G	T	T	PASS	0/0	0/0	0/0	0/1	0/0	0/0	0/0	0/0	0/0	0/0	0/0	0/0	11	1	1272		TRUE
5	54245554	G	T	T	SNP_LowQualityDepth	0/0	0/0	0/0	0/0	0/0	0/1	0/0	0/0	0/0	0/0	0/0	0/0	11	1	FALSE	TRUE	TRUE
5	54327311	A	T	T	PASS	0/0	0/0	0/0	0/0	0/1	0/0	0/0	0/0	0/0	0/0	0/0	0/0	11	1	1273		TRUE
5	54402194	G	T	T	PASS	0/0	0/0	0/0	0/0	0/0	0/0	0/0	0/0	0/1	0/0	0/0	0/0	11	1	1274		TRUE
5	54402195	T	C	C	PASS	0/0	0/0	0/0	0/0	0/0	0/0	0/0	0/0	0/1	0/0	0/0	0/0	11	1	1275		TRUE
5	55001371	C	A	A	PASS	0/0	0/1	0/0	0/0	0/0	0/0	0/0	0/0	0/0	0/0	0/0	0/0	11	1	1276		TRUE
5	55040793	G	A	A	PASS	0/0	0/0	0/0	0/0	0/0	0/0	0/0	0/0	0/0	0/0	0/0	0/1	11	1	1277		TRUE
5	55239491	C	A	A	PASS	0/0	0/0	0/0	0/0	0/0	0/0	0/0	0/0	0/0	0/0	0/0	0/1	11	1	1278		TRUE
5	55512303	G	T	T	PASS	0/0	0/0	0/0	0/0	0/0	0/0	0/0	0/1	0/0	0/0	0/0	0/0	11	1	1279		TRUE
5	55682834	G	T	T	PASS	0/1	0/0	0/0	0/0	0/0	0/0	0/0	0/0	0/0	0/0	0/0	0/0	11	1	1280		TRUE
5	55710356	C	A	A	PASS	0/0	0/0	0/0	0/0	0/1	0/0	0/0	0/0	0/0	0/0	0/0	0/0	11	1	1281		TRUE
5	55771807	G	A	A	PASS	0/0	0/0	0/1	0/0	0/0	0/0	0/0	0/0	0/0	0/0	0/0	0/0	11	1	1282		TRUE
5	56592920	G	A	A	PASS	0/0	0/0	0/0	0/0	0/0	0/0	0/0	0/0	0/0	0/0	0/1	0/0	11	1	1283		TRUE
5	57093876	C	A	A	PASS	0/0	0/0	0/0	0/0	0/0	0/0	0/0	0/0	0/1	0/0	0/0	0/0	11	1	1284		TRUE
5	57640358	G	T	T	PASS	0/0	0/0	0/0	0/0	0/1	0/0	0/0	0/0	0/0	0/0	0/0	0/0	11	1	1285		TRUE
5	58014935	A	C	C	PASS	0/0	0/0	0/1	0/0	0/0	0/0	0/0	0/0	0/0	0/0	0/0	0/0	11	1	1286		TRUE
5	58659777	G	A	A	PASS	0/0	0/1	0/0	0/0	0/0	0/0	0/0	0/0	0/0	0/0	0/0	0/0	11	1	1287		TRUE
5	58712509	C	A	A	PASS	0/0	0/0	0/0	0/0	0/0	0/1	0/0	0/0	0/0	0/0	0/0	0/0	11	1	1288		TRUE
5	58890636	C	A	A	PASS	0/1	0/0	0/0	0/0	0/0	0/0	0/0	0/0	0/0	0/0	0/0	0/0	11	1	1289		TRUE
5	58949058	G	T	T	PASS	0/1	0/0	0/0	0/0	0/0	0/0	0/0	0/0	0/0	0/0	0/0	0/0	11	1	1290		TRUE
5	59047273	T	G	G	PASS	0/0	0/1	0/0	0/0	0/0	0/0	0/0	0/0	0/0	0/0	0/0	0/0	11	1	1291		TRUE
5	59194829	G	T	T	PASS	0/0	0/0	0/1	0/0	0/0	0/0	0/0	0/0	0/0	0/0	0/0	0/0	11	1	1292		TRUE
5	59202560	G	T	T	PASS	0/0	0/0	0/1	0/0	0/0	0/0	0/0	0/0	0/0	0/0	0/0	0/0	11	1	1293		TRUE
5	59202561	A	T	T	PASS	0/0	0/0	0/1	0/0	0/0	0/0	0/0	0/0	0/0	0/0	0/0	0/0	11	1	1294		TRUE
5	59243200	G	A	A	PASS	0/1	0/0	0/0	0/0	0/0	0/0	0/0	0/0	0/0	0/0	0/0	0/0	11	1	1295		TRUE
5	59299873	G	C	C	PASS	0/0	0/0	0/0	0/0	0/0	0/0	0/0	0/0	0/1	0/0	0/0	0/0	11	1	1296		TRUE
5	59299884	C	T	T	PASS	0/0	0/0	0/0	0/0	0/0	0/0	0/0	0/0	0/1	0/0	0/0	0/0	11	1	1297		TRUE
5	59558302	G	A	A	PASS	0/0	0/0	0/0	0/0	0/0	0/1	0/0	0/0	0/0	0/0	0/0	0/0	11	1	1298		TRUE
5	59899912	A	T	T	PASS	0/0	0/0	0/0	0/0	0/0	0/0	0/0	0/0	0/0	0/0	0/1	0/0	11	1	1299		TRUE
5	60465123	A	T	T	PASS	0/0	0/0	0/0	0/0	0/0	0/0	0/0	0/0	0/0	0/0	0/1	0/0	11	1	1300		TRUE
5	60627292	C	A	A	PASS	0/0	0/0	0/1	0/0	0/0	0/0	0/0	0/0	0/0	0/0	0/0	0/0	11	1	1301		TRUE
5	61110603	T	C	C	PASS	0/0	0/0	0/0	0/0	0/0	0/1	0/0	0/0	0/0	0/0	0/0	0/0	11	1	1302		TRUE
5	61116882	C	A	A	PASS	0/0	0/0	0/0	0/0	0/1	0/0	0/0	0/0	0/0	0/0	0/0	0/0	11	1	1303		TRUE
5	61244904	G	T	#N/A	#N/A	#N/A	#N/A	#N/A	#N/A	#N/A	#N/A	#N/A	#N/A	#N/A	#N/A	#N/A	#N/A	0	0	FALSE	TRUE	TRUE
5	61267521	C	T	T	PASS	0/0	0/0	0/0	0/0	0/0	0/0	0/0	0/0	0/1	0/0	0/0	0/0	11	1	1304		TRUE
5	61458797	A	C	C	PASS	0/0	0/0	0/0	0/0	0/0	0/1	0/0	0/0	0/0	0/0	0/0	0/0	11	1	1305		TRUE
5	61478588	G	A	A	PASS	0/0	0/0	0/0	0/0	0/0	0/0	0/0	0/0	0/0	0/0	0/1	0/0	11	1	1306		TRUE
5	62161552	T	A	A	PASS	0/0	0/0	0/1	0/0	0/0	0/0	0/0	0/0	0/0	0/0	0/0	0/0	11	1	1307		TRUE
5	62207368	G	T	T	PASS	0/0	0/0	0/1	0/0	0/0	0/0	0/0	0/0	0/0	0/0	0/0	0/0	11	1	1308		TRUE
5	62352204	A	T	T	PASS	0/0	0/0	0/1	0/0	0/0	0/0	0/0	0/0	0/0	0/0	0/0	0/0	11	1	1309		TRUE
5	62557023	T	C	C	PASS	0/0	0/0	0/0	0/0	0/0	0/0	0/0	0/0	0/1	0/0	0/0	0/0	11	1	1310		TRUE
5	63307040	T	A	A	PASS	0/0	0/0	0/0	0/0	0/0	0/0	0/0	0/0	0/0	0/0	0/1	0/0	11	1	1311		TRUE
5	63506691	G	T	T	PASS	0/0	0/0	0/0	0/0	0/0	0/0	0/0	0/0	0/1	0/0	0/0	0/0	11	1	1312		TRUE
5	63559864	G	T	T	PASS	0/0	0/0	0/0	0/0	0/0	0/0	0/0	0/0	0/1	0/0	0/0	0/0	11	1	1313		TRUE
5	64310428	C	T	T	PASS	0/0	0/0	0/0	0/0	0/0	0/0	0/0	0/0	0/0	0/0	0/1	0/0	11	1	1314		TRUE
5	64719548	C	T	T	PASS	0/0	0/0	0/0	0/0	0/1	0/0	0/0	0/0	0/0	0/0	0/0	0/0	11	1	1315		TRUE
5	66924640	C	A	A	PASS	0/0	0/0	0/0	0/0	0/0	0/0	0/1	0/0	0/0	0/0	0/0	0/0	11	1	1316		TRUE
5	67190055	G	A	A	PASS	0/1	0/0	0/0	0/0	0/0	0/0	0/0	0/0	0/0	0/0	0/0	0/0	11	1	1317		TRUE
5	67498247	G	T	T	PASS	0/0	0/0	0/0	0/0	0/0	0/0	0/1	0/0	0/0	0/0	0/0	0/0	11	1	1318		TRUE
5	67559349	C	G	G	PASS	0/0	0/0	0/0	0/0	0/1	0/0	0/0	0/0	0/0	0/0	0/0	0/0	11	1	1319		TRUE
5	67902929	G	A	A	PASS	0/0	0/0	0/0	0/0	0/0	0/0	0/0	0/0	0/0	0/0	0/0	0/1	11	1	1320		TRUE
5	68088578	G	A	A	PASS	0/0	0/0	0/0	0/0	0/0	0/0	0/1	0/0	0/0	0/0	0/0	0/0	11	1	1321		TRUE
5	68132941	C	T	T	PASS	0/0	0/0	0/0	0/0	0/0	0/0	0/0	0/0	0/0	0/0	0/0	0/1	11	1	1322		TRUE
5	68351012	G	T	T	PASS	0/0	0/0	0/0	0/1	0/0	0/0	0/0	0/0	0/0	0/0	0/0	0/0	11	1	1323		TRUE
5	68533879	G	C	C	PASS	0/0	0/0	0/0	0/0	0/1	0/0	0/0	0/0	0/0	0/0	0/0	0/0	11	1	1324		TRUE
5	68685294	A	C	C	PASS	0/1	0/0	0/0	0/0	0/0	0/0	0/0	0/0	0/0	0/0	0/0	0/0	11	1	1325		TRUE
5	68974765	G	A	A	PASS	0/0	0/0	0/0	0/0	0/0	0/1	0/0	0/0	0/0	0/0	0/0	0/0	11	1	1326		TRUE
5	69393765	C	A	A	PASS	0/0	0/0	0/0	0/0	0/1	0/0	0/0	0/0	0/0	0/0	0/0	0/0	11	1	1327		TRUE
5	69975040	G	T	T	PASS	0/0	0/1	0/0	0/0	0/0	0/0	0/0	0/0	0/0	0/0	0/0	0/0	11	1	1328		TRUE
5	70482690	C	A	A	PASS	0/0	0/0	0/0	0/1	0/0	0/0	0/0	0/0	0/0	0/0	0/0	0/0	11	1	1329		TRUE
5	71083235	T	G	G	PASS	0/0	0/0	0/0	0/1	0/0	0/0	0/0	0/0	0/0	0/0	0/0	0/0	11	1	1330		TRUE
5	71588690	A	T	T	PASS	0/0	0/0	0/0	0/1	0/0	0/0	0/0	0/0	0/0	0/0	0/0	0/0	11	1	1331		TRUE
5	71798204	T	C	C	PASS	0/0	0/0	0/0	0/0	0/1	0/0	0/0	0/0	0/0	0/0	0/0	0/0	11	1	1332		TRUE
5	71910609	A	T	T	PASS	0/0	0/0	0/1	0/0	0/0	0/0	0/0	0/0	0/0	0/0	0/0	0/0	11	1	1333		TRUE
5	72395066	A	G	G	PASS	0/1	0/0	0/0	0/0	0/0	0/0	0/0	0/0	0/0	0/0	0/0	0/0	11	1	1334		TRUE
5	73899586	A	T	T	PASS	0/0	0/0	0/1	0/0	0/0	0/0	0/0	0/0	0/0	0/0	0/0	0/0	11	1	1335		TRUE
5	75669194	C	T	T	PASS	0/0	0/1	0/0	0/0	0/0	0/0	0/0	0/0	0/0	0/0	0/0	0/0	11	1	1336		TRUE
5	76273111	G	T	T	PASS	0/1	0/0	0/0	0/0	0/0	0/0	0/0	0/0	0/0	0/0	0/0	0/0	11	1	1337		TRUE
5	76624327	C	A	A	PASS	0/1	0/0	0/0	0/0	0/0	0/0	0/0	0/0	0/0	0/0	0/0	0/0	11	1	1338		TRUE
5	76723266	C	A	A	PASS	0/0	0/0	0/0	0/0	0/1	0/0	0/0	0/0	0/0	0/0	0/0	0/0	11	1	1339		TRUE
5	76832465	C	A	A	PASS	0/0	0/0	0/0	0/0	0/0	0/0	0/0	0/0	0/1	0/0	0/0	0/0	11	1	1340		TRUE
5	77647227	G	C	C	PASS	0/0	0/0	0/1	0/0	0/0	0/0	0/0	0/0	0/0	0/0	0/0	0/0	11	1	1341		TRUE
5	77782996	G	T	T	PASS	0/0	0/0	0/0	0/0	0/0	0/0	0/0	0/1	0/0	0/0	0/0	0/0	11	1	1342		TRUE
5	78214565	A	G	G	PASS	0/0	0/1	0/0	0/0	0/0	0/0	0/0	0/0	0/0	0/0	0/0	0/0	11	1	1343		TRUE
5	78627182	A	C	C	PASS	0/0	0/0	0/1	0/0	0/0	0/0	0/0	0/0	0/0	0/0	0/0	0/0	11	1	1344		TRUE
5	78936043	G	A	A	PASS	0/0	0/0	0/0	0/0	0/0	0/0	0/1	0/0	0/0	0/0	0/0	0/0	11	1	1345		TRUE
5	79152512	C	T	T	PASS	0/0	0/0	0/0	0/0	0/0	0/0	0/0	0/0	0/0	0/0	0/1	0/0	11	1	1346		TRUE
5	79268184	A	G	G	PASS	0/0	0/0	0/0	0/0	0/0	0/0	0/1	0/0	0/0	0/0	0/0	0/0	11	1	1347		TRUE
5	79413315	G	T	T	PASS	0/0	0/0	0/0	0/0	0/0	0/0	0/0	0/0	0/0	0/0	0/0	0/1	11	1	1348		TRUE
5	80323421	G	A	A	PASS	0/1	0/0	0/0	0/0	0/0	0/0	0/0	0/0	0/0	0/0	0/0	0/0	11	1	1349		TRUE
5	80410700	C	A	A	PASS	0/0	0/0	0/0	0/0	0/1	0/0	0/0	0/0	0/0	0/0	0/0	0/0	11	1	1350		TRUE
5	80721056	C	T	T	PASS	0/0	0/0	0/0	0/1	0/0	0/0	0/0	0/0	0/0	0/0	0/0	0/0	11	1	1351		TRUE
5	81948601	T	G	#N/A	#N/A	#N/A	#N/A	#N/A	#N/A	#N/A	#N/A	#N/A	#N/A	#N/A	#N/A	#N/A	#N/A	0	0	FALSE	FALSE	FALSE
5	82443358	C	T	T	PASS	0/0	0/0	0/0	0/0	0/0	0/0	0/0	0/0	0/1	0/0	0/0	0/0	11	1	1352		TRUE
5	82709492	G	A	A	PASS	0/1	0/0	0/0	0/0	0/0	0/0	0/0	0/0	0/0	0/0	0/0	0/0	11	1	1353		TRUE
5	82781681	C	T	T	PASS	0/0	0/0	0/0	0/0	0/1	0/0	0/0	0/0	0/0	0/0	0/0	0/0	11	1	1354		TRUE
5	83615545	C	A	A	PASS	0/0	0/0	0/0	0/0	0/1	0/0	0/0	0/0	0/0	0/0	0/0	0/0	11	1	1355		TRUE
5	84114677	G	T	T	PASS	0/0	0/0	0/0	0/0	0/0	0/1	0/0	0/0	0/0	0/0	0/0	0/0	11	1	1356		TRUE
5	84424851	C	A	A	PASS	0/0	0/0	0/0	0/0	0/0	0/0	0/0	0/0	0/0	0/0	0/0	0/1	11	1	1357		TRUE
5	84631948	A	C	C	PASS	0/0	0/0	0/0	0/0	0/0	0/1	0/0	0/0	0/0	0/0	0/0	0/0	11	1	1358		TRUE
5	85136450	A	C	C	PASS	0/0	0/0	0/1	0/0	0/0	0/0	0/0	0/0	0/0	0/0	0/0	0/0	11	1	1359		TRUE
5	85158126	G	T	T	PASS	0/0	0/0	0/1	0/0	0/0	0/0	0/0	0/0	0/0	0/0	0/0	0/0	11	1	1360		TRUE
5	85620312	C	A	A	PASS	0/0	0/0	0/1	0/0	0/0	0/0	0/0	0/0	0/0	0/0	0/0	0/0	11	1	1361		TRUE
5	85671153	A	T	T	PASS	0/0	0/0	0/0	0/0	0/1	0/0	0/0	0/0	0/0	0/0	0/0	0/0	11	1	1362		TRUE
5	86894377	G	T	T	PASS	0/1	0/0	0/0	0/0	0/0	0/0	0/0	0/0	0/0	0/0	0/0	0/0	11	1	1363		TRUE
5	87682775	G	A	A	PASS	0/1	0/0	0/0	0/0	0/0	0/0	0/0	0/0	0/0	0/0	0/0	0/0	11	1	1364		TRUE
5	87939846	G	A	A	PASS	0/0	0/0	0/0	0/0	0/0	0/1	0/0	0/0	0/0	0/0	0/0	0/0	11	1	1365		TRUE
5	88193231	G	T	T	PASS	0/0	0/0	0/0	0/0	0/0	0/1	0/0	0/0	0/0	0/0	0/0	0/0	11	1	1366		TRUE
5	97869304	G	A	A	PASS	0/0	0/1	0/0	0/0	0/0	0/0	0/0	0/0	0/0	0/0	0/0	0/0	11	1	1367		TRUE
5	98180699	A	G	G	PASS	0/0	0/0	0/0	0/0	0/0	0/0	0/0	0/0	0/0	0/0	0/1	0/0	11	1	1368		TRUE
5	99068724	G	T	T	PASS	0/0	0/0	0/0	0/0	0/0	0/0	0/0	0/1	0/0	0/0	0/0	0/0	11	1	1369		TRUE
5	99141929	G	C	C	PASS	0/0	0/0	0/0	0/0	0/1	0/0	0/0	0/0	0/0	0/0	0/0	0/0	11	1	1370		TRUE
5	99375015	T	G	G	PASS	0/0	0/0	1/1	0/0	0/0	0/0	0/0	0/0	0/0	0/0	0/0	0/0	11	1	1371		TRUE
5	101107315	C	A	A	PASS	0/0	0/0	0/1	0/0	0/0	0/0	0/0	0/0	0/0	0/0	0/0	0/0	11	1	1372		TRUE
5	101368904	T	C	C	PASS	0/0	0/1	0/0	0/0	0/0	0/0	0/0	0/0	0/0	0/0	0/0	0/0	11	1	1373		TRUE
5	101461677	G	T	T	PASS	0/0	0/1	0/0	0/0	0/0	0/0	0/0	0/0	0/0	0/0	0/0	0/0	11	1	1374		TRUE
5	102337631	A	G	G	PASS	0/0	0/0	0/1	0/0	0/0	0/0	0/0	0/0	0/0	0/0	0/0	0/0	11	1	1375		TRUE
5	102337632	G	A	A	PASS	0/0	0/0	0/1	0/0	0/0	0/0	0/0	0/0	0/0	0/0	0/0	0/0	11	1	1376		TRUE
5	102677715	T	A	A	PASS	0/0	0/0	0/1	0/0	0/0	0/0	0/0	0/0	0/0	0/0	0/0	0/0	11	1	1377		TRUE
5	102996978	T	G	G	PASS	0/0	0/0	0/0	0/1	0/0	0/0	0/0	0/0	0/0	0/0	0/0	0/0	11	1	1378		TRUE
5	103021712	G	T	T	PASS	0/1	0/0	0/0	0/0	0/0	0/0	0/0	0/0	0/0	0/0	0/0	0/0	11	1	1379		TRUE
5	103028913	T	A	A	PASS	0/0	0/0	0/0	0/0	0/1	0/0	0/0	0/0	0/0	0/0	0/0	0/0	11	1	1380		TRUE
5	103167896	A	T	T	PASS	0/1	0/0	0/0	0/0	0/0	0/0	0/0	0/0	0/0	0/0	0/0	0/0	11	1	1381		TRUE
5	104094613	G	C	C	PASS	0/0	0/0	0/0	0/0	0/0	0/0	0/0	0/0	0/0	0/0	0/1	0/0	11	1	1382		TRUE
5	104271747	A	T	T	PASS	./.	0/0	./.	0/0	0/0	0/0	./.	0/0	./.	1/1	0/0	0/0	7	1	FALSE	?	FALSE
5	104332663	T	G	G	PASS	0/0	0/0	0/0	0/0	0/0	0/0	0/1	0/0	0/0	0/0	0/0	0/0	11	1	1383		TRUE
5	105699793	G	T	T	PASS	0/1	0/0	0/0	0/0	0/0	0/0	0/0	0/0	0/0	0/0	0/0	0/0	11	1	1384		TRUE
5	105703196	C	G	G	PASS	0/0	0/0	0/0	0/1	0/0	0/0	0/0	0/0	0/0	0/0	0/0	0/0	11	1	1385		TRUE
5	108288664	C	A	A	PASS	0/1	0/0	0/0	0/0	0/0	0/0	0/0	0/0	0/0	0/0	0/0	0/0	11	1	1386		TRUE
5	109184602	A	G	G	PASS	0/1	0/0	0/0	0/0	0/0	0/0	0/0	0/0	0/0	0/0	0/0	0/0	11	1	1387		TRUE
5	109245413	G	T	T	PASS	0/0	0/0	0/0	0/1	0/0	0/0	0/0	0/0	0/0	0/0	0/0	0/0	11	1	1388		TRUE
5	109325827	G	A	A	PASS	0/0	0/0	0/0	0/0	0/1	0/0	0/0	0/0	0/0	0/0	0/0	0/0	11	1	1389		TRUE
5	109371406	G	T	T	PASS	0/1	0/0	0/0	0/0	0/0	0/0	0/0	0/0	0/0	0/0	0/0	0/0	11	1	1390		TRUE
5	109526033	C	T	T	PASS	0/0	0/0	0/0	0/0	0/1	0/0	0/0	0/0	0/0	0/0	0/0	0/0	11	1	1391		TRUE
5	110463240	C	A	A	PASS	0/0	0/0	0/0	0/1	0/0	0/0	0/0	0/0	0/0	0/0	0/0	0/0	11	1	1392		TRUE
5	110526816	C	T	T	PASS	0/0	0/0	0/1	0/0	0/0	0/0	0/0	0/0	0/0	0/0	0/0	0/0	11	1	1393		TRUE
5	111582907	C	A	A	PASS	0/0	0/0	0/1	0/0	0/0	0/0	0/0	0/0	0/0	0/0	0/0	0/0	11	1	1394		TRUE
5	112255581	G	T	T	PASS	0/0	0/1	0/0	0/0	0/0	0/0	0/0	0/0	0/0	0/0	0/0	0/0	11	1	1395		TRUE
5	112410334	G	T	T	PASS	0/0	0/0	0/0	0/0	0/0	0/0	0/0	0/1	0/0	0/0	0/0	0/0	11	1	1396		TRUE
5	113097199	C	A	A	SNP_LowQualityDepth	0/0	0/0	0/0	0/0	0/0	0/0	0/0	0/0	0/0	0/0	0/0	0/1	11	1	FALSE	TRUE	TRUE
5	113676779	A	T	T	PASS	0/0	0/0	0/0	0/0	0/0	0/0	0/0	0/0	0/0	0/0	0/0	0/1	11	1	1397		TRUE
5	113809245	T	G	G	PASS	0/0	0/0	0/0	0/0	0/1	0/0	0/0	0/0	0/0	0/0	0/0	0/0	11	1	1398		TRUE
5	114039132	T	A	A	PASS	0/0	0/0	0/0	0/0	0/1	0/0	0/0	0/0	0/0	0/0	0/0	0/0	11	1	1399		TRUE
5	114685713	C	A	A	PASS	0/0	0/0	0/0	0/0	0/0	0/0	0/0	0/1	0/0	0/0	0/0	0/0	11	1	1400		TRUE
5	115628691	T	G	G	PASS	0/0	0/0	0/0	0/0	0/1	0/0	0/0	0/0	0/0	0/0	0/0	0/0	11	1	1401		TRUE
5	115686408	G	A	A	PASS	0/1	0/0	0/0	0/0	0/0	0/0	0/0	0/0	0/0	0/0	0/0	0/0	11	1	1402		TRUE
5	115823666	G	T	T	PASS	0/0	0/0	0/1	0/0	0/0	0/0	0/0	0/0	0/0	0/0	0/0	0/0	11	1	1403		TRUE
5	116157389	G	A	A	PASS	0/0	0/0	0/0	0/0	0/0	0/1	0/0	0/0	0/0	0/0	0/0	0/0	11	1	1404		TRUE
5	116835195	A	T	T	PASS	0/0	0/0	0/1	0/0	0/0	0/0	0/0	0/0	0/0	0/0	0/0	0/0	11	1	1405		TRUE
5	116899786	A	G	G	PASS	0/0	0/0	0/0	0/1	0/0	0/0	0/0	0/0	0/0	0/0	0/0	0/0	11	1	1406		TRUE
5	117542559	G	A	A	PASS	0/1	0/0	0/0	0/0	0/0	0/0	0/0	0/0	0/0	0/0	0/0	0/0	11	1	1407		TRUE
5	118808943	A	G	G	PASS	0/0	0/0	0/0	0/0	0/1	0/0	0/0	0/0	0/0	0/0	0/0	0/0	11	1	1408		TRUE
5	118848124	G	T	T	PASS	0/0	0/0	0/0	0/0	0/1	0/0	0/0	0/0	0/0	0/0	0/0	0/0	11	1	1409		TRUE
5	120235352	G	T	T	PASS	0/1	0/0	0/0	0/0	0/0	0/0	0/0	0/0	0/0	0/0	0/0	0/0	11	1	1410		TRUE
5	121948441	A	G	G	PASS	0/0	0/0	0/0	0/0	0/1	0/0	0/0	0/0	0/0	0/0	0/0	0/0	11	1	1411		TRUE
5	123011163	T	A	A,*	SNP_LowQualityDepth	0/0	0/0	0/1	0/0	0/0	0/2	0/2	0/0	0/0	0/0	0/0	0/2	8	0	FALSE	TRUE	TRUE
5	123309466	C	A	A	PASS	0/0	0/0	0/0	0/0	0/0	0/0	0/1	0/0	0/0	0/0	0/0	0/0	11	1	1412		TRUE
5	124760846	A	C	C	PASS	0/0	0/0	0/0	0/0	0/0	0/0	0/0	0/1	0/0	0/0	0/0	0/0	11	1	1413		TRUE
5	125943603	C	A	A	PASS	0/0	0/0	0/0	0/0	0/1	0/0	0/0	0/0	0/0	0/0	0/0	0/0	11	1	1414		TRUE
5	126611798	C	A	A	PASS	0/0	0/0	0/0	0/0	0/0	0/0	0/0	0/1	0/0	0/0	0/0	0/0	11	1	1415		TRUE
5	126639991	G	T	T	PASS	0/0	0/0	0/0	0/0	0/0	0/0	0/1	0/0	0/0	0/0	0/0	0/0	11	1	1416		TRUE
5	127625626	C	T	T	PASS	0/0	0/0	0/0	0/0	0/1	0/0	0/0	0/0	0/0	0/0	0/0	0/0	11	1	1417		TRUE
5	127981401	T	G	G	PASS	0/0	0/0	0/0	0/0	0/1	0/0	0/0	0/0	0/0	0/0	0/0	0/0	11	1	1418		TRUE
5	127998704	T	A	A	PASS	0/1	0/0	0/0	0/0	0/0	0/0	0/0	0/0	0/0	0/0	0/0	0/0	11	1	1419		TRUE
5	128112537	C	T	T	PASS	0/1	0/0	0/0	0/0	0/0	0/0	0/0	0/0	0/0	0/0	0/0	0/0	11	1	1420		TRUE
5	128343501	C	A	A	PASS	0/0	0/0	0/0	0/1	0/0	0/0	0/0	0/0	0/0	0/0	0/0	0/0	11	1	1421		TRUE
5	128371962	C	T	T	PASS	0/0	0/1	0/0	0/0	0/0	0/0	0/0	0/0	0/0	0/0	0/0	0/0	11	1	1422		TRUE
5	128616812	G	A	A	PASS	0/1	0/0	0/0	0/0	0/0	0/0	0/0	0/0	0/0	0/0	0/0	0/0	11	1	1423		TRUE
5	128767050	G	T	T	PASS	0/0	0/0	0/0	0/0	0/0	0/1	0/0	0/0	0/0	0/0	0/0	0/0	11	1	1424		TRUE
5	129078432	C	G	G	PASS	0/0	0/0	0/1	0/0	0/0	0/0	0/0	0/0	0/0	0/0	0/0	0/0	11	1	1425		TRUE
5	129142249	C	T	T	PASS	0/0	0/0	0/0	0/0	0/1	0/0	0/0	0/0	0/0	0/0	0/0	0/0	11	1	1426		TRUE
5	129279194	G	T	T	SNP_LowQualityDepth	0/0	0/0	0/0	0/0	0/1	0/0	0/0	0/0	0/0	0/0	0/0	0/0	11	1	FALSE	TRUE	TRUE
5	130499641	G	T	T	PASS	0/0	0/0	0/0	0/0	0/0	0/0	0/0	0/1	0/0	0/0	0/0	0/0	11	1	1427		TRUE
5	130561330	T	C	#N/A	#N/A	#N/A	#N/A	#N/A	#N/A	#N/A	#N/A	#N/A	#N/A	#N/A	#N/A	#N/A	#N/A	0	0	FALSE	FALSE	FALSE
5	130817548	C	T	T	PASS	0/0	0/0	0/0	0/0	0/0	0/0	0/1	0/0	0/0	0/0	0/0	0/0	11	1	1428		TRUE
5	130923624	G	T	T	PASS	0/0	0/0	0/0	0/0	0/0	0/0	0/0	0/1	0/0	0/0	0/0	0/0	11	1	1429		TRUE
5	131163445	G	C	C	PASS	0/0	0/0	0/1	0/0	0/0	0/0	0/0	0/0	0/0	0/0	0/0	0/0	11	1	1430		TRUE
5	131165129	G	T	T	PASS	0/0	0/0	0/0	0/0	0/0	0/0	0/0	0/0	0/0	0/0	0/1	0/0	11	1	1431		TRUE
5	131631154	T	A	A	PASS	0/0	0/0	0/0	0/1	0/0	0/0	0/0	0/0	0/0	0/0	0/0	0/0	11	1	1432		TRUE
5	132098404	G	T	T	PASS	0/1	0/0	0/0	0/0	0/0	0/0	0/0	0/0	0/0	0/0	0/0	0/0	11	1	1433		TRUE
5	132217926	G	T	T	PASS	0/0	0/0	0/0	0/0	0/0	0/0	0/0	0/1	0/0	0/0	0/0	0/0	11	1	1434		TRUE
5	132261128	G	T	T	PASS	0/0	0/1	0/0	0/0	0/0	0/0	0/0	0/0	0/0	0/0	0/0	0/0	11	1	1435		TRUE
5	132799646	T	C	C	PASS	0/1	0/0	0/0	0/0	0/0	0/0	0/0	0/0	0/0	0/0	0/0	0/0	11	1	1436		TRUE
5	133089115	C	G	G	PASS	0/0	0/0	0/1	0/0	0/0	0/0	0/0	0/0	0/0	0/0	0/0	0/0	11	1	1437		TRUE
5	133601859	A	T	T	PASS	0/0	0/0	0/1	0/0	0/0	0/0	0/0	0/0	0/0	0/0	0/0	0/0	11	1	1438		TRUE
5	133687305	T	C	C	PASS	0/1	0/0	0/0	0/0	0/0	0/0	0/0	0/0	0/0	0/0	0/0	0/0	11	1	1439		TRUE
5	136779182	T	G	#N/A	#N/A	#N/A	#N/A	#N/A	#N/A	#N/A	#N/A	#N/A	#N/A	#N/A	#N/A	#N/A	#N/A	0	0	FALSE	FALSE	FALSE
5	136894938	C	T	T	PASS	0/0	0/0	0/0	0/0	0/0	0/0	0/0	0/0	0/0	0/0	0/0	0/1	11	1	1440		TRUE
5	136918141	G	T	T	PASS	0/1	0/0	0/0	0/0	0/0	0/0	0/0	0/0	0/0	0/0	0/0	0/0	11	1	1441		TRUE
5	136928442	G	C	C	PASS	0/0	0/0	0/0	0/0	0/0	0/1	0/0	0/0	0/0	0/0	0/1	0/0	10	1	FALSE	FALSE	FALSE
5	136987614	G	T	T	PASS	0/1	0/0	0/0	0/0	0/0	0/0	0/0	0/0	0/0	0/0	0/0	0/0	11	1	1442		TRUE
5	137152417	G	T	#N/A	#N/A	#N/A	#N/A	#N/A	#N/A	#N/A	#N/A	#N/A	#N/A	#N/A	#N/A	#N/A	#N/A	0	0	FALSE	?	FALSE
5	139332643	G	C	C	PASS	0/0	0/0	0/0	0/0	0/1	0/0	0/0	0/0	0/0	0/0	0/0	0/0	11	1	1443		TRUE
5	139444220	G	T	T	PASS	0/0	0/0	0/0	0/0	0/0	0/0	0/0	0/0	0/0	0/0	0/0	0/1	11	1	1444		TRUE
5	139598775	G	T	T	PASS	0/0	0/0	0/1	0/0	0/0	0/0	0/0	0/0	0/0	0/0	0/0	0/0	11	1	1445		TRUE
5	141041407	C	G	#N/A	#N/A	#N/A	#N/A	#N/A	#N/A	#N/A	#N/A	#N/A	#N/A	#N/A	#N/A	#N/A	#N/A	0	0	FALSE	FALSE	FALSE
5	141610869	T	C	C	PASS	0/0	0/1	0/0	0/0	0/0	0/0	0/0	0/0	0/0	0/0	0/0	0/0	11	1	1446		TRUE
5	141802421	G	A	A	PASS	0/0	0/0	0/1	0/0	0/0	0/0	0/0	0/0	0/0	0/0	0/0	0/0	11	1	1447		TRUE
5	142207467	G	A	A	PASS	0/0	0/1	0/0	0/0	0/0	0/0	0/0	0/0	0/0	0/0	0/0	0/0	11	1	1448		TRUE
5	144424865	C	A	A	PASS	0/0	0/0	0/0	0/0	0/1	0/0	0/0	0/0	0/0	0/0	0/0	0/0	11	1	1449		TRUE
5	144454524	G	T	T	PASS	0/0	0/0	0/0	0/0	0/1	0/0	0/0	0/0	0/0	0/0	0/0	0/0	11	1	1450		TRUE
5	145390255	A	T	T	PASS	0/0	0/0	0/1	0/0	0/0	0/0	0/0	0/0	0/0	0/0	0/0	0/0	11	1	1451		TRUE
5	145592044	A	G	G	PASS	0/0	0/0	0/0	0/0	0/0	0/0	0/0	0/0	0/1	0/0	0/0	0/0	11	1	1452		TRUE
5	147138020	T	G	#N/A	#N/A	#N/A	#N/A	#N/A	#N/A	#N/A	#N/A	#N/A	#N/A	#N/A	#N/A	#N/A	#N/A	0	0	FALSE	FALSE	FALSE
5	148064412	A	G	G	PASS	0/0	0/0	0/0	0/0	0/0	0/0	0/0	0/0	0/1	0/0	0/0	0/0	11	1	1453		TRUE
5	148556511	G	A	A	PASS	0/0	0/0	0/0	0/0	0/1	0/0	0/0	0/0	0/0	0/0	0/0	0/0	11	1	1454		TRUE
5	148940549	G	C	C	PASS	0/0	0/0	0/1	0/0	0/0	0/0	0/0	0/0	0/0	0/0	0/0	0/0	11	1	1455		TRUE
6	3269052	A	C	C	PASS	0/0	0/0	0/0	0/0	0/0	0/0	0/1	0/0	0/0	0/0	0/0	0/0	11	1	1456		TRUE
6	3674663	T	G	G	PASS	0/0	0/0	0/0	0/0	0/0	0/0	0/0	0/0	0/1	0/0	0/0	0/0	11	1	1457		TRUE
6	3876851	A	C	C	PASS	0/1	0/0	0/0	0/0	0/0	0/0	0/0	0/0	0/0	0/0	0/0	0/0	11	1	1458		TRUE
6	6182017	G	T	T	PASS	0/0	0/0	0/0	0/1	0/0	0/0	0/0	0/0	0/0	0/0	0/0	0/0	11	1	1459		TRUE
6	6814973	T	A	#N/A	#N/A	#N/A	#N/A	#N/A	#N/A	#N/A	#N/A	#N/A	#N/A	#N/A	#N/A	#N/A	#N/A	0	0	FALSE	FALSE	FALSE
6	9960300	C	A	A	PASS	0/0	0/0	0/0	0/0	0/0	0/0	0/0	0/0	0/1	0/0	0/0	0/0	11	1	1460		TRUE
6	10156045	T	A	A	PASS	0/0	0/0	0/0	0/0	0/1	0/0	0/0	0/0	0/0	0/0	0/0	0/0	11	1	1461		TRUE
6	10201188	T	C	C	PASS	0/0	0/1	0/0	0/0	0/0	0/0	0/0	0/0	0/0	0/0	0/0	0/0	11	1	1462		TRUE
6	10694991	C	A	A	PASS	0/0	0/0	0/0	0/0	0/1	0/0	0/0	0/0	0/0	0/0	0/0	0/0	11	1	1463		TRUE
6	10728170	C	A	A	PASS	0/1	0/0	0/0	0/0	0/0	0/0	0/0	0/0	0/0	0/0	0/0	0/0	11	1	1464		TRUE
6	11025365	C	A	A	PASS	0/0	0/0	0/1	0/0	0/0	0/0	0/0	0/0	0/0	0/0	0/0	0/0	11	1	1465		TRUE
6	11091368	A	T	T	PASS	0/0	0/1	0/0	0/0	0/0	0/0	0/0	0/0	0/0	0/0	0/0	0/0	11	1	1466		TRUE
6	11662117	T	A	A	PASS	0/0	0/0	0/1	0/0	0/0	0/0	0/0	0/0	0/0	0/0	0/0	0/0	11	1	1467		TRUE
6	12108481	A	C	#N/A	#N/A	#N/A	#N/A	#N/A	#N/A	#N/A	#N/A	#N/A	#N/A	#N/A	#N/A	#N/A	#N/A	0	0	FALSE	TRUE	TRUE
6	12444633	G	T	T	PASS	0/0	0/0	0/0	0/1	0/0	0/0	0/0	0/0	0/0	0/0	0/0	0/0	11	1	1468		TRUE
6	14662664	A	G	G	PASS	0/1	0/0	0/0	0/0	0/0	0/0	0/0	0/0	0/0	0/0	0/0	0/0	11	1	1469		TRUE
6	14766756	A	G	G	PASS	0/0	0/0	0/0	0/0	0/0	0/1	0/0	0/0	0/0	0/0	0/0	0/0	11	1	1470		TRUE
6	15164936	T	C	C	PASS	0/0	0/0	0/0	0/0	0/0	0/0	0/0	0/1	0/0	0/0	0/0	0/0	11	1	1471		TRUE
6	19220233	A	T	T	PASS	0/0	0/0	0/0	0/0	0/0	0/1	0/0	0/0	0/0	0/0	0/0	0/0	11	1	1472		TRUE
6	20493216	A	G	G	PASS	0/0	0/0	0/0	0/0	0/0	0/1	0/0	0/0	0/0	0/0	0/0	0/0	11	1	1473		TRUE
6	20846855	C	T	T	PASS	0/1	0/0	0/0	0/0	0/0	0/0	0/0	0/0	0/0	0/0	0/0	0/0	11	1	1474		TRUE
6	21035560	C	A	A	PASS	0/0	0/0	0/0	0/0	0/0	0/0	0/0	0/0	0/1	0/0	0/0	0/0	11	1	1475		TRUE
6	21839430	A	G	G	PASS	0/0	0/0	0/0	0/0	0/0	0/0	0/0	0/0	0/0	0/0	0/1	0/0	11	1	1476		TRUE
6	22040418	G	T	#N/A	#N/A	#N/A	#N/A	#N/A	#N/A	#N/A	#N/A	#N/A	#N/A	#N/A	#N/A	#N/A	#N/A	0	0	FALSE	?	FALSE
6	23426416	G	A	A	PASS	0/1	0/0	0/0	0/0	0/0	0/0	0/0	0/0	0/0	0/0	0/0	0/0	11	1	1477		TRUE
6	24249909	G	A	A	PASS	0/0	0/1	0/0	0/0	0/0	0/0	0/0	0/0	0/0	0/0	0/0	0/0	11	1	1478		TRUE
6	25999429	C	A	A	PASS	0/0	0/0	0/0	0/0	0/0	0/0	0/0	0/0	0/0	0/0	0/1	0/0	11	1	1479		TRUE
6	26269460	G	A	A	PASS	0/0	0/0	0/1	0/0	0/0	0/0	0/0	0/0	0/0	0/0	0/0	0/0	11	1	1480		TRUE
6	26405397	G	A	A	PASS	0/0	0/0	0/0	0/0	0/0	0/0	0/1	0/0	0/0	0/0	0/0	0/0	11	1	1481		TRUE
6	26442410	G	A	A	PASS	0/0	0/0	0/0	0/1	0/0	0/0	0/0	0/0	0/0	0/0	0/0	0/0	11	1	1482		TRUE
6	26555375	C	G	G	PASS	0/0	0/0	0/0	0/0	0/0	0/0	0/0	0/0	0/0	0/0	0/0	0/1	11	1	1483		TRUE
6	26645872	T	A	A	PASS	0/0	0/0	0/0	0/0	0/1	0/0	0/0	0/0	0/0	0/0	0/0	0/0	11	1	1484		TRUE
6	27347644	G	T	T	PASS	0/0	0/0	0/1	0/0	0/0	0/0	0/0	0/0	0/0	0/0	0/0	0/0	11	1	1485		TRUE
6	29389726	G	T	T	PASS	0/0	0/0	0/0	0/0	0/0	0/0	0/0	0/1	0/0	0/0	0/0	0/0	11	1	1486		TRUE
6	31610971	G	A	A	PASS	0/0	0/0	0/0	0/0	0/0	0/0	0/0	0/0	0/1	0/0	0/0	0/0	11	1	1487		TRUE
6	32721562	T	A	A	PASS	0/0	0/0	0/1	0/0	0/0	0/0	0/0	0/0	0/0	0/0	0/0	0/0	11	1	1488		TRUE
6	33082019	C	T	T	PASS	0/0	0/0	0/0	0/0	0/1	0/0	0/0	0/0	0/0	0/0	0/0	0/0	11	1	1489		TRUE
6	33336832	G	T	T	PASS	0/1	0/0	0/0	0/0	0/0	0/0	0/0	0/0	0/0	0/0	0/0	0/0	11	1	1490		TRUE
6	33755693	C	A	A	PASS	0/1	0/0	0/0	0/0	0/0	0/0	0/0	0/0	0/0	0/0	0/0	0/0	11	1	1491		TRUE
6	34447842	C	A	A	PASS	0/0	0/0	0/0	0/0	0/0	0/1	0/0	0/0	0/0	0/0	0/0	0/0	11	1	1492		TRUE
6	34775953	G	T	T	PASS	0/0	0/0	0/0	0/0	0/0	0/0	0/0	0/1	0/0	0/0	0/0	0/0	11	1	1493		TRUE
6	35535565	A	G	G	PASS	0/0	0/0	0/0	0/1	0/0	0/0	0/0	0/0	0/0	0/0	0/0	0/0	11	1	1494		TRUE
6	35582217	G	T	T	PASS	0/0	0/0	0/0	0/0	0/0	0/0	0/0	0/1	0/0	0/0	0/0	0/0	11	1	1495		TRUE
6	35831172	C	G	G	PASS	0/0	0/0	0/0	0/0	0/0	0/0	0/0	0/0	0/0	0/0	0/1	0/0	11	1	1496		TRUE
6	36321894	G	T	T	PASS	0/0	0/0	0/0	0/0	0/0	0/0	0/0	0/0	0/1	0/0	0/0	0/0	11	1	1497		TRUE
6	36328798	C	A	A	PASS	0/1	0/0	0/0	0/0	0/0	0/0	0/0	0/0	0/0	0/0	0/0	0/0	11	1	1498		TRUE
6	36852876	C	T	T	PASS	0/0	0/1	0/0	0/0	0/0	0/0	0/0	0/0	0/0	0/0	0/0	0/0	11	1	1499		TRUE
6	37274473	G	A	A	PASS	0/0	0/0	0/1	0/0	0/0	0/0	0/0	0/0	0/0	0/0	0/0	0/0	11	1	1500		TRUE
6	37386040	G	T	T	PASS	0/0	0/0	0/0	0/0	0/0	0/1	0/0	0/0	0/0	0/0	0/0	0/0	11	1	1501		TRUE
6	39181970	C	T	T	PASS	0/1	0/0	0/0	0/0	0/0	0/0	0/0	0/0	0/0	0/0	0/0	0/0	11	1	1502		TRUE
6	40702129	C	T	T	PASS	0/0	0/0	0/0	0/0	0/0	0/0	0/0	0/1	0/0	0/0	0/0	0/0	11	1	1503		TRUE
6	41227401	G	T	T	PASS	0/0	0/0	0/0	0/0	0/0	0/1	0/0	0/0	0/0	0/0	0/0	0/0	11	1	1504		TRUE
6	42179704	G	A	A	PASS	0/0	0/0	0/1	0/0	0/0	0/0	0/0	0/0	0/0	0/0	0/0	0/0	11	1	1505		TRUE
6	43498134	G	A	A	PASS	0/0	0/0	0/0	0/0	0/0	0/0	0/0	0/0	0/0	0/0	0/1	0/0	11	1	1506		TRUE
6	43909879	G	C	#N/A	#N/A	#N/A	#N/A	#N/A	#N/A	#N/A	#N/A	#N/A	#N/A	#N/A	#N/A	#N/A	#N/A	0	0	FALSE	FALSE	FALSE
6	44291756	A	T	T	PASS	0/0	0/1	0/0	0/0	0/0	0/0	0/0	0/0	0/0	0/0	0/0	0/0	11	1	1507		TRUE
6	45264766	T	C	C	PASS	0/0	0/0	0/0	0/0	0/1	0/0	0/0	0/0	0/0	0/0	0/0	0/0	11	1	1508		TRUE
6	45350948	T	A	A	PASS	0/1	0/0	0/0	0/0	0/0	0/0	0/0	0/0	0/0	0/0	0/0	0/0	11	1	1509		TRUE
6	45542559	C	T	T	PASS	0/0	0/0	0/0	0/0	0/0	0/0	0/0	0/0	0/0	0/0	0/1	0/0	11	1	1510		TRUE
6	45605745	G	T	T	PASS	0/0	0/0	0/0	0/0	0/0	0/0	0/0	0/1	0/0	0/0	0/0	0/0	11	1	1511		TRUE
6	46486001	A	T	T	PASS	0/0	0/0	0/1	0/0	0/0	0/0	0/0	0/0	0/0	0/0	0/0	0/0	11	1	1512		TRUE
6	49055563	G	A	A	PASS	0/0	0/0	0/0	0/0	0/0	0/0	0/0	0/1	0/0	0/0	0/0	0/0	11	1	1513		TRUE
6	50687557	A	G	G	PASS	0/0	0/0	0/0	0/0	0/0	0/1	0/0	0/0	0/0	0/0	0/0	0/0	11	1	1514		TRUE
6	52244780	G	T	T	PASS	0/1	0/0	0/0	0/0	0/0	0/0	0/0	0/0	0/0	0/0	0/0	0/0	11	1	1515		TRUE
6	53444547	C	A	A	PASS	0/0	0/0	0/0	0/0	0/0	0/0	0/0	0/0	0/1	0/0	0/0	0/0	11	1	1516		TRUE
6	53871407	G	A	A	PASS	0/0	0/0	0/0	0/0	0/1	0/0	0/0	0/0	0/0	0/0	0/0	0/0	11	1	1517		TRUE
6	55275283	C	T	T	PASS	0/0	0/1	0/0	0/0	0/0	0/0	0/0	0/0	0/0	0/0	0/0	0/0	11	1	1518		TRUE
6	55838548	G	T	T	PASS	0/0	0/0	0/0	0/1	0/0	0/0	0/0	0/0	0/0	0/0	0/0	0/0	11	1	1519		TRUE
6	56414189	G	A	A	PASS	0/1	0/0	0/0	0/0	0/0	0/0	0/0	0/0	0/0	0/0	0/0	0/0	11	1	1520		TRUE
6	56524030	C	A	A	PASS	0/0	0/0	0/0	0/0	0/0	0/1	0/0	0/0	0/0	0/0	0/0	0/0	11	1	1521		TRUE
6	56813258	G	T	T	PASS	0/0	0/1	0/0	0/0	0/0	0/0	0/0	0/0	0/0	0/0	0/0	0/0	11	1	1522		TRUE
6	57354909	G	T	T	PASS	0/0	0/0	0/0	0/0	0/0	0/1	0/0	0/0	0/0	0/0	0/0	0/0	11	1	1523		TRUE
6	57915130	C	A	A	PASS	0/0	0/0	0/0	0/0	0/1	0/0	0/0	0/0	0/0	0/0	0/0	0/0	11	1	1524		TRUE
6	60329539	C	T	T	PASS	0/0	0/0	0/0	0/0	0/0	0/0	0/0	0/1	0/0	0/0	0/0	0/0	11	1	1525		TRUE
6	60605367	G	T	T	PASS	0/1	0/0	0/0	0/0	0/0	0/0	0/0	0/0	0/0	0/0	0/0	0/0	11	1	1526		TRUE
6	61203420	G	T	T	PASS	0/0	0/0	0/0	0/0	0/0	0/0	0/1	0/0	0/0	0/0	0/0	0/0	11	1	1527		TRUE
6	61406349	G	T	T	PASS	0/1	0/0	0/0	0/0	0/0	0/0	0/0	0/0	0/0	0/0	0/0	0/0	11	1	1528		TRUE
6	62031490	G	T	T	PASS	0/1	0/0	0/0	0/0	0/0	0/0	0/0	0/0	0/0	0/0	0/0	0/0	11	1	1529		TRUE
6	62264654	G	T	T	PASS	0/0	0/0	0/1	0/0	0/0	0/0	0/0	0/0	0/0	0/0	0/0	0/0	11	1	1530		TRUE
6	62552553	A	G	G	PASS	0/0	0/0	0/0	0/0	0/0	0/0	0/0	0/1	0/0	0/0	0/0	0/0	11	1	1531		TRUE
6	62736920	T	A	A	PASS	0/1	0/0	0/0	0/0	0/0	0/0	0/0	0/0	0/0	0/0	0/0	0/0	11	1	1532		TRUE
6	62813500	A	G	G	PASS	0/0	0/0	0/0	0/0	0/0	0/0	0/0	0/1	0/0	0/0	0/0	0/0	11	1	1533		TRUE
6	62835136	C	A	A	PASS	0/0	0/0	0/0	0/0	0/0	0/1	0/0	0/0	0/0	0/0	0/0	0/0	11	1	1534		TRUE
6	63383731	G	T	T	PASS	0/0	0/1	0/0	0/0	0/0	0/0	0/0	0/0	0/0	0/0	0/0	0/0	11	1	1535		TRUE
6	63430833	G	C	C	PASS	0/0	0/0	0/0	0/0	0/0	0/0	0/0	0/0	0/0	0/0	0/1	0/0	11	1	1536		TRUE
6	63540672	C	A	A	PASS	0/1	0/0	0/0	0/0	0/0	0/0	0/0	0/0	0/0	0/0	0/0	0/0	11	1	1537		TRUE
6	63586855	G	T	T	PASS	0/0	0/0	0/1	0/0	0/0	0/0	0/0	0/0	0/0	0/0	0/0	0/0	11	1	1538		TRUE
6	63804908	A	C	C	PASS	0/0	0/0	0/1	0/0	0/0	0/0	0/0	0/0	0/0	0/0	0/0	0/0	11	1	1539		TRUE
6	63842101	G	T	T	PASS	0/0	0/0	0/1	0/0	0/0	0/0	0/0	0/0	0/0	0/0	0/0	0/0	11	1	1540		TRUE
6	64006569	G	T	T	PASS	0/0	0/0	0/0	0/1	0/0	0/0	0/0	0/0	0/0	0/0	0/0	0/0	11	1	1541		TRUE
6	64515264	G	T	T	PASS	0/0	0/0	0/0	0/0	0/0	0/0	0/0	0/0	0/0	0/0	0/1	0/0	11	1	1542		TRUE
6	64692923	T	A	A	PASS	0/0	0/0	0/0	0/0	0/1	0/0	0/0	0/0	0/0	0/0	0/0	0/0	11	1	1543		TRUE
6	64872359	G	T	T	PASS	0/0	0/0	0/1	0/0	0/0	0/0	0/0	0/0	0/0	0/0	0/0	0/0	11	1	1544		TRUE
6	65181369	A	T	T	PASS	0/0	0/0	0/0	0/0	0/1	0/0	0/0	0/0	0/0	0/0	0/0	0/0	11	1	1545		TRUE
6	65753875	C	A	A	PASS	0/0	0/0	0/0	0/0	0/1	0/0	0/0	0/0	0/0	0/0	0/0	0/0	11	1	1546		TRUE
6	65790798	A	T	T	PASS	0/0	0/0	0/0	0/0	0/1	0/0	0/0	0/0	0/0	0/0	0/0	0/0	11	1	1547		TRUE
6	66079539	G	T	T	PASS	0/0	0/0	0/0	0/0	0/1	0/0	0/0	0/0	0/0	0/0	0/0	0/0	11	1	1548		TRUE
6	66671243	C	T	T	PASS	0/0	0/0	0/0	0/0	0/0	0/1	0/0	0/0	0/0	0/0	0/0	0/0	11	1	1549		TRUE
6	67180927	T	C	C	PASS	0/0	0/1	0/0	0/0	0/0	0/0	0/0	0/0	0/0	0/0	0/0	0/0	11	1	1550		TRUE
6	67563330	G	A	A	PASS	0/0	0/0	0/1	0/0	0/0	0/0	0/0	0/0	0/0	0/0	0/0	0/0	11	1	1551		TRUE
6	67719577	A	T	T	PASS	0/1	0/0	0/0	0/0	0/0	0/0	0/0	0/0	0/0	0/0	0/0	0/0	11	1	1552		TRUE
6	68068462	A	G	G	PASS	0/0	0/0	0/0	0/0	0/0	0/0	0/0	0/0	0/1	0/0	0/0	0/0	11	1	1553		TRUE
6	68746036	T	A	A	SNP_LowQualityDepth	0/0	0/0	0/1	0/0	0/0	0/0	0/0	0/0	0/0	0/0	0/0	0/0	11	1	FALSE	TRUE	TRUE
6	68867082	C	T	T	PASS	0/0	0/0	0/0	0/0	0/0	0/0	0/0	0/0	0/1	0/0	0/0	0/0	11	1	1554		TRUE
6	68889009	C	T	T	PASS	0/0	0/0	0/1	0/0	0/0	0/0	0/0	0/0	0/0	0/0	0/0	0/0	11	1	1555		TRUE
6	68914490	G	T	T	PASS	0/0	0/0	0/0	0/1	0/0	0/0	0/0	0/0	0/0	0/0	0/0	0/0	11	1	1556		TRUE
6	69053039	C	G	G	PASS	0/0	0/0	0/1	0/0	0/0	0/0	0/0	0/0	0/0	0/0	0/0	0/0	11	1	1557		TRUE
6	69066371	G	C	C	PASS	0/1	0/0	0/0	0/0	0/0	0/0	0/0	0/0	0/0	0/0	0/0	0/0	11	1	1558		TRUE
6	69878798	G	C	C	PASS	0/0	0/0	0/0	0/0	0/0	0/0	0/1	0/0	0/0	0/0	0/0	0/0	11	1	1559		TRUE
6	69893344	C	T	T	PASS	0/0	0/0	0/0	0/0	0/1	0/0	0/0	0/0	0/0	0/0	0/0	0/0	11	1	1560		TRUE
6	70493027	C	A	A	PASS	0/1	0/0	0/0	0/0	0/0	0/0	0/0	0/0	0/0	0/0	0/0	0/0	11	1	1561		TRUE
6	70741839	A	T	T	PASS	0/0	0/0	0/0	0/0	0/1	0/0	0/0	0/0	0/0	0/0	0/0	0/0	11	1	1562		TRUE
6	71083711	C	A	A	PASS	0/0	0/0	0/0	0/0	0/1	0/0	0/0	0/0	0/0	0/0	0/0	0/0	11	1	1563		TRUE
6	72200308	C	G	G	PASS	0/0	0/0	0/0	0/0	0/0	0/0	0/0	0/0	0/0	0/0	0/1	0/0	11	1	1564		TRUE
6	73521165	G	T	T	PASS	0/0	0/0	0/0	0/1	0/0	0/0	0/0	0/0	0/0	0/0	0/0	0/0	11	1	1565		TRUE
6	73937958	A	C	C	PASS	0/0	0/0	0/0	0/0	0/0	0/1	0/0	0/0	0/0	0/0	0/0	0/0	11	1	1566		TRUE
6	74312420	G	C	C	PASS	0/1	0/0	0/0	0/0	0/0	0/0	0/0	0/0	0/0	0/0	0/0	0/0	11	1	1567		TRUE
6	74722284	A	C	C	PASS	0/0	0/0	0/0	0/1	0/0	0/0	0/0	0/0	0/0	0/0	0/0	0/0	11	1	1568		TRUE
6	74968496	T	G	G	PASS	0/0	0/0	0/1	0/0	0/0	0/0	0/0	0/0	0/0	0/0	0/0	0/0	11	1	1569		TRUE
6	74985485	G	T	T	PASS	0/1	0/0	0/0	0/0	0/0	0/0	0/0	0/0	0/0	0/0	0/0	0/0	11	1	1570		TRUE
6	75258058	T	C	C	PASS	0/0	0/0	0/0	0/0	0/1	0/0	0/0	0/0	0/0	0/0	0/0	0/0	11	1	1571		TRUE
6	75488978	T	A	A	PASS	0/0	0/0	0/0	0/1	0/0	0/0	0/0	0/0	0/0	0/0	0/0	0/0	11	1	1572		TRUE
6	75605146	G	T	T	PASS	0/0	0/0	0/0	0/0	0/0	0/1	0/0	0/0	0/0	0/0	0/0	0/0	11	1	1573		TRUE
6	75720420	T	C	C	PASS	0/0	0/0	0/1	0/0	0/0	0/0	0/0	0/0	0/0	0/0	0/0	0/0	11	1	1574		TRUE
6	76097656	C	A	A	PASS	0/1	0/0	0/0	0/0	0/0	0/0	0/0	0/0	0/0	0/0	0/0	0/0	11	1	1575		TRUE
6	76389350	C	T	T	PASS	0/0	0/1	0/0	0/0	0/0	0/0	0/0	0/0	0/0	0/0	0/0	0/0	11	1	1576		TRUE
6	76417438	A	G	G	PASS	0/0	0/0	0/0	0/0	0/1	0/0	0/0	0/0	0/0	0/0	0/0	0/0	11	1	1577		TRUE
6	76480742	G	T	#N/A	#N/A	#N/A	#N/A	#N/A	#N/A	#N/A	#N/A	#N/A	#N/A	#N/A	#N/A	#N/A	#N/A	0	0	FALSE	FALSE	FALSE
6	76555097	A	G	G	PASS	0/0	0/0	0/0	0/1	0/0	0/0	0/0	0/0	0/0	0/0	0/0	0/0	11	1	1578		TRUE
6	76582635	C	A	A	PASS	0/0	0/0	0/0	0/0	0/1	0/0	0/0	0/0	0/0	0/0	0/0	0/0	11	1	1579		TRUE
6	76822228	A	T	T	PASS	0/0	0/0	0/0	0/0	0/0	0/0	0/0	0/0	0/0	0/0	0/1	0/0	11	1	1580		TRUE
6	76839474	C	A	A	PASS	0/0	0/0	0/0	0/0	0/1	0/0	0/0	0/0	0/0	0/0	0/0	0/0	11	1	1581		TRUE
6	76856566	T	A	A	PASS	0/0	0/0	0/0	0/0	0/0	0/0	0/1	0/0	0/0	0/0	0/0	0/0	11	1	1582		TRUE
6	77068781	G	T	T	PASS	0/0	0/0	0/0	0/0	0/0	0/0	0/0	0/0	0/0	0/0	0/0	0/1	11	1	1583		TRUE
6	77377426	C	T	T	PASS	0/0	0/0	0/0	0/0	0/0	0/0	0/0	0/0	0/0	0/0	0/1	0/0	11	1	1584		TRUE
6	77772938	T	A	A	PASS	0/0	0/0	0/1	0/0	0/0	0/0	0/0	0/0	0/0	0/0	0/0	0/0	11	1	1585		TRUE
6	78536148	C	A	A	PASS	0/0	0/0	0/0	0/0	0/0	0/0	0/0	0/0	0/0	0/0	0/0	0/1	11	1	1586		TRUE
6	78557932	C	G	G	PASS	0/0	0/0	0/0	0/0	0/0	0/0	0/0	0/0	0/1	0/0	0/0	0/0	11	1	1587		TRUE
6	79351458	A	T	T	PASS	0/1	0/0	0/0	0/0	0/0	0/0	0/0	0/0	0/0	0/0	0/0	0/0	11	1	1588		TRUE
6	79711023	G	C	C	PASS	0/0	0/0	0/0	0/1	0/0	0/0	0/0	0/0	0/0	0/0	0/0	0/0	11	1	1589		TRUE
6	79757980	C	A	A	PASS	0/0	0/0	0/0	0/0	0/0	0/0	0/0	0/0	0/0	0/0	0/0	0/1	11	1	1590		TRUE
6	79960170	C	T	T	PASS	0/0	0/0	0/0	0/0	0/0	0/0	0/0	0/0	0/0	0/0	0/0	0/1	11	1	1591		TRUE
6	80162844	T	A	A	PASS	0/0	0/0	0/1	0/0	0/0	0/0	0/0	0/0	0/0	0/0	0/0	0/0	11	1	1592		TRUE
6	80300157	A	T	T	PASS	0/1	0/0	0/0	0/0	0/0	0/0	0/0	0/0	0/0	0/0	0/0	0/0	11	1	1593		TRUE
6	80574886	G	A	A	PASS	0/0	0/0	0/0	0/0	0/0	0/0	0/0	0/0	0/0	0/0	0/1	0/0	11	1	1594		TRUE
6	80583363	C	T	T	PASS	0/0	0/0	0/0	0/1	0/0	0/0	0/0	0/0	0/0	0/0	0/0	0/0	11	1	1595		TRUE
6	80753847	T	A	A	PASS	0/0	0/0	0/0	0/0	0/0	0/0	0/0	0/0	0/0	0/0	0/1	0/0	11	1	1596		TRUE
6	80767130	C	G	G	PASS	0/0	0/0	0/0	0/0	0/0	0/0	0/1	0/0	0/0	0/0	0/0	0/0	11	1	1597		TRUE
6	81079075	T	C	C	PASS	0/0	0/1	0/0	0/0	0/0	0/0	0/0	0/0	0/0	0/0	0/0	0/0	11	1	1598		TRUE
6	81098975	G	A	A	PASS	0/0	0/0	0/0	0/0	0/0	0/0	0/0	0/0	0/0	0/0	0/0	0/1	11	1	1599		TRUE
6	83009232	T	G	G	PASS	0/0	0/0	0/1	0/0	0/0	0/0	0/0	0/0	0/0	0/0	0/0	0/0	11	1	1600		TRUE
6	83037853	G	A	A	PASS	0/0	0/0	0/0	0/1	0/0	0/0	0/0	0/0	0/0	0/0	0/0	0/0	11	1	1601		TRUE
6	83141292	G	A	A	PASS	0/1	0/0	0/0	0/0	0/0	0/0	0/0	0/0	0/0	0/0	0/0	0/0	11	1	1602		TRUE
6	87226395	C	G	G	PASS	0/0	0/0	0/0	0/0	0/1	0/0	0/0	0/0	0/0	0/0	0/0	0/0	11	1	1603		TRUE
6	88372711	A	T	T	PASS	0/0	0/0	0/0	0/0	0/1	0/0	0/0	0/0	0/0	0/0	0/0	0/0	11	1	1604		TRUE
6	88743122	C	T	T	PASS	0/0	0/0	0/0	0/0	0/1	0/0	0/0	0/0	0/0	0/0	0/0	0/0	11	1	1605		TRUE
6	91704117	C	G	G	PASS	0/0	0/0	0/1	0/0	0/0	0/0	0/0	0/0	0/0	0/0	0/0	0/0	11	1	1606		TRUE
6	93157416	G	T	T	PASS	0/0	0/0	0/0	0/0	0/0	0/0	0/0	0/0	0/1	0/0	0/0	0/0	11	1	1607		TRUE
6	94151059	G	T	T	PASS	0/0	0/0	0/0	0/0	0/0	0/0	0/0	0/1	0/0	0/0	0/0	0/0	11	1	1608		TRUE
6	95329262	C	G	G	PASS	0/1	0/0	0/0	0/0	0/0	0/0	0/0	0/0	0/0	0/0	0/0	0/0	11	1	1609		TRUE
6	95469913	G	A	A	PASS	0/0	0/0	0/0	0/0	0/0	0/0	0/0	0/0	0/1	0/0	0/0	0/0	11	1	1610		TRUE
6	95857206	A	T	T	PASS	0/0	0/0	0/1	0/0	0/0	0/0	0/0	0/0	0/0	0/0	0/0	0/0	11	1	1611		TRUE
6	96011141	G	A	G,ACA	INDEL_LowQualityDepth	0/0	0/1	0/1	0/1	0/0	0/0	0/0	0/2	0/1	0/1	0/0	0/1	5	0	FALSE	?	FALSE
6	96122370	C	T	T	PASS	0/0	0/0	0/0	0/0	0/0	0/0	0/1	0/0	0/0	0/0	0/0	0/0	11	1	1612		TRUE
6	96242877	G	T	T	PASS	0/0	0/0	0/0	0/0	0/1	0/0	0/0	0/0	0/0	0/0	0/0	0/0	11	1	1613		TRUE
6	97109314	C	A	A	PASS	0/1	0/0	0/0	0/0	0/0	0/0	0/0	0/0	0/0	0/0	0/0	0/0	11	1	1614		TRUE
6	98384664	C	T	T	PASS	0/1	0/0	0/0	0/0	0/0	0/0	0/0	0/0	0/0	0/0	0/0	0/0	11	1	1615		TRUE
6	98482932	A	T	T	PASS	0/0	0/0	0/1	0/0	0/0	0/0	0/0	0/0	0/0	0/0	0/0	0/0	11	1	1616		TRUE
6	99203888	A	G	G	PASS	0/0	0/0	0/1	0/0	0/0	0/0	0/0	0/0	0/0	0/0	0/0	0/0	11	1	1617		TRUE
6	101030520	C	T	T	PASS	0/0	0/0	0/0	0/0	0/0	0/1	0/0	0/0	0/0	0/0	0/0	0/0	11	1	1618		TRUE
6	101069172	G	C	C	PASS	0/1	0/0	0/0	0/0	0/0	0/0	0/0	0/0	0/0	0/0	0/0	0/0	11	1	1619		TRUE
6	101591490	G	T	T	PASS	0/0	0/0	0/0	0/1	0/0	0/0	0/0	0/0	0/0	0/0	0/0	0/0	11	1	1620		TRUE
6	102266670	A	T	T	PASS	0/0	0/0	0/0	0/0	0/0	0/1	0/0	0/0	0/0	0/0	0/0	0/0	11	1	1621		TRUE
6	102618426	A	T	T	PASS	0/0	0/0	0/0	0/0	0/1	0/0	0/0	0/0	0/0	0/0	0/0	0/0	11	1	1622		TRUE
6	103086593	T	A	A	PASS	0/0	0/0	0/0	0/0	0/0	0/0	0/0	0/1	0/0	0/0	0/0	0/0	11	1	1623		TRUE
6	103161041	G	A	A	PASS	0/0	0/0	0/0	0/0	0/1	0/0	0/0	0/0	0/0	0/0	0/0	0/0	11	1	1624		TRUE
6	103190443	C	A	A	PASS	0/0	0/0	0/0	0/0	0/0	0/0	0/0	0/1	0/0	0/0	0/0	0/0	11	1	1625		TRUE
6	103434891	C	A	A	PASS	0/0	0/1	0/0	0/0	0/0	0/0	0/0	0/0	0/0	0/0	0/0	0/0	11	1	1626		TRUE
6	103694139	A	G	G	PASS	0/0	0/0	0/0	0/0	0/0	0/0	0/0	0/0	0/0	0/0	0/1	0/0	11	1	1627		TRUE
6	103851723	G	T	T	PASS	0/0	0/0	0/1	0/0	0/0	0/0	0/0	0/0	0/0	0/0	0/0	0/0	11	1	1628		TRUE
6	104033742	G	T	T	PASS	0/0	0/0	0/0	0/0	0/0	0/0	0/0	0/0	0/1	0/0	0/0	0/0	11	1	1629		TRUE
6	104252409	G	T	T	PASS	0/1	0/0	0/0	0/0	0/0	0/0	0/0	0/0	0/0	0/0	0/0	0/0	11	1	1630		TRUE
6	104928356	A	G	G	PASS	0/0	0/0	0/0	0/0	0/0	0/1	0/0	0/0	0/0	0/0	0/0	0/0	11	1	1631		TRUE
6	105698075	C	T	T	PASS	0/0	0/0	0/0	0/0	0/0	0/0	0/0	0/1	0/0	0/0	0/0	0/0	11	1	1632		TRUE
6	105720240	A	C	C	PASS	0/0	0/0	0/1	0/0	0/0	0/0	0/0	0/0	0/0	0/0	0/0	0/0	11	1	1633		TRUE
6	105960670	C	T	T	PASS	0/0	0/1	0/0	0/0	0/0	0/0	0/0	0/0	0/0	0/0	0/0	0/0	11	1	1634		TRUE
6	105981766	C	A	A	PASS	0/1	0/0	0/0	0/0	0/0	0/0	0/0	0/0	0/0	0/0	0/0	0/0	11	1	1635		TRUE
6	106099894	T	C	C	PASS	0/0	0/0	0/0	0/0	0/1	0/0	0/0	0/0	0/0	0/0	0/0	0/0	11	1	1636		TRUE
6	106239212	C	A	A	PASS	0/0	0/0	0/0	0/1	0/0	0/0	0/0	0/0	0/0	0/0	0/0	0/0	11	1	1637		TRUE
6	106464153	C	A	A	PASS	0/0	0/0	0/1	0/0	0/0	0/0	0/0	0/0	0/0	0/0	0/0	0/0	11	1	1638		TRUE
6	106602125	T	C	C	PASS	0/0	0/0	0/0	0/0	0/0	0/0	0/0	0/0	0/0	0/0	0/1	0/0	11	1	1639		TRUE
6	106841774	A	C	C	SnpCluster	0/0	0/0	0/0	0/0	0/0	0/0	0/0	0/0	0/0	0/0	0/1	0/0	11	1	FALSE	TRUE	TRUE
6	107154610	T	G	#N/A	#N/A	#N/A	#N/A	#N/A	#N/A	#N/A	#N/A	#N/A	#N/A	#N/A	#N/A	#N/A	#N/A	0	0	FALSE	FALSE	FALSE
6	107806440	T	A	A	PASS	0/1	0/0	0/0	0/0	0/0	0/0	0/0	0/0	0/0	0/0	0/0	0/0	11	1	1640		TRUE
6	108080294	C	G	G	PASS	0/1	0/0	0/0	0/0	0/0	0/0	0/0	0/0	0/0	0/0	0/0	0/0	11	1	1641		TRUE
6	109379238	G	A	A	PASS	0/1	0/0	0/0	0/0	0/0	0/0	0/0	0/0	0/0	0/0	0/0	0/0	11	1	1642		TRUE
6	109731712	C	A	A	PASS	0/0	0/0	0/0	0/0	0/1	0/0	0/0	0/0	0/0	0/0	0/0	0/0	11	1	1643		TRUE
6	109822665	A	T	T	PASS	0/0	0/0	0/0	0/0	0/1	0/0	0/0	0/0	0/0	0/0	0/0	0/0	11	1	1644		TRUE
6	110663388	A	T	T	PASS	0/0	0/1	0/0	0/0	0/0	0/0	0/0	0/0	0/0	0/0	0/0	0/0	11	1	1645		TRUE
6	110973084	C	T	T	PASS	0/0	0/1	0/0	0/0	0/0	0/0	0/0	0/0	0/0	0/0	0/0	0/0	11	1	1646		TRUE
6	111093319	C	T	T	PASS	0/0	0/0	0/0	0/0	0/0	0/0	0/0	0/0	0/0	0/0	0/0	0/1	11	1	1647		TRUE
6	111248250	C	T	T	PASS	0/0	0/1	0/0	0/0	0/0	0/0	0/0	0/0	0/0	0/0	0/0	0/0	11	1	1648		TRUE
6	111572729	C	A	A	PASS	0/0	0/1	0/0	0/0	0/0	0/0	0/0	0/0	0/0	0/0	0/0	0/0	11	1	1649		TRUE
6	111602149	C	A	A	PASS	0/0	0/0	0/0	0/1	0/0	0/0	0/0	0/0	0/0	0/0	0/0	0/0	11	1	1650		TRUE
6	111610726	A	G	G	PASS	0/0	0/0	0/1	0/0	0/0	0/0	0/0	0/0	0/0	0/0	0/0	0/0	11	1	1651		TRUE
6	111610727	A	G	G	PASS	0/0	0/0	0/1	0/0	0/0	0/0	0/0	0/0	0/0	0/0	0/0	0/0	11	1	1652		TRUE
6	111702744	T	A	A	PASS	0/0	0/0	0/1	0/0	0/0	0/0	0/0	0/0	0/0	0/0	0/0	0/0	11	1	1653		TRUE
6	112440755	G	T	T	PASS	0/0	0/0	0/1	0/0	0/0	0/0	0/0	0/0	0/0	0/0	0/0	0/0	11	1	1654		TRUE
6	115212453	C	T	T	PASS	0/0	0/0	0/0	0/0	0/0	0/0	0/0	0/0	0/0	0/0	0/0	0/1	11	1	1655		TRUE
6	115935379	G	T	T	PASS	0/0	0/0	0/0	0/0	0/0	0/0	0/0	0/1	0/0	0/0	0/0	0/0	11	1	1656		TRUE
6	116403190	T	G	G	PASS	0/0	0/0	0/0	0/0	0/1	0/0	0/0	0/0	0/0	0/0	0/0	0/0	11	1	1657		TRUE
6	116403191	C	A	A	PASS	0/0	0/0	0/0	0/0	0/1	0/0	0/0	0/0	0/0	0/0	0/0	0/0	11	1	1658		TRUE
6	116822814	G	A	A	PASS	0/0	0/1	0/0	0/0	0/0	0/0	0/0	0/0	0/0	0/0	0/0	0/0	11	1	1659		TRUE
6	116940421	A	C	C,*	SNP_LowQualityDepth	0/2	0/1	0/2	0/2	0/1	0/2	0/1	0/1	0/2	0/1	0/1	0/0	1	0	FALSE	?	FALSE
6	119233875	C	A	A	PASS	0/0	0/0	0/0	0/0	0/0	0/0	0/0	0/1	0/0	0/0	0/0	0/0	11	1	1660		TRUE
6	119723291	G	A	A	PASS	0/0	0/0	0/1	0/0	0/0	0/0	0/0	0/0	0/0	0/0	0/0	0/0	11	1	1661		TRUE
6	121896456	A	C	C	PASS	0/0	0/0	0/0	0/0	0/0	0/0	0/0	0/1	0/0	0/1	0/0	0/0	10	1	FALSE	?	FALSE
6	122226116	T	A	A	PASS	0/0	0/0	0/0	0/1	0/0	0/0	0/0	0/0	0/0	0/0	0/0	0/0	11	1	1662		TRUE
6	122299773	C	A	A	PASS	0/0	0/0	0/0	0/0	0/0	0/0	0/0	0/0	0/1	0/0	0/0	0/0	11	1	1663		TRUE
6	123064633	C	A	A	PASS	0/0	0/0	0/1	0/0	0/0	0/0	0/0	0/0	0/0	0/0	0/0	0/0	11	1	1664		TRUE
6	123175361	G	T	T	PASS	0/0	0/0	0/1	0/0	0/0	0/0	0/0	0/0	0/0	0/0	0/0	0/0	11	1	1665		TRUE
6	123260272	G	T	T	PASS	0/0	0/0	0/0	0/0	0/1	0/0	0/0	0/0	0/0	0/0	0/0	0/0	11	1	1666		TRUE
6	124624150	T	C	C	PASS	0/0	0/0	0/0	0/0	0/1	0/0	0/0	0/0	0/0	0/0	0/0	0/0	11	1	1667		TRUE
6	125369317	C	A	A	PASS	0/1	0/0	0/0	0/0	0/0	0/0	0/0	0/0	0/0	0/0	0/0	0/0	11	1	1668		TRUE
6	125902572	C	A	A	PASS	0/0	0/0	0/0	0/0	0/0	0/1	0/0	0/0	0/0	0/0	0/0	0/0	11	1	1669		TRUE
6	126377616	G	A	A	PASS	0/0	0/0	0/0	0/0	0/1	0/0	0/0	0/0	0/0	0/0	0/0	0/0	11	1	1670		TRUE
6	126843572	C	A	A	PASS	0/1	0/0	0/0	0/0	0/0	0/0	0/0	0/0	0/0	0/0	0/0	0/0	11	1	1671		TRUE
6	127394281	C	A	A	PASS	0/0	0/0	0/0	0/0	0/0	0/0	0/0	0/0	0/0	0/0	0/1	0/0	11	1	1672		TRUE
6	128024827	G	T	T	PASS	0/0	0/0	0/0	0/0	0/0	0/1	0/0	0/0	0/0	0/0	0/0	0/0	11	1	1673		TRUE
6	128411010	G	T	T	PASS	0/0	0/0	0/0	0/0	0/0	0/0	0/0	0/1	0/0	0/0	0/0	0/0	11	1	1674		TRUE
6	128874985	G	A	A	PASS	0/0	0/0	0/0	0/0	0/1	0/0	0/0	0/0	0/0	0/0	0/0	0/0	11	1	1675		TRUE
6	132215288	G	A	A	PASS	0/0	0/0	0/0	0/1	0/0	0/0	0/0	0/0	0/0	0/0	0/0	0/0	11	1	1676		TRUE
6	132389464	G	T	T	PASS	0/1	0/0	0/0	0/0	0/0	0/0	0/0	0/0	0/0	0/0	0/0	0/0	11	1	1677		TRUE
6	132508857	C	A	A	PASS	0/1	0/0	0/0	0/0	0/0	0/0	0/0	0/0	0/0	0/0	0/0	0/0	11	1	1678		TRUE
6	134375933	A	G	G	PASS	0/0	0/0	0/0	0/0	0/1	0/0	0/0	0/0	0/0	0/0	0/0	0/0	11	1	1679		TRUE
6	134508495	T	G	#N/A	#N/A	#N/A	#N/A	#N/A	#N/A	#N/A	#N/A	#N/A	#N/A	#N/A	#N/A	#N/A	#N/A	0	0	FALSE	FALSE	FALSE
6	135468964	T	C	C	PASS	0/0	0/0	0/0	0/0	0/0	0/1	0/0	0/0	0/0	0/0	0/0	0/0	11	1	1680		TRUE
6	135546580	G	T	T	PASS	0/0	0/0	0/0	0/0	0/1	0/0	0/0	0/0	0/0	0/0	0/0	0/0	11	1	1681		TRUE
6	135919385	G	T	T	PASS	0/0	0/0	0/0	0/0	0/1	0/0	0/0	0/0	0/0	0/0	0/0	0/0	11	1	1682		TRUE
6	136126448	G	T	T	PASS	0/0	0/0	0/0	0/0	0/0	0/0	0/0	0/1	0/0	0/0	0/0	0/0	11	1	1683		TRUE
6	136190729	C	A	A	PASS	0/0	0/0	0/1	0/0	0/0	0/0	0/0	0/0	0/0	0/0	0/0	0/0	11	1	1684		TRUE
6	136462080	G	T	T	PASS	0/0	0/0	0/0	0/0	0/0	0/0	0/0	0/1	0/0	0/0	0/0	0/0	11	1	1685		TRUE
6	136469083	C	T	T	PASS	0/0	0/0	0/0	0/1	0/0	0/0	0/0	0/0	0/0	0/0	0/0	0/0	11	1	1686		TRUE
6	137220232	C	A	A	PASS	0/1	0/0	0/0	0/0	0/0	0/0	0/0	0/0	0/0	0/0	0/0	0/0	11	1	1687		TRUE
6	138238421	A	G	G	PASS	0/0	0/0	0/0	0/0	0/1	0/0	0/0	0/0	0/0	0/0	0/0	0/0	11	1	1688		TRUE
6	138567423	C	A	A	PASS	0/0	0/0	0/0	0/0	0/0	0/0	0/0	0/0	0/0	0/0	0/0	0/1	11	1	1689		TRUE
6	138833050	T	A	A	PASS	0/0	0/0	0/0	0/0	0/0	0/0	0/0	0/0	0/0	0/0	0/0	0/1	11	1	1690		TRUE
6	138852756	A	C	C	PASS	0/0	0/0	0/0	0/0	0/1	0/0	0/0	0/0	0/0	0/0	0/0	0/0	11	1	1691		TRUE
6	139489030	G	T	T	PASS	0/0	0/0	0/0	0/0	0/0	0/0	0/0	0/0	0/1	0/0	0/0	0/0	11	1	1692		TRUE
6	139503749	C	G	#N/A	#N/A	#N/A	#N/A	#N/A	#N/A	#N/A	#N/A	#N/A	#N/A	#N/A	#N/A	#N/A	#N/A	0	0	FALSE	FALSE	FALSE
6	141347134	T	C	C	PASS	0/0	0/0	0/1	0/0	0/0	0/0	0/0	0/0	0/0	0/0	0/0	0/0	11	1	1693		TRUE
6	143397495	C	T	T	PASS	0/1	0/0	0/0	0/0	0/0	0/0	0/0	0/1	0/0	0/0	0/0	0/0	10	1	FALSE	?	FALSE
6	143741846	T	A	A	PASS	0/0	0/0	0/0	0/0	0/0	0/0	0/0	0/0	0/0	0/0	0/0	0/1	11	1	1694		TRUE
6	144104325	A	G	G	PASS	0/0	0/0	0/0	0/0	0/0	0/1	0/0	0/0	0/0	0/0	0/0	0/0	11	1	1695		TRUE
6	145438593	C	T	T	PASS	0/0	0/0	0/1	0/1	0/0	0/0	0/0	0/0	0/0	0/1	0/0	./.	8	1	FALSE	?	FALSE
6	145625626	T	G	G	PASS	0/0	0/0	0/0	0/0	0/0	0/0	0/0	0/0	0/1	0/0	0/0	0/0	11	1	1696		TRUE
6	147215445	G	T	T	PASS	0/0	0/0	0/0	0/0	0/0	0/0	0/1	0/0	0/0	0/0	0/0	0/0	11	1	1697		TRUE
6	147232777	G	T	T	PASS	0/0	0/0	0/0	0/0	0/0	0/0	0/0	0/0	0/1	0/0	0/0	0/0	11	1	1698		TRUE
7	3403959	G	T	T	PASS	0/0	0/0	0/0	0/0	0/0	0/0	0/0	0/0	0/0	0/0	0/0	0/1	11	1	1699		TRUE
7	4828891	G	A	A	PASS	0/0	0/0	0/0	0/0	0/0	0/0	0/0	0/1	0/0	0/0	0/0	0/0	11	1	1700		TRUE
7	5181273	C	A	A	PASS	0/0	0/0	0/0	0/0	0/1	0/0	0/0	0/0	0/0	0/0	0/0	0/0	11	1	1701		TRUE
7	5524303	C	T	T	PASS	0/0	0/0	0/0	0/0	0/1	0/0	0/0	0/0	0/0	0/0	0/0	0/0	11	1	1702		TRUE
7	5529655	A	G	G	PASS	0/0	0/0	0/0	0/0	0/0	0/0	0/0	0/1	0/0	0/0	0/0	0/0	11	1	1703		TRUE
7	5606353	G	T	T	PASS	0/0	0/0	0/1	0/0	0/0	0/0	0/0	0/0	0/0	0/0	0/0	0/0	11	1	1704		TRUE
7	5725688	C	T	T	PASS	0/0	0/0	0/0	0/0	0/0	0/0	0/0	0/0	0/0	0/0	0/0	0/1	11	1	1705		TRUE
7	5797706	C	T	T	PASS	0/0	0/0	0/0	0/1	0/0	0/0	0/0	0/0	0/0	0/0	0/0	0/0	11	1	1706		TRUE
7	5914930	A	C	C	PASS	0/0	0/0	0/1	0/0	0/0	0/0	0/0	0/0	0/0	0/0	0/0	0/0	11	1	1707		TRUE
7	10102660	A	G	G	PASS	0/0	0/0	0/0	0/0	0/0	0/0	0/0	0/1	0/0	0/0	0/0	0/0	11	1	1708		TRUE
7	10171773	A	G	G	PASS	0/0	0/0	0/1	0/0	0/0	0/0	0/0	0/0	0/0	0/0	0/0	0/0	11	1	1709		TRUE
7	10681811	G	T	T	PASS	0/0	0/0	0/0	0/0	0/0	0/0	0/0	0/1	0/0	0/0	0/0	0/0	11	1	1710		TRUE
7	10682758	T	A	A	PASS	0/1	0/0	0/0	0/0	0/0	0/0	0/0	0/0	0/0	0/0	0/0	0/0	11	1	1711		TRUE
7	10700359	G	T	T	PASS	0/0	0/0	0/0	0/0	0/0	0/0	0/0	0/0	0/1	0/0	0/0	0/0	11	1	1712		TRUE
7	10765721	C	A	A	PASS	0/0	0/0	0/1	0/0	0/0	0/0	0/0	0/0	0/0	0/0	0/0	0/0	11	1	1713		TRUE
7	10851741	G	C	C	PASS	0/0	0/0	0/0	0/1	0/0	0/0	0/0	0/0	0/0	0/0	0/0	0/0	11	1	1714		TRUE
7	11135158	T	C	C	PASS	0/0	0/0	0/0	0/0	0/1	0/0	0/0	0/0	0/0	0/0	0/0	0/0	11	1	1715		TRUE
7	11454621	G	A	A	PASS	0/1	0/0	0/0	0/0	0/0	0/0	0/0	0/0	0/0	0/0	0/0	0/0	11	1	1716		TRUE
7	12588235	C	G	G	PASS	0/0	0/0	0/0	0/1	0/0	0/0	0/0	0/0	0/0	0/0	0/0	0/0	11	1	1717		TRUE
7	12752848	G	A	A	PASS	0/0	0/0	0/0	0/0	0/0	0/0	0/1	0/0	0/0	0/0	0/0	0/0	11	1	1718		TRUE
7	13173831	C	T	T	PASS	0/0	0/0	0/0	0/0	0/0	0/0	0/0	0/1	0/0	0/0	0/0	0/0	11	1	1719		TRUE
7	14112795	T	C	C	PASS	0/0	0/0	0/0	0/0	0/0	0/0	0/0	0/0	0/0	0/0	0/1	0/0	11	1	1720		TRUE
7	14306488	G	T	T	PASS	0/0	0/0	0/0	0/0	0/0	0/0	0/0	0/1	0/0	0/0	0/0	0/0	11	1	1721		TRUE
7	15651251	G	T	T	PASS	0/0	0/0	0/0	0/0	0/0	0/0	0/0	0/0	0/0	0/0	0/0	0/1	11	1	1722		TRUE
7	16461260	A	G	#N/A	#N/A	#N/A	#N/A	#N/A	#N/A	#N/A	#N/A	#N/A	#N/A	#N/A	#N/A	#N/A	#N/A	0	0	FALSE	FALSE	FALSE
7	17598585	C	A	A	PASS	0/0	0/1	0/0	0/0	0/0	0/0	0/0	0/0	0/0	0/0	0/0	0/0	11	1	1723		TRUE
7	17774793	A	G	G	PASS	0/0	0/0	0/0	0/0	0/0	0/0	0/0	0/1	0/0	0/0	0/0	0/0	11	1	1724		TRUE
7	18327636	C	G	G	PASS	0/0	0/0	0/1	0/0	0/0	0/0	0/0	0/0	0/0	0/0	0/0	0/0	11	1	1725		TRUE
7	18628907	G	A	A	PASS	0/1	0/0	0/0	0/0	0/0	0/0	0/0	0/0	0/0	0/0	0/0	0/0	11	1	1726		TRUE
7	19199032	T	G	#N/A	#N/A	#N/A	#N/A	#N/A	#N/A	#N/A	#N/A	#N/A	#N/A	#N/A	#N/A	#N/A	#N/A	0	0	FALSE	FALSE	FALSE
7	24075096	C	T	T	PASS	0/0	0/0	0/1	0/0	0/0	0/0	0/0	0/0	0/0	0/0	0/0	0/0	11	1	1727		TRUE
7	24093565	C	A	A	PASS	0/0	0/0	0/0	0/1	0/0	0/0	0/0	0/0	0/0	0/0	0/0	0/0	11	1	1728		TRUE
7	25627637	A	T	T	PASS	0/0	0/0	0/0	0/0	0/1	0/0	0/0	0/0	0/0	0/0	0/0	0/0	11	1	1729		TRUE
7	25641630	G	T	T	PASS	0/0	0/0	0/0	0/0	0/0	0/0	0/1	0/0	0/0	0/0	0/0	0/0	11	1	1730		TRUE
7	26164179	G	T	T	PASS	0/0	0/0	0/0	0/0	0/1	0/0	0/0	0/0	0/0	0/0	0/0	0/0	11	1	1731		TRUE
7	27160361	T	A	A	PASS	0/0	0/0	0/0	0/0	0/0	0/0	0/0	0/0	0/1	0/0	0/0	0/0	11	1	1732		TRUE
7	28040265	G	A	A	PASS	0/0	0/0	0/0	0/0	0/0	0/0	0/0	0/1	0/0	0/0	0/0	0/0	11	1	1733		TRUE
7	30426551	A	T	T	PASS	0/1	0/0	0/0	0/0	0/0	0/0	0/0	0/0	0/0	0/0	0/0	0/0	11	1	1734		TRUE
7	30482931	C	A	A	PASS	0/0	0/0	0/0	0/0	0/1	0/0	0/0	0/0	0/0	0/0	0/0	0/0	11	1	1735		TRUE
7	34023372	T	C	C	PASS	0/0	0/0	0/0	0/0	0/1	0/0	0/0	0/0	0/0	0/0	0/0	0/0	11	1	1736		TRUE
7	34268901	T	C	C	PASS	0/0	0/0	0/0	0/1	0/0	0/0	0/0	0/0	0/0	0/0	0/0	0/0	11	1	1737		TRUE
7	34479854	G	T	T	PASS	0/0	0/0	0/0	0/0	0/0	0/0	0/0	0/0	0/1	0/0	0/0	0/0	11	1	1738		TRUE
7	35498012	C	A	A	PASS	0/0	0/0	0/1	0/0	0/0	0/0	0/0	0/0	0/0	0/0	0/0	0/0	11	1	1739		TRUE
7	35996802	G	T	T	PASS	0/0	0/0	0/0	0/0	0/0	0/0	0/0	0/1	0/0	0/0	0/0	0/0	11	1	1740		TRUE
7	36182731	G	T	T	PASS	0/0	0/0	0/0	0/1	0/0	0/0	0/0	0/0	0/0	0/0	0/0	0/0	11	1	1741		TRUE
7	36476881	G	C	C	PASS	0/0	0/1	0/0	0/0	0/0	0/0	0/0	0/0	0/0	0/0	0/0	0/0	11	1	1742		TRUE
7	36793969	C	A	A	PASS	0/0	0/0	0/0	0/0	0/0	0/0	0/1	0/0	0/0	0/0	0/0	0/0	11	1	1743		TRUE
7	36801239	C	T	T	PASS	0/1	0/0	0/0	0/0	0/0	0/0	0/0	0/0	0/0	0/0	0/0	0/0	11	1	1744		TRUE
7	36807855	G	A	A	PASS	0/0	0/0	0/0	0/0	0/1	0/0	0/0	0/0	0/0	0/0	0/0	0/0	11	1	1745		TRUE
7	37017057	G	A	A	PASS	0/0	0/0	0/0	0/0	0/1	0/0	0/0	0/0	0/0	0/0	0/0	0/0	11	1	1746		TRUE
7	37144561	G	T	T	PASS	0/0	0/0	0/0	0/0	0/0	0/0	0/0	0/0	0/0	0/0	0/0	0/1	11	1	1747		TRUE
7	37340638	G	T	T	PASS	0/0	0/0	0/0	0/0	0/0	0/1	0/0	0/0	0/0	0/0	0/0	0/0	11	1	1748		TRUE
7	37690280	A	T	T	PASS	0/0	0/1	0/0	0/0	0/0	0/0	0/0	0/0	0/0	0/0	0/0	0/0	11	1	1749		TRUE
7	39637329	G	T	T	PASS	0/0	0/1	0/0	0/0	0/0	0/0	0/0	0/0	0/0	0/0	0/0	0/0	11	1	1750		TRUE
7	39735979	C	A	A	PASS	0/0	0/0	0/1	0/0	0/0	0/0	0/0	0/0	0/0	0/0	0/0	0/0	11	1	1751		TRUE
7	40387610	C	T	T	PASS	0/0	0/0	0/1	0/0	0/0	0/0	0/0	0/0	0/0	0/0	0/0	0/0	11	1	1752		TRUE
7	40439681	C	G	G	PASS	0/0	0/0	0/0	0/0	0/0	0/0	0/0	0/0	0/1	0/0	0/0	0/0	11	1	1753		TRUE
7	41513500	C	A	A	PASS	0/0	0/0	0/0	0/0	0/0	0/0	0/0	0/0	0/1	0/0	0/0	0/0	11	1	1754		TRUE
7	41543212	C	A	A	PASS	0/0	0/0	0/0	0/0	0/0	0/1	0/0	0/0	0/0	0/0	0/0	0/0	11	1	1755		TRUE
7	41582730	C	A	A	PASS	0/0	0/0	0/0	0/0	0/0	0/0	0/0	0/0	0/1	0/0	0/0	0/0	11	1	1756		TRUE
7	41989941	C	T	T	PASS	0/0	0/0	0/0	0/0	0/0	0/0	0/0	0/0	0/0	0/0	0/0	0/1	11	1	1757		TRUE
7	42233313	T	C	#N/A	#N/A	#N/A	#N/A	#N/A	#N/A	#N/A	#N/A	#N/A	#N/A	#N/A	#N/A	#N/A	#N/A	0	0	FALSE	FALSE	FALSE
7	44142005	C	T	T	PASS	0/1	0/0	0/0	0/0	0/0	0/0	0/0	0/0	0/0	0/0	0/0	0/0	11	1	1758		TRUE
7	45048481	C	A	A	PASS	0/0	0/0	0/0	0/0	0/1	0/0	0/0	0/0	0/0	0/0	0/0	0/0	11	1	1759		TRUE
7	45767475	C	A	A	PASS	0/1	0/0	0/0	0/0	0/0	0/0	0/0	0/0	0/0	0/0	0/0	0/0	11	1	1760		TRUE
7	47085322	G	C	C	PASS	0/1	0/0	0/0	0/0	0/0	0/0	0/0	0/0	0/0	0/0	0/0	0/0	11	1	1761		TRUE
7	48457228	G	A	A	PASS	0/1	0/0	0/0	0/0	0/0	0/0	0/0	0/0	0/0	0/0	0/0	0/0	11	1	1762		TRUE
7	49019609	T	A	A	PASS	0/0	0/0	0/1	0/0	0/0	0/0	0/0	0/0	0/0	0/0	0/0	0/0	11	1	1763		TRUE
7	50678678	C	T	T	PASS	0/0	0/1	0/0	0/0	0/0	0/0	0/0	0/0	0/0	0/0	0/0	0/0	11	1	1764		TRUE
7	50919750	G	C	C	PASS	0/0	0/0	0/0	0/0	0/1	0/0	0/0	0/0	0/0	0/0	0/0	0/0	11	1	1765		TRUE
7	51464442	C	T	T	PASS	0/0	0/1	0/0	0/0	0/0	0/0	0/0	0/0	0/0	0/0	0/0	0/0	11	1	1766		TRUE
7	51561085	C	T	T	PASS	0/0	0/1	0/0	0/0	0/0	0/0	0/0	0/0	0/0	0/0	0/0	0/0	11	1	1767		TRUE
7	51610199	G	A	A	PASS	0/0	0/0	0/0	0/1	0/0	0/0	0/0	0/0	0/0	0/0	0/0	0/0	11	1	1768		TRUE
7	52647424	C	G	G	PASS	0/0	0/0	0/0	0/0	0/0	0/1	0/0	0/0	0/0	0/0	0/0	0/0	11	1	1769		TRUE
7	52760402	G	T	T	PASS	0/0	0/0	0/0	0/0	0/0	0/0	0/0	0/0	0/0	0/0	0/1	0/0	11	1	1770		TRUE
7	52777777	A	G	G	PASS	0/0	0/1	0/0	0/0	0/0	0/0	0/0	0/0	0/0	0/0	0/0	0/0	11	1	1771		TRUE
7	53847720	A	G	G	PASS	0/0	0/0	0/0	0/1	0/0	0/0	0/0	0/0	0/0	0/0	0/0	0/0	11	1	1772		TRUE
7	54072327	G	A	A	PASS	0/0	0/1	0/0	0/0	0/0	0/0	0/0	0/0	0/0	0/0	0/0	0/0	11	1	1773		TRUE
7	54315283	C	T	T	PASS	0/0	0/0	0/0	0/1	0/0	0/0	0/0	0/0	0/0	0/0	0/0	0/0	11	1	1774		TRUE
7	54337297	G	T	T	PASS	0/0	0/0	0/1	0/0	0/0	0/0	0/0	0/0	0/0	0/0	0/0	0/0	11	1	1775		TRUE
7	54465205	C	A	A	PASS	0/1	0/0	0/0	0/0	0/0	0/0	0/0	0/0	0/0	0/0	0/0	0/0	11	1	1776		TRUE
7	54484957	C	T	T	PASS	0/0	0/0	0/0	0/0	0/0	0/0	0/0	0/0	0/0	0/0	0/0	0/1	11	1	1777		TRUE
7	54613487	A	C	C	PASS	0/0	0/0	0/0	0/0	0/0	0/0	0/0	0/0	0/0	0/0	0/1	0/0	11	1	1778		TRUE
7	54655234	T	G	G	PASS	0/0	0/0	0/0	0/0	0/1	0/0	0/0	0/0	0/0	0/0	0/0	0/0	11	1	1779		TRUE
7	54702534	G	A	A	PASS	0/0	0/0	0/0	0/0	0/1	0/0	0/0	0/0	0/0	0/0	0/0	0/0	11	1	1780		TRUE
7	54765093	A	C	C	PASS	0/0	0/0	0/1	0/0	0/0	0/0	0/0	0/0	0/0	0/0	0/0	0/0	11	1	1781		TRUE
7	54784269	C	A	A	PASS	0/0	0/0	0/0	0/0	0/0	0/0	0/1	0/0	0/0	0/0	0/0	0/0	11	1	1782		TRUE
7	55312390	G	T	T	PASS	0/0	0/1	0/0	0/0	0/0	0/0	0/0	0/0	0/0	0/0	0/0	0/0	11	1	1783		TRUE
7	56633111	T	G	G	PASS	0/0	0/0	0/1	0/0	0/0	0/0	0/0	0/0	0/0	0/0	0/0	0/0	11	1	1784		TRUE
7	56675566	A	G	G	PASS	0/0	0/0	0/0	0/0	0/0	0/0	0/0	0/0	0/1	0/0	0/0	0/0	11	1	1785		TRUE
7	56718584	T	C	C	PASS	0/0	0/0	0/0	0/0	0/0	0/0	0/0	0/1	0/0	0/0	0/0	0/0	11	1	1786		TRUE
7	56727111	T	G	G	PASS	0/0	0/0	0/0	0/0	0/0	0/0	0/0	0/0	0/0	0/0	0/1	0/0	11	1	1787		TRUE
7	56966093	G	T	T	PASS	0/0	0/0	0/0	0/0	0/1	0/0	0/0	0/0	0/0	0/0	0/0	0/0	11	1	1788		TRUE
7	57906565	A	G	G	PASS	0/0	0/0	0/0	0/0	0/0	0/1	0/0	0/0	0/0	0/0	0/0	0/0	11	1	1789		TRUE
7	57915964	A	G	G	PASS	0/0	0/0	0/0	0/0	0/0	0/0	0/0	0/1	0/0	0/0	0/0	0/0	11	1	1790		TRUE
7	58085733	C	A	A	PASS	0/0	0/0	0/0	0/0	0/0	0/0	0/0	0/0	0/1	0/0	0/0	0/0	11	1	1791		TRUE
7	58260369	G	A	A	PASS	0/0	0/0	0/0	0/0	0/0	0/0	0/1	0/0	0/0	0/0	0/0	0/0	11	1	1792		TRUE
7	59451408	A	C	C	PASS	0/0	0/0	0/1	0/0	0/0	0/0	0/0	0/0	0/0	0/0	0/0	0/0	11	1	1793		TRUE
7	60277755	A	G	G	PASS	0/1	0/0	0/0	0/0	0/0	0/0	0/0	0/0	0/0	0/0	0/0	0/0	11	1	1794		TRUE
7	60283375	C	T	T	PASS	0/1	0/0	0/0	0/0	0/0	0/0	0/0	0/0	0/0	0/0	0/0	0/0	11	1	1795		TRUE
7	60566054	C	T	T	PASS	0/0	0/0	0/0	0/0	0/0	0/0	0/0	0/0	0/0	0/0	0/0	0/1	11	1	1796		TRUE
7	60617937	C	A	A	PASS	0/0	0/0	0/0	0/0	0/1	0/0	0/0	0/0	0/0	0/0	0/0	0/0	11	1	1797		TRUE
7	60767750	C	T	#N/A	#N/A	#N/A	#N/A	#N/A	#N/A	#N/A	#N/A	#N/A	#N/A	#N/A	#N/A	#N/A	#N/A	0	0	FALSE	FALSE	FALSE
7	61265053	G	T	T	PASS	0/0	0/0	0/0	0/0	0/0	0/0	0/0	0/0	0/0	0/0	0/1	0/0	11	1	1798		TRUE
7	61329502	G	T	T	PASS	0/0	0/1	0/0	0/0	0/0	0/0	0/0	0/0	0/0	0/0	0/0	0/0	11	1	1799		TRUE
7	61654856	A	C	C	PASS	0/0	0/0	0/0	0/0	0/0	0/1	0/0	0/0	0/0	0/0	0/0	0/0	11	1	1800		TRUE
7	61682863	A	C	C	PASS	0/0	0/0	0/0	0/0	0/0	0/0	0/0	0/1	0/0	0/0	0/0	0/0	11	1	1801		TRUE
7	62213869	A	T	T	PASS	0/0	0/0	0/0	0/0	0/0	0/0	0/0	0/1	0/0	0/0	0/0	0/0	11	1	1802		TRUE
7	62394885	T	C	C	PASS	0/0	0/0	0/0	0/0	0/0	0/0	0/1	0/0	0/0	0/0	0/0	0/0	11	1	1803		TRUE
7	62655487	A	G	G	PASS	0/0	0/0	0/1	0/0	0/0	0/0	0/0	0/0	0/0	0/0	0/0	0/0	11	1	1804		TRUE
7	62668031	C	A	A	PASS	0/0	0/0	0/0	0/0	0/0	0/0	0/1	0/0	0/0	0/0	0/0	0/0	11	1	1805		TRUE
7	62742611	C	A	A	PASS	0/1	0/0	0/0	0/0	0/0	0/0	0/0	0/0	0/0	0/0	0/0	0/0	11	1	1806		TRUE
7	62800898	G	A	A	PASS	0/0	0/0	0/1	0/0	0/0	0/0	0/0	0/0	0/0	0/0	0/0	0/0	11	1	1807		TRUE
7	66170304	C	A	A	PASS	0/0	0/0	0/0	0/0	0/0	0/1	0/0	0/0	0/0	0/0	0/0	0/0	11	1	1808		TRUE
7	66329758	G	A	A	PASS	0/0	0/0	0/0	0/1	0/0	0/0	0/0	0/0	0/0	0/0	0/0	0/0	11	1	1809		TRUE
7	67195043	C	A	A	PASS	0/0	0/0	0/0	0/0	0/0	0/0	0/0	0/0	0/1	0/0	0/0	0/0	11	1	1810		TRUE
7	67865243	C	A	A	PASS	0/0	0/0	0/0	0/1	0/0	0/0	0/0	0/0	0/0	0/0	0/0	0/0	11	1	1811		TRUE
7	70314638	G	T	T	PASS	0/0	0/0	0/1	0/0	0/0	0/0	0/0	0/0	0/0	0/0	0/0	0/0	11	1	1812		TRUE
7	70907152	T	C	C	PASS	0/0	0/0	0/0	0/0	0/0	0/1	0/0	0/0	0/0	0/0	0/0	0/0	11	1	1813		TRUE
7	71155965	C	T	T	PASS	0/0	0/0	0/0	0/1	0/0	0/0	0/0	0/0	0/0	0/0	0/0	0/0	11	1	1814		TRUE
7	71242140	T	C	C	PASS	0/0	0/0	0/0	0/0	0/0	0/0	0/0	0/0	0/1	0/0	0/0	0/0	11	1	1815		TRUE
7	72634436	G	A	A	PASS	0/0	0/0	0/1	0/0	0/0	0/0	0/0	0/0	0/0	0/0	0/0	0/0	11	1	1816		TRUE
7	73256681	G	T	T	PASS	0/0	0/0	0/0	0/0	0/0	0/0	0/0	0/1	0/0	0/0	0/0	0/0	11	1	1817		TRUE
7	73284629	G	T	T	PASS	0/0	0/0	0/1	0/0	0/0	0/0	0/0	0/0	0/0	0/0	0/0	0/0	11	1	1818		TRUE
7	73290810	T	C	C	PASS	0/0	0/0	0/1	0/0	0/0	0/0	0/0	0/0	0/0	0/0	0/0	0/0	11	1	1819		TRUE
7	74502559	C	A	A	PASS	0/0	0/0	0/0	0/0	0/1	0/0	0/0	0/0	0/0	0/0	0/0	0/0	11	1	1820		TRUE
7	76778104	G	T	T	PASS	0/0	0/1	0/0	0/0	0/0	0/0	0/0	0/0	0/0	0/0	0/0	0/0	11	1	1821		TRUE
7	76944635	T	A	A	PASS	0/1	0/0	0/0	0/0	0/0	0/0	0/0	0/0	0/0	0/0	0/0	0/0	11	1	1822		TRUE
7	77229111	A	G	G	PASS	0/1	0/0	0/0	0/0	0/0	0/0	0/0	0/0	0/0	0/0	0/0	0/0	11	1	1823		TRUE
7	77296495	C	A	A	PASS	0/0	0/0	0/0	0/1	0/0	0/0	0/0	0/0	0/0	0/0	0/0	0/0	11	1	1824		TRUE
7	77439281	G	T	T	PASS	0/0	0/1	0/0	0/0	0/0	0/0	0/0	0/0	0/0	0/0	0/0	0/0	11	1	1825		TRUE
7	77778066	G	C	C	PASS	0/1	0/0	0/0	0/0	0/0	0/0	0/0	0/0	0/0	0/0	0/0	0/0	11	1	1826		TRUE
7	77849657	C	T	T	PASS	0/0	0/1	0/0	0/0	0/0	0/0	0/0	0/0	0/0	0/0	0/0	0/0	11	1	1827		TRUE
7	78561887	A	T	T	PASS	0/0	0/0	0/0	0/0	0/0	0/0	0/0	0/0	0/0	0/0	0/1	0/0	11	1	1828		TRUE
7	79429614	G	T	T	PASS	0/0	0/0	0/0	0/0	0/0	0/0	0/1	0/0	0/0	0/0	0/0	0/0	11	1	1829		TRUE
7	79983109	G	A	A	PASS	0/0	0/0	0/0	0/0	0/0	0/0	0/0	0/0	0/0	0/0	0/1	0/0	11	1	1830		TRUE
7	81898966	T	A	A	PASS	0/0	0/0	0/0	0/0	0/0	0/0	0/0	0/1	0/0	0/0	0/0	0/0	11	1	1831		TRUE
7	84869409	C	T	T	PASS	0/0	0/0	0/0	0/0	0/0	0/0	0/0	0/0	0/0	0/0	0/1	0/0	11	1	1832		TRUE
7	84899803	A	G	G	PASS	0/1	0/0	0/0	0/0	0/0	0/0	0/0	0/0	0/0	0/0	0/0	0/0	11	1	1833		TRUE
7	86139400	T	C	C	PASS	0/1	0/0	0/0	0/0	0/0	0/0	0/0	0/0	0/0	0/0	0/0	0/0	11	1	1834		TRUE
7	86757481	T	G	G	SNP_LowQualityDepth	0/0	0/0	0/0	0/0	0/0	0/0	0/0	0/0	0/0	0/0	0/0	0/1	11	1	FALSE	TRUE	TRUE
7	86841597	G	T	T	PASS	0/0	0/1	0/0	0/0	0/0	0/0	0/0	0/0	0/0	0/0	0/0	0/0	11	1	1835		TRUE
7	87003872	A	T	T	PASS	0/1	0/0	0/0	0/0	0/0	0/0	0/0	0/0	0/0	0/0	0/0	0/0	11	1	1836		TRUE
7	87936891	T	A	A	PASS	0/0	0/0	0/0	0/0	0/0	0/0	0/0	0/1	0/0	0/0	0/0	0/0	11	1	1837		TRUE
7	88059566	C	T	#N/A	#N/A	#N/A	#N/A	#N/A	#N/A	#N/A	#N/A	#N/A	#N/A	#N/A	#N/A	#N/A	#N/A	0	0	FALSE	?	FALSE
7	88546105	G	A	A	PASS	0/1	0/0	0/0	0/0	0/0	0/0	0/0	0/0	0/0	0/0	0/0	0/0	11	1	1838		TRUE
7	88665786	G	T	T	PASS	0/0	0/0	0/0	0/1	0/0	0/0	0/0	0/0	0/0	0/0	0/0	0/0	11	1	1839		TRUE
7	89215493	C	A	A	PASS	0/1	0/0	0/0	0/0	0/0	0/0	0/0	0/0	0/0	0/0	0/0	0/0	11	1	1840		TRUE
7	91040828	A	T	T	PASS	0/0	0/0	0/1	0/0	0/0	0/0	0/0	0/0	0/0	0/0	0/0	0/0	11	1	1841		TRUE
7	91263958	G	T	T	PASS	0/1	0/0	0/0	0/0	0/0	0/0	0/0	0/0	0/0	0/0	0/0	0/0	11	1	1842		TRUE
7	91659988	A	G	G	PASS	0/0	0/0	0/0	0/0	0/0	0/0	0/0	0/0	0/0	0/0	0/1	0/0	11	1	1843		TRUE
7	93454396	A	T	T	PASS	0/0	0/1	0/0	0/0	0/0	0/0	0/0	0/0	0/0	0/0	0/0	0/0	11	1	1844		TRUE
7	94268841	A	G	G	PASS	0/0	0/0	0/0	0/0	0/1	0/0	0/0	0/0	0/0	0/0	0/0	0/0	11	1	1845		TRUE
7	94827880	T	C	C	PASS	0/0	0/0	0/0	0/0	0/1	0/0	0/0	0/0	0/0	0/0	0/0	0/0	11	1	1846		TRUE
7	94970678	G	T	T	PASS	0/0	0/0	0/0	0/0	0/0	0/0	0/0	0/0	0/0	0/0	0/0	0/1	11	1	1847		TRUE
7	95610558	C	G	G	PASS	0/0	0/0	0/0	0/0	0/1	0/0	0/0	0/0	0/0	0/0	0/0	0/0	11	1	1848		TRUE
7	96714523	T	A	A	PASS	0/1	0/0	0/0	0/0	0/0	0/0	0/0	0/0	0/0	0/0	0/0	0/0	11	1	1849		TRUE
7	101492672	G	A	A	PASS	0/0	0/0	0/0	0/0	0/0	0/0	0/0	0/0	0/0	0/0	0/0	0/1	11	1	1850		TRUE
7	101947028	G	A	A	PASS	0/0	0/0	0/0	0/0	0/0	0/0	0/0	0/1	0/0	0/0	0/0	0/0	11	1	1851		TRUE
7	102174008	A	T	T	PASS	0/0	0/1	0/0	0/0	0/0	0/0	0/0	0/0	0/0	0/0	0/0	0/0	11	1	1852		TRUE
7	102784357	C	T	T	PASS	0/0	0/0	0/0	0/0	0/1	0/0	0/0	0/0	0/0	0/0	0/0	0/0	11	1	1853		TRUE
7	102882249	T	A	A	PASS	0/0	0/0	0/0	0/1	0/0	0/0	0/0	0/0	0/0	0/0	0/0	0/0	11	1	1854		TRUE
7	102950087	C	T	T	PASS	0/0	0/1	0/0	0/0	0/0	0/0	0/0	0/0	0/0	0/0	0/0	0/0	11	1	1855		TRUE
7	103183178	C	A	A	PASS	0/0	0/0	0/0	0/0	0/1	0/0	0/0	0/0	0/0	0/0	0/0	0/0	11	1	1856		TRUE
7	104073556	C	A	A	PASS	0/1	0/0	0/0	0/0	0/0	0/0	0/0	0/0	0/0	0/0	0/0	0/0	11	1	1857		TRUE
7	104117016	G	T	T	PASS	0/0	0/1	0/0	0/0	0/0	0/0	0/0	0/0	0/0	0/0	0/0	0/0	11	1	1858		TRUE
7	104393253	T	A	A	PASS	0/0	0/0	0/0	0/0	0/0	0/0	0/0	0/0	0/0	0/0	0/0	0/1	11	1	1859		TRUE
7	104404711	A	C	#N/A	#N/A	#N/A	#N/A	#N/A	#N/A	#N/A	#N/A	#N/A	#N/A	#N/A	#N/A	#N/A	#N/A	0	0	FALSE	FALSE	FALSE
7	106866208	C	T	T	PASS	0/0	0/0	0/0	0/0	0/0	0/0	0/0	0/0	0/0	0/0	0/0	0/1	11	1	1860		TRUE
7	106866851	C	A	A	PASS	0/1	0/0	0/0	0/0	0/0	0/0	0/0	0/0	0/0	0/0	0/0	0/0	11	1	1861		TRUE
7	107070118	A	T	T	PASS	0/0	0/0	0/1	0/0	0/0	0/0	0/0	0/0	0/0	0/0	0/0	0/0	11	1	1862		TRUE
7	107878781	G	A	A	PASS	0/1	0/0	0/0	0/0	0/0	0/0	0/0	0/0	0/0	0/0	0/0	0/0	11	1	1863		TRUE
7	108607070	G	T	T	PASS	0/0	0/0	0/0	0/1	0/0	0/0	0/0	0/0	0/0	0/0	0/0	0/0	11	1	1864		TRUE
7	110176216	C	G	G	PASS	0/0	0/0	0/0	0/0	0/1	0/0	0/0	0/0	0/0	0/0	0/0	0/0	11	1	1865		TRUE
7	111599606	C	T	T	PASS	0/0	0/0	0/0	0/0	0/1	0/0	0/0	0/0	0/0	0/0	0/0	0/0	11	1	1866		TRUE
7	113669138	G	A	A	PASS	0/0	0/0	0/0	0/0	0/0	0/0	0/0	0/0	0/0	0/0	0/1	0/0	11	1	1867		TRUE
7	115437196	C	A	A	PASS	0/0	0/0	0/0	0/0	0/1	0/0	0/0	0/0	0/0	0/0	0/0	0/0	11	1	1868		TRUE
7	115965120	G	A	A	PASS	0/0	0/0	0/0	0/0	0/0	0/0	0/0	0/1	0/0	0/0	0/0	0/0	11	1	1869		TRUE
7	116313625	G	A	A	PASS	0/0	0/0	0/0	0/0	0/0	0/1	0/0	0/0	0/0	0/0	0/0	0/0	11	1	1870		TRUE
7	116420392	C	A	A	PASS	0/1	0/0	0/0	0/0	0/0	0/0	0/0	0/0	0/0	0/0	0/0	0/0	11	1	1871		TRUE
7	116847338	G	A	A	PASS	0/0	0/0	0/0	0/0	0/0	0/0	0/1	0/0	0/0	0/0	0/0	0/0	11	1	1872		TRUE
7	117110401	T	C	C	PASS	0/0	0/0	0/0	0/1	0/0	0/0	0/0	0/0	0/0	0/0	0/0	0/0	11	1	1873		TRUE
7	120484443	G	T	T	PASS	0/0	0/0	0/0	0/0	0/1	0/0	0/0	0/0	0/0	0/0	0/0	0/0	11	1	1874		TRUE
7	120599769	C	T	T	PASS	0/0	0/0	0/0	0/0	0/0	0/0	0/0	0/1	0/0	0/0	0/0	0/0	11	1	1875		TRUE
7	122521373	G	C	C	PASS	0/0	0/1	0/0	0/0	0/0	0/0	0/0	0/0	0/0	0/0	0/0	0/0	11	1	1876		TRUE
7	123124356	C	A	A	PASS	0/1	0/0	0/0	0/0	0/0	0/0	0/0	0/0	0/0	0/0	0/0	0/0	11	1	1877		TRUE
7	124696211	C	A	A	PASS	0/0	0/0	0/0	0/0	0/0	0/0	0/0	0/0	0/0	0/0	0/1	0/0	11	1	1878		TRUE
7	124972485	T	G	G	PASS	0/0	0/0	0/0	0/0	0/0	0/1	0/0	0/0	0/0	0/0	0/0	0/0	11	1	1879		TRUE
7	125224012	C	A	A	PASS	0/0	0/0	0/0	0/0	0/1	0/0	0/0	0/0	0/0	0/0	0/0	0/0	11	1	1880		TRUE
[truncated: 2,242 more rows]
