# Supplementary material for: Deficiency of nucleotide excision repair is associated with mutational signature observed in cancer
Source: HighWire-hosted journal article supplement (doi:10.1101/gr.246223.118), 2019-06-20
Supplement: Supplemental_Data_S3.xlsx [file Supplemental_Data_S3.xlsx]

## Sheet: NMF_2signatures
Supplemental Data S3. Relative contribution of indicated mutation types in de novo extracted Signature A and B.
	Relative contribution
Mutation type	Signature A	Signature B
A[C>A]A	0.0415886	0.0272255
A[C>A]C	0.030444	0.00690983
A[C>A]G	0.00415087	0.00218719
A[C>A]T	0.0394778	0.0152396
C[C>A]A	0.0285659	0.0115735
C[C>A]C	0.015946	0.0123467
C[C>A]G	0.00166054	1.80964e-07
C[C>A]T	0.0379625	0.0123143
G[C>A]A	0.0211077	0.0290626
G[C>A]C	0.0150544	0.0129751
G[C>A]G	0.00225285	0.00195428
G[C>A]T	0.0257856	0.0600906
T[C>A]A	0.0317539	0.0330789
T[C>A]C	0.0275514	0.0145517
T[C>A]G	0.0017694	0.00532645
T[C>A]T	0.0541783	0.0697032
A[C>G]A	0.0122765	0.0111671
A[C>G]C	0.00784848	0.00223578
A[C>G]G	0.000846863	0.0027137
A[C>G]T	0.00544679	0.00157285
C[C>G]A	0.00497767	0.00328521
C[C>G]C	0.00480292	0.00187463
C[C>G]G	0.00207524	5.01225e-07
C[C>G]T	0.00404296	0.0056113
G[C>G]A	0.004942	0.00169129
G[C>G]C	0.00694439	0.00342755
G[C>G]G	0.00166054	1.80964e-07
G[C>G]T	0.00307093	0.00525171
T[C>G]A	0.00691837	0.00127395
T[C>G]C	0.00308528	0.00413883
T[C>G]G	0.00248188	1.1442e-05
T[C>G]T	0.00937247	0.00897848
A[C>T]A	0.0240043	0.031261
A[C>T]C	0.0129642	0.0179183
A[C>T]G	0.00885916	0.0419268
A[C>T]T	0.0291485	0.0190101
C[C>T]A	0.00711715	0.0179682
C[C>T]C	0.0123707	0.0165128
C[C>T]G	0.0068635	0.0161147
C[C>T]T	0.0203489	0.00873067
G[C>T]A	0.00907272	0.0170313
G[C>T]C	0.00934537	0.0122961
G[C>T]G	0.00512281	0.0315367
G[C>T]T	0.0142367	0.00858316
T[C>T]A	0.0128714	0.0153057
T[C>T]C	0.0234954	0.0100527
T[C>T]G	0.00460967	0.0245554
T[C>T]T	0.0258929	0.0211138
A[T>A]A	0.018318	0.00320317
A[T>A]C	0.00955803	0.00381108
A[T>A]G	0.00809477	0.00409902
A[T>A]T	0.0176531	0.0144722
C[T>A]A	0.00757579	0.00150129
C[T>A]C	0.00695452	0.00669606
C[T>A]G	0.00805163	0.00142101
C[T>A]T	0.0110432	0.00404129
G[T>A]A	0.00461899	0.00266406
G[T>A]C	0.00766176	0.000840985
G[T>A]G	0.00622503	1.0077e-18
G[T>A]T	0.00762995	0.00525872
T[T>A]A	0.00581425	0.00874615
T[T>A]C	0.00954456	1.12988e-19
T[T>A]G	0.0085163	0.00190243
T[T>A]T	0.0177242	0.0149255
A[T>C]A	0.0097529	0.0117589
A[T>C]C	0.00259096	0.0108072
A[T>C]G	0.00734112	0.00618644
A[T>C]T	0.00113479	0.0116328
C[T>C]A	0.001907	0.00459809
C[T>C]C	0.00678042	0.0107544
C[T>C]G	0.00653304	0.0061577
C[T>C]T	0.00476137	0.0227145
G[T>C]A	0.00499115	0.0120191
G[T>C]C	0.00817445	0.0111047
G[T>C]G	0.00460555	0.0092455
G[T>C]T	0.00469463	0.010769
T[T>C]A	0.00741044	0.00554808
T[T>C]C	0.00626226	0.00706162
T[T>C]G	0.0046256	0.00593721
T[T>C]T	0.00654698	0.00668631
A[T>G]A	0.00707991	0.00270193
A[T>G]C	0.00580648	4.76009e-06
A[T>G]G	0.00545284	0.00211186
A[T>G]T	0.00250258	0.0103767
C[T>G]A	0.00373061	6.28776e-06
C[T>G]C	0.00497869	1.99771e-06
C[T>G]G	0.00159112	0.00556146
C[T>G]T	0.00914102	0.00983055
G[T>G]A	0.00086912	0.00596622
G[T>G]C	0.00463869	0.00209112
G[T>G]G	0.000464967	0.0114218
G[T>G]T	0.00241855	0.0110345
T[T>G]A	0.00544035	0.00158134
T[T>G]C	0.00373398	1.84854e-06
T[T>G]G	0.0052028	0.00462937
T[T>G]T	0.00748516	0.0284226
