# Supplementary material for: Deficiency of nucleotide excision repair is associated with mutational signature observed in cancer
Source: HighWire-hosted journal article supplement (doi:10.1101/gr.246223.118), 2019-06-20
Supplement: Supplemental_Methods_.docx [file Supplemental_Methods_.docx]

**Supplemental Methods**

**Mouse tissue material**

*Ercc1*-/Δ mice were generated and maintained as previously described [(Vermeij et al. 2016)](https://paperpile.com/c/FB4uHU/U2Am). Briefly, by crossing *Ercc1*∆/+ (C57BL6J or FVB background) with *Ercc1*+/− mice (FVB or C57BL6J background), *Ercc1*-/Δ mice were generated in a uniform F1 C57BL6J/FVB hybrid background. Wild type F1 littermates were used as controls. Animals were housed in individually ventilated cages under specific pathogen-free conditions in a controlled environment (20–22 °C, 12 h light : 12 h dark cycle). Tails were harvested and stored at -20°C until DNA isolation. Livers and small intestines were harvested and kept on ice in Adv+++ medium (Supplemental Table S7) for a few hours until further processing.

**RNA sequencing**

Total RNA was collected in TRIzol and purified from all organoid cultures using the Qiasymphony (Qiagen). RNA libraries for Illumina sequencing were generated from 50 ng of poly-A selected mRNA using the Neoprep (Illumina) and sequenced 2 x 75 bp paired-end to approximately 3300 Million base pairs per sample with the Illumina NextSeq 500 at the Utrecht Sequencing Facility. RNA sequencing reads were mapped with STAR v.2.4.2a to the mouse reference genome GRCm38. The BAM files were sorted with Sambamba v0.5.8 and reads were counted with HTSeq-count version 0.6.1p1 (default settings) to exons as defined in GRCm38v70.gtf (Ensembl). Non-uniquely mapped reads were not counted. Subsequently, DESeq v1.28.0 was used to normalize counts (Anders and Huber 2010).

**WGS and read alignment**

DNA was isolated from mouse liver organoid cultures and mouse control (tail) samples using the genomic tip 20-G kit (Qiagen) and from mouse small intestinal organoid samples and the human *XPC*KO sample using the Qiasymphony (Qiagen). DNA libraries for Illumina sequencing were generated from 200 ng genomic DNA using standard protocols (Illumina) and sequenced 2 x 100 bp paired-end to 30X base coverage with the Illumina HiSeq Xten at the Hartwig Medical Foundation. The sequence reads of *XPC*KO were mapped to the GRCh37 human reference genome using using the Burrows–Wheeler Aligner (BWA) v0.7.5a [(Li and Durbin 2009)](https://paperpile.com/c/FB4uHU/OjCk), with settings ‘-t 4 -c 100 -M’. Using this genome version instead of GRCh38 will affect the genomic coordinates of the mutations, but is not likely to affect the frequencies of the mutation types. The mapped data of clonal *XPC*WT organoids was previously generated in the study (‘donor_id’ 6) [(Blokzijl et al. 2016)](https://paperpile.com/c/FB4uHU/NA41P). The sequence reads of the mouse ASCs were mapped to the GRCm38 mouse reference genome using using the Burrows–Wheeler Aligner (BWA) v0.7.5a [(Li and Durbin 2009)](https://paperpile.com/c/FB4uHU/OjCk), with settings ‘-t 4 -c 100 -M’.

**Variant calling and base substitution filtering**

For both human and mouse samples, base substitutions and indels were multi-sample called with GATK HaplotypeCaller v3.4.46 with default settings and additional options ‘-stand_call_conf 30 -stand_emit_conf 15’ and GATK Queue v3.4.46 [(Van der Auwera et al. 2013)](https://paperpile.com/c/FB4uHU/L8vuq). For mouse samples the quality of the calls was assessed using GATK VariantFiltration v3.4.46 with options ‘QD < 2.0, MQ < 40.0, FS > 60.0, HaplotypeScore > 13.0, MQRankSum < -12.5, ReadPosRankSum < -8.0’ for base substitutions and ‘QD < 2.0, FS > 200.0, ReadPosRankSum < -20.0’ for indels, with additional options ‘clusterSize 3’ and ‘clusterWindowSize 35’. For human samples the quality of the calls was assessed using GATK VariantFiltration v3.4.46 with options ‘QD < 2.0, MQ < 40.0, FS > 60.0, HaplotypeScore > 13.0, MQRankSum < -12.5, ReadPosRankSum < -8.0, MQ0 >= 4 && ((MQ0 / (1.0 * DP)) > 0.1), DP < 5, QUAL < 30, QUAL >= 30.0 && QUAL < 50.0, SOR > 4.0’ for base substitutions and ‘QD < 2.0, FS > 200.0, ReadPosRankSum < -20.0, MQ0 >= 4 && ((MQ0 / (1.0 * DP)) > 0.1), DP < 5, QUAL < 30.0, QUAL >= 30.0 && QUAL < 50.0, SOR > 10.0’ for indels, with additional options ‘clusterSize 3’ and ‘clusterWindowSize 10.

For the mouse samples, we only considered base substitutions on the autosomal genome that were callable in both the organoid and control (tail) sample. We excluded positions at which indels were called, as these positions likely represent false-positive base substitution calls. Furthermore, we only included positions with a ‘PASS’ flag by GATK VariantFiltration, a GATK phred-scaled quality score ≥ 100, a sample-level genotype quality of 99 in the organoid culture and ≥ 10 in the control (tail) sample, and a coverage of ≥ 20X in the organoid and the tail sample. We subsequently excluded variants with any evidence in another organoid sample or control (tail) sample of the same mouse to remove germline variants. To exclude potentially missed germline events, we also removed positions that have any evidence in the organoid and/or control samples of the other mice. Finally, we excluded positions with a variant allele frequency (VAF) < 0.3 in the organoid sample to exclude mutations that were induced after the clonal step.

For the human samples, we only considered base substitutions on the autosomal genome that were callable in the control (blood) sample, clonal organoid and subclonal organoid culture. We considered mutations with a ‘PASS’ flag by GATK VariantFiltration and a GATK phred-scaled quality score ≥ 100. To remove germline variants, all variants with evidence in the control (blood) sample were excluded for both the clonal and subclonal organoid cultures. To exclude potentially missed germline events, we removed positions that are in the Single Nucleotide Polymorphism Database v137.b3730, or in a blacklist with positions that are recurrent in unmatched individuals (Supplemental Data S4). Subsequently, for both the clonal and subclonal cultures, all variants with a VAF < 0.3 were excluded. Finally, the resulting somatic base substitution catalogs of the clonal and subclonal cultures were compared and all events unique to the subclonal organoid were considered to be accumulated after the *XPC* deletion, that is: between the two sequential clonal expansion steps.

**Callable genome**

The callable genome was determined for all sequenced samples using the GATK CallableLoci tool v3.4.46 [(Van der Auwera et al. 2013)](https://paperpile.com/c/FB4uHU/L8vuq) with default settings and additional optional parameters ‘minBaseQuality 10’, ‘minMappingQuality 10’, ‘maxFractionOfReadsWithLowMAPQ 20’, and ‘minDepth 20’. ‘CALLABLE’ regions were extracted from every output file. Subsequently, genomic regions that were callable (1) in the mouse organoid clone and the control (tail) sample, and (2) in the human organoid clone, subclone, and control (blood) were intersected to define a genomic region that is surveyed in all samples that were compared.

**Validation of base substitutions in *Ercc1*-/Δ and WT mouse organoid cultures**

To independently validate all base substitution positions, new sequencing libraries were generated from DNA samples of all 11 mouse organoid cultures and of the tail of WT1 (DNA samples were isolated in ‘WGS and read alignment’) using the Twist Human Core Exome v1.3 Complete Kit. The libraries were pooled and size-selected twice using 0.55X and 0.8X AMPure XP beads. For all base substitutions, an enrichment probe of 120 bp was designed for both the reference and variant allele with a minimum number of repeats and with the base substitution position at least 10 bp from the end. The probes were produced by Twist Bioscience. Subsequently, the pooled libraries were enriched with the enrichment probes in two enrichment reactions using the Twist Human Core Exome v1.3 Complete Kit and sequenced 2 x 150 bp paired-end with the Illumina NextSeq 500 at the Utrecht Sequencing Facility. Base substitutions were called as described in ‘Base substitution and indel calling’. Variants were considered true if they were called with a filter ‘PASS’ in 1 out of 12 samples. The remaining 220 variants were checked manually in IGV and considered true if they were found in 1 out of 12 samples at an allele frequency of > 10%. In total, 4,130/4,238 variants (97.5%) were confirmed using this approach (Supplemental file S2).

**Calculation of mutation rates**

To calculate the mutation rates per genome per week, we quantified the number of somatic base substitutions, double nucleotide mutations, indels, and SVs for each mouse ASC. Moreover, we quantified the number of base substitutions, double base substitutions and Signature 8 mutations for the human ASCs. All event counts were extrapolated to the entire autosomal genome using the callable genome length (see” Callable genome”) for both mouse and human ASCs to correct for differences in the surveyed genome. Subsequently, the mutation rates were calculated by dividing the extrapolated number of mutations by the number of weeks in which the mutations were accumulated (WT and *Ercc1*-/Δ mouse organoids: 16 weeks (15 weeks during life and 1 week *in vitro*); *XPC*WT human organoids: 20.6 weeks; *XPC*KO human organoid 10.3 weeks). To determine the proportion of additionally accumulated mutations in the *XPC*KO culture that can be attributed to Signature 8 in human ASCs, we first calculated the increase in base substitutions and the increase in Signature 8 mutations of *XPC*KO compared to *XPC*WT1, *XPC*WT2, and *XPC*WT3 separately. We then divided the increase in Signature 8 mutations by the total increase in base substitutions.

**Western blot**

Protein samples from mouse organoid cultures were collected in Laemmli buffer and measured using the Qubittm 3.0 Fluorometer (Thermo Fisher Scientific) with the Qubittm Protein Assay Kit (Thermo Fisher Scientific, Q33211). Protein samples from human organoid cultures were collected in Laemmli buffer and measured using a Lowry protein assay. 30µg of protein per sample was run on a 10% SDS page gel. Subsequently, the proteins were transferred to a nitrocellulose membrane. After transfer, the membrane was blocked for 1 hour using 5% ELK (Campina) at room temperature and subsequently incubated overnight with the primary antibody (ERCC1: Abcam, ab129267; XPC: Cell Signaling Technology; #12701). Secondary antibody was incubated 1 hour at room temperature, and subsequently proteins were visualized using the Amersham ECL Western blotting analysis system (GE Healthcare, RPN2109) and the Amersham Imager 600 system (GE Healthcare).

**References**

Anders S, Huber W. 2010. Differential expression analysis for sequence count data. Genome Biology 11: R106. http://dx.doi.org/10.1186/gb-2010-11-10-r106.

[Blokzijl F, de Ligt J, Jager M, Sasselli V, Roerink S, Sasaki N, Huch M, Boymans S, Kuijk E, Prins P, et al. 2016. Tissue-specific mutation accumulation in human adult stem cells during life. *Nature* **538**: 260–264.](http://paperpile.com/b/FB4uHU/NA41P)

[Li H, Durbin R. 2009. Fast and accurate short read alignment with Burrows-Wheeler transform. *Bioinformatics* **25**: 1754–1760.](http://paperpile.com/b/FB4uHU/OjCk)

[Van der Auwera GA, Carneiro MO, Hartl C, Poplin R, Del Angel G, Levy-Moonshine A, Jordan T, Shakir K, Roazen D, Thibault J, et al. 2013. From FastQ data to high confidence variant calls: the Genome Analysis Toolkit best practices pipeline. *Curr Protoc Bioinformatics* **43**: 11.10.1–33.](http://paperpile.com/b/FB4uHU/L8vuq)

[Vermeij WP, Dollé MET, Reiling E, Jaarsma D, Payan-Gomez C, Bombardieri CR, Wu H, Roks AJM, Botter SM, van der Eerden BC, et al. 2016. Restricted diet delays accelerated ageing and genomic stress in DNA-repair-deficient mice. *Nature* **537**: 427–431.](http://paperpile.com/b/FB4uHU/U2Am)
